# Supplementary material for: Palm fruit colours are linked to the broad-scale distribution and diversification of primate colour vision systems
Source: Proc Biol Sci. 2020 Feb 26;287(1921):20192731. doi: 10.1098/rspb.2019.2731 (PMC7062032; doi:10.1098/rspb.2019.2731)
Supplement: Appendix S2 [file rspb20192731supp3.xlsx]

## Sheet: Read me
Palm fruit colours are linked to the broad-scale distribution and diversification of primate colour vision systems
Renske E. Onstein1,2, Daphne N. Vink2, Jorin Veen2, Christopher D. Barratt1,3, Suzette G.A. Flantua2,4, Serge A. Wich2,5, W. Daniel Kissling2
1 German Centre for Integrative Biodiversity Research (iDiv) Halle-Jena-Leipzig, Deutscher Platz 5e, 04103 Leipzig, Germany.
2 University of Amsterdam, Institute for Biodiversity and Ecosystem Dynamics (IBED), P.O. Box 94240, Amsterdam, The Netherlands.
3 Max Planck Institute for Evolutionary Anthropology, Department of Primatology, Deutscher Platz 6, 04103 Leipzig, Germany.
4 University of Bergen, Department of Biological Sciences, PO Box 7803, 5020, Bergen, Norway.
5 Liverpool John Moores University, School of Natural Sciences and Psychology. Byrom street, L33AF, Liverpool, UK.
*Corresponding author: onsteinre@gmail.com
Proceedings of the Royal Society:B, doi:10.1098/rspb.2019.2731
Metadata
Sheet
Palm data	Palm fruit colour data
Fig data	Fig fruit colour data
Comments	General comments
General criteria	Criteria used to classify colours to non-conspicuous/conspicuous states
Classificaton	Additional criteria used to classify colours to non-conspicuous/conspicuous states
References	References used to classify palm and fig species to non-conspicuous/conspicuous

## Sheet: Palm data
PalmsSpecies	accGenus	accSpecies	PalmTribe	PalmSubfamily	Non-conspicuous	Conspicuous	Classified colour(s)
Acanthophoenix crinita	Acanthophoenix	crinita	Areceae	Arecoideae	1	0	black
Acanthophoenix rousselii	Acanthophoenix	rousselii	Areceae	Arecoideae	1	0	black
Acanthophoenix rubra	Acanthophoenix	rubra	Areceae	Arecoideae	1	0	black
Acoelorrhaphe wrightii	Acoelorrhaphe	wrightii	Trachycarpeae	Coryphoideae	1	0	brown, black
Acrocomia aculeata	Acrocomia	aculeata	Cocoseae	Arecoideae	1	0	green
Acrocomia crispa	Acrocomia	crispa	Cocoseae	Arecoideae	0	1	yellow, orange
Acrocomia hassleri	Acrocomia	hassleri	Cocoseae	Arecoideae	1	0	brown
Acrocomia intumescens	Acrocomia	intumescens	Cocoseae	Arecoideae	0	1	yellow
Acrocomia media	Acrocomia	media	Cocoseae	Arecoideae	0	1	yellow
Acrocomia totai	Acrocomia	totai	Cocoseae	Arecoideae	0	1	yellow, orange
Actinokentia divaricata	Actinokentia	divaricata	Areceae	Arecoideae	0	1	red, purple
Actinorhytis calapparia	Actinorhytis	calapparia	Areceae	Arecoideae	0	1	red
Adonidia maturbongsii	Adonidia	maturbongsii	Areceae	Arecoideae	0	1	orange, red
Adonidia merrillii	Adonidia	merrillii	Areceae	Arecoideae	0	1	red
Aiphanes acanthophylla	Aiphanes	acanthophylla	Cocoseae	Arecoideae	0	1	red
Aiphanes acaulis	Aiphanes	acaulis	Cocoseae	Arecoideae	0	1	purple, red
Aiphanes bicornis	Aiphanes	bicornis	Cocoseae	Arecoideae	0	1	red, orange
Aiphanes chiribogensis	Aiphanes	chiribogensis	Cocoseae	Arecoideae	0	1	red
Aiphanes deltoidea	Aiphanes	deltoidea	Cocoseae	Arecoideae	0	1	yellow
Aiphanes duquei	Aiphanes	duquei	Cocoseae	Arecoideae	0	1	red
Aiphanes eggersii	Aiphanes	eggersii	Cocoseae	Arecoideae	0	1	red
Aiphanes erinacea	Aiphanes	erinacea	Cocoseae	Arecoideae	0	1	red, brown, black
Aiphanes gelatinosa	Aiphanes	gelatinosa	Cocoseae	Arecoideae	1	0	brown, black
Aiphanes grandis	Aiphanes	grandis	Cocoseae	Arecoideae	1	0	green
Aiphanes hirsuta	Aiphanes	hirsuta	Cocoseae	Arecoideae	0	1	red, purple, white
Aiphanes horrida	Aiphanes	horrida	Cocoseae	Arecoideae	0	1	red
Aiphanes lindeniana	Aiphanes	lindeniana	Cocoseae	Arecoideae	0	1	red, orange
Aiphanes macroloba	Aiphanes	macroloba	Cocoseae	Arecoideae	0	1	red, orange
Aiphanes minima	Aiphanes	minima	Cocoseae	Arecoideae	0	1	red
Aiphanes multiplex	Aiphanes	multiplex	Cocoseae	Arecoideae	0	1	red
Aiphanes parvifolia	Aiphanes	parvifolia	Cocoseae	Arecoideae	0	1	orange, red
Aiphanes pilaris	Aiphanes	pilaris	Cocoseae	Arecoideae	1	0	brown
Aiphanes simplex	Aiphanes	simplex	Cocoseae	Arecoideae	0	1	red
Aiphanes stergiosii	Aiphanes	stergiosii	Cocoseae	Arecoideae	0	1	red, orange
Aiphanes tricuspidata	Aiphanes	tricuspidata	Cocoseae	Arecoideae	1	0	brown
Aiphanes ulei	Aiphanes	ulei	Cocoseae	Arecoideae	0	1	red
Aiphanes verrucosa	Aiphanes	verrucosa	Cocoseae	Arecoideae	1	0	white
Aiphanes weberbaueri	Aiphanes	weberbaueri	Cocoseae	Arecoideae	0	1	red, purple
Allagoptera arenaria	Allagoptera	arenaria	Cocoseae	Arecoideae	1	0	green
Allagoptera brevicalyx	Allagoptera	brevicalyx	Cocoseae	Arecoideae	1	0	green
Allagoptera campestris	Allagoptera	campestris	Cocoseae	Arecoideae	1	0	green
Allagoptera caudescens	Allagoptera	caudescens	Cocoseae	Arecoideae	1	0	brown
Allagoptera leucocalyx	Allagoptera	leucocalyx	Cocoseae	Arecoideae	1	0	green
Ammandra decasperma	Ammandra	decasperma	Phytelepheae	Ceroxyloideae	1	0	brown
Aphandra natalia	Aphandra	natalia	Phytelepheae	Ceroxyloideae	1	0	brown
Archontophoenix alexandrae	Archontophoenix	alexandrae	Areceae	Arecoideae	0	1	red
Archontophoenix cunninghamiana	Archontophoenix	cunninghamiana	Areceae	Arecoideae	0	1	red
Archontophoenix maxima	Archontophoenix	maxima	Areceae	Arecoideae	0	1	red
Archontophoenix myolensis	Archontophoenix	myolensis	Areceae	Arecoideae	0	1	red
Archontophoenix purpurea	Archontophoenix	purpurea	Areceae	Arecoideae	0	1	red
Archontophoenix tuckeri	Archontophoenix	tuckeri	Areceae	Arecoideae	0	1	red
Areca ahmadii	Areca	ahmadii	Areceae	Arecoideae	1	0	black
Areca andersonii	Areca	andersonii	Areceae	Arecoideae	1	0	green
Areca arundinacea	Areca	arundinacea	Areceae	Arecoideae	0	1	red
Areca caliso	Areca	caliso	Areceae	Arecoideae	0	1	orange
Areca camarinensis	Areca	camarinensis	Areceae	Arecoideae	0	1	green, orange, red
Areca catechu	Areca	catechu	Areceae	Arecoideae	0	1	yellow, orange, red
Areca chaiana	Areca	chaiana	Areceae	Arecoideae	0	1	red, black
Areca churchii	Areca	churchii	Areceae	Arecoideae	1	0	green
Areca concinna	Areca	concinna	Areceae	Arecoideae	0	1	red, green, orange, red
Areca furcata	Areca	furcata	Areceae	Arecoideae	0	1	yellow, red
Areca hutchinsoniana	Areca	hutchinsoniana	Areceae	Arecoideae	0	1	white, yellow, red
Areca insignis	Areca	insignis	Areceae	Arecoideae	0	1	red
Areca ipot	Areca	ipot	Areceae	Arecoideae	0	1	red
Areca kinabaluensis	Areca	kinabaluensis	Areceae	Arecoideae	1	0	green
Areca klingkangensis	Areca	klingkangensis	Areceae	Arecoideae	0	1	yellow
Areca laosensis	Areca	laosensis	Areceae	Arecoideae	0	1	orange
Areca macrocalyx	Areca	macrocalyx	Areceae	Arecoideae	0	1	yellow, orange
Areca minuta	Areca	minuta	Areceae	Arecoideae	0	1	orange, red
Areca montana	Areca	montana	Areceae	Arecoideae	0	1	red
Areca novohibernica	Areca	novohibernica	Areceae	Arecoideae	0	1	green, red
Areca oxycarpa	Areca	oxycarpa	Areceae	Arecoideae	0	1	yellow
Areca parens	Areca	parens	Areceae	Arecoideae	0	1	white, green, orange
Areca rheophytica	Areca	rheophytica	Areceae	Arecoideae	0	1	pink, red
Areca ridleyana	Areca	ridleyana	Areceae	Arecoideae	0	1	red
Areca riparia	Areca	riparia	Areceae	Arecoideae	0	1	red
Areca subacaulis	Areca	subacaulis	Areceae	Arecoideae	1	0	purple
Areca triandra	Areca	triandra	Areceae	Arecoideae	0	1	red, orange
Areca tunku	Areca	tunku	Areceae	Arecoideae	1	0	purple, brown
Areca vestiaria	Areca	vestiaria	Areceae	Arecoideae	0	1	orange, red
Areca vidaliana	Areca	vidaliana	Areceae	Arecoideae	0	1	red
Areca whitfordii	Areca	whitfordii	Areceae	Arecoideae	1	0	brown
Arenga australasica	Arenga	australasica	Caryoteae	Coryphoideae	0	1	red
Arenga brevipes	Arenga	brevipes	Caryoteae	Coryphoideae	1	0	green, black
Arenga caudata	Arenga	caudata	Caryoteae	Coryphoideae	0	1	red, orange
Arenga distincta	Arenga	distincta	Caryoteae	Coryphoideae	1	0	green, brown
Arenga engleri	Arenga	engleri	Caryoteae	Coryphoideae	0	1	orange
Arenga hastata	Arenga	hastata	Caryoteae	Coryphoideae	1	0	purple, brown
Arenga hookeriana	Arenga	hookeriana	Caryoteae	Coryphoideae	0	1	orange, red
Arenga listeri	Arenga	listeri	Caryoteae	Coryphoideae	0	1	white, pink, red
Arenga longicarpa	Arenga	longicarpa	Caryoteae	Coryphoideae	1	0	purple
Arenga micrantha	Arenga	micrantha	Caryoteae	Coryphoideae	0	1	yellow, red
Arenga microcarpa	Arenga	microcarpa	Caryoteae	Coryphoideae	0	1	white, red
Arenga obtusifolia	Arenga	obtusifolia	Caryoteae	Coryphoideae	1	0	green
Arenga pinnata	Arenga	pinnata	Caryoteae	Coryphoideae	0	1	green, yellow, orange
Arenga porphyrocarpa	Arenga	porphyrocarpa	Caryoteae	Coryphoideae	0	1	purple, orange
Arenga retroflorescens	Arenga	retroflorescens	Caryoteae	Coryphoideae	0	1	red, brown
Arenga ryukyuensis	Arenga	ryukyuensis	Caryoteae	Coryphoideae	0	1	orange
Arenga tremula	Arenga	tremula	Caryoteae	Coryphoideae	0	1	red
Arenga undulatifolia	Arenga	undulatifolia	Caryoteae	Coryphoideae	1	0	green
Arenga westerhoutii	Arenga	westerhoutii	Caryoteae	Coryphoideae	1	0	black
Arenga wightii	Arenga	wightii	Caryoteae	Coryphoideae	1	0	black
Asterogyne guianensis	Asterogyne	guianensis	Geonomateae	Arecoideae	0	1	red
Asterogyne martiana	Asterogyne	martiana	Geonomateae	Arecoideae	1	0	black
Asterogyne spicata	Asterogyne	spicata	Geonomateae	Arecoideae	0	1	red
Astrocaryum acaule	Astrocaryum	acaule	Cocoseae	Arecoideae	0	1	yellow
Astrocaryum aculeatissimum	Astrocaryum	aculeatissimum	Cocoseae	Arecoideae	1	0	brown
Astrocaryum aculeatum	Astrocaryum	aculeatum	Cocoseae	Arecoideae	0	1	orange
Astrocaryum alatum	Astrocaryum	alatum	Cocoseae	Arecoideae	1	0	green
Astrocaryum campestre	Astrocaryum	campestre	Cocoseae	Arecoideae	1	0	green
Astrocaryum chambira	Astrocaryum	chambira	Cocoseae	Arecoideae	0	1	yellow, orange
Astrocaryum confertum	Astrocaryum	confertum	Cocoseae	Arecoideae	1	0	brown
Astrocaryum faranae	Astrocaryum	faranae	Cocoseae	Arecoideae	0	1	orange
Astrocaryum farinosum	Astrocaryum	farinosum	Cocoseae	Arecoideae	1	0	brown
Astrocaryum giganteum	Astrocaryum	giganteum	Cocoseae	Arecoideae	0	1	yellow, brown
Astrocaryum gratum	Astrocaryum	gratum	Cocoseae	Arecoideae	0	1	orange, yellow
Astrocaryum huaimi	Astrocaryum	huaimi	Cocoseae	Arecoideae	0	1	orange
Astrocaryum huicungo	Astrocaryum	huicungo	Cocoseae	Arecoideae	0	1	yellow, orange
Astrocaryum jauari	Astrocaryum	jauari	Cocoseae	Arecoideae	0	1	yellow, orange
Astrocaryum javarense	Astrocaryum	javarense	Cocoseae	Arecoideae	1	0	brown
Astrocaryum murumuru	Astrocaryum	murumuru	Cocoseae	Arecoideae	0	1	yellow, brown
Astrocaryum paramaca	Astrocaryum	paramaca	Cocoseae	Arecoideae	1	0	brown
Astrocaryum rodriguesii	Astrocaryum	rodriguesii	Cocoseae	Arecoideae	0	1	orange
Astrocaryum sciophilum	Astrocaryum	sciophilum	Cocoseae	Arecoideae	1	0	brown
Astrocaryum sociale	Astrocaryum	sociale	Cocoseae	Arecoideae	0	1	orange
Astrocaryum standleyanum	Astrocaryum	standleyanum	Cocoseae	Arecoideae	0	1	orange
Astrocaryum tucuma	Astrocaryum	tucuma	Cocoseae	Arecoideae	0	1	orange
Astrocaryum ulei	Astrocaryum	ulei	Cocoseae	Arecoideae	1	0	brown
Astrocaryum vulgare	Astrocaryum	vulgare	Cocoseae	Arecoideae	0	1	yellow, orange
Attalea allenii	Attalea	allenii	Cocoseae	Arecoideae	1	0	brown
Attalea amygdalina	Attalea	amygdalina	Cocoseae	Arecoideae	1	0	brown
Attalea apoda	Attalea	apoda	Cocoseae	Arecoideae	1	0	brown
Attalea attaleoides	Attalea	attaleoides	Cocoseae	Arecoideae	1	0	brown
Attalea barreirensis	Attalea	barreirensis	Cocoseae	Arecoideae	0	1	yellow, orange, red
Attalea blepharopus	Attalea	blepharopus	Cocoseae	Arecoideae	1	0	brown
Attalea brasiliensis	Attalea	brasiliensis	Cocoseae	Arecoideae	1	0	brown
Attalea burretiana	Attalea	burretiana	Cocoseae	Arecoideae	1	0	brown
Attalea butyracea	Attalea	butyracea	Cocoseae	Arecoideae	0	1	orange, yellow, brown
Attalea cohune	Attalea	cohune	Cocoseae	Arecoideae	1	0	brown
Attalea colenda	Attalea	colenda	Cocoseae	Arecoideae	1	0	brown
Attalea compta	Attalea	compta	Cocoseae	Arecoideae	1	0	brown
Attalea crassispatha	Attalea	crassispatha	Cocoseae	Arecoideae	0	1	red
Attalea cuatrecasana	Attalea	cuatrecasana	Cocoseae	Arecoideae	1	0	brown
Attalea dahlgreniana	Attalea	dahlgreniana	Cocoseae	Arecoideae	1	0	brown
Attalea dubia	Attalea	dubia	Cocoseae	Arecoideae	1	0	brown
Attalea eichleri	Attalea	eichleri	Cocoseae	Arecoideae	1	0	brown
Attalea exigua	Attalea	exigua	Cocoseae	Arecoideae	0	1	orange, purple
Attalea funifera	Attalea	funifera	Cocoseae	Arecoideae	1	0	brown
Attalea geraensis	Attalea	geraensis	Cocoseae	Arecoideae	1	0	brown
Attalea humilis	Attalea	humilis	Cocoseae	Arecoideae	1	0	brown
Attalea insignis	Attalea	insignis	Cocoseae	Arecoideae	0	1	orange
Attalea luetzelburgii	Attalea	luetzelburgii	Cocoseae	Arecoideae	1	0	brown
Attalea magdalenica	Attalea	magdalenica	Cocoseae	Arecoideae	0	1	yellow
Attalea maripa	Attalea	maripa	Cocoseae	Arecoideae	0	1	orange
Attalea microcarpa	Attalea	microcarpa	Cocoseae	Arecoideae	0	1	yellow
Attalea minarum	Attalea	minarum	Cocoseae	Arecoideae	1	0	brown
Attalea moorei	Attalea	moorei	Cocoseae	Arecoideae	1	0	brown
Attalea nucifera	Attalea	nucifera	Cocoseae	Arecoideae	1	0	brown
Attalea oleifera	Attalea	oleifera	Cocoseae	Arecoideae	1	0	brown
Attalea peruviana	Attalea	peruviana	Cocoseae	Arecoideae	0	1	orange
Attalea phalerata	Attalea	phalerata	Cocoseae	Arecoideae	1	0	green, brown
Attalea pindobassu	Attalea	pindobassu	Cocoseae	Arecoideae	0	1	orange
Attalea plowmanii	Attalea	plowmanii	Cocoseae	Arecoideae	1	0	brown
Attalea princeps	Attalea	princeps	Cocoseae	Arecoideae	1	0	green
Attalea racemosa	Attalea	racemosa	Cocoseae	Arecoideae	1	0	brown
Attalea rostrata	Attalea	rostrata	Cocoseae	Arecoideae	1	0	brown
Attalea seabrensis	Attalea	seabrensis	Cocoseae	Arecoideae	1	0	brown
Attalea speciosa	Attalea	speciosa	Cocoseae	Arecoideae	1	0	brown
Attalea spectabilis	Attalea	spectabilis	Cocoseae	Arecoideae	1	0	brown
Attalea tessmannii	Attalea	tessmannii	Cocoseae	Arecoideae	1	0	brown
Bactris acanthocarpa	Bactris	acanthocarpa	Cocoseae	Arecoideae	0	1	orange, red
Bactris acanthocarpoides	Bactris	acanthocarpoides	Cocoseae	Arecoideae	0	1	orange, red
Bactris ana-juliae	Bactris	ana-juliae	Cocoseae	Arecoideae	0	1	orange, red
Bactris aubletiana	Bactris	aubletiana	Cocoseae	Arecoideae	0	1	orange
Bactris bahiensis	Bactris	bahiensis	Cocoseae	Arecoideae	1	0	green
Bactris balanophora	Bactris	balanophora	Cocoseae	Arecoideae	0	1	orange
Bactris barronis	Bactris	barronis	Cocoseae	Arecoideae	0	1	orange, red
Bactris bidentula	Bactris	bidentula	Cocoseae	Arecoideae	1	0	purple, black
Bactris bifida	Bactris	bifida	Cocoseae	Arecoideae	1	0	purple, black
Bactris brongniartii	Bactris	brongniartii	Cocoseae	Arecoideae	1	0	purple, black
Bactris campestris	Bactris	campestris	Cocoseae	Arecoideae	0	1	red, orange
Bactris caryotifolia	Bactris	caryotifolia	Cocoseae	Arecoideae	1	0	purple, black
Bactris caudata	Bactris	caudata	Cocoseae	Arecoideae	0	1	orange, red
Bactris charnleyae	Bactris	charnleyae	Cocoseae	Arecoideae	0	1	orange, yellow
Bactris chaveziae	Bactris	chaveziae	Cocoseae	Arecoideae	1	0	purple, black
Bactris coloniata	Bactris	coloniata	Cocoseae	Arecoideae	0	1	brown, red
Bactris coloradonis	Bactris	coloradonis	Cocoseae	Arecoideae	0	1	orange, red
Bactris concinna	Bactris	concinna	Cocoseae	Arecoideae	1	0	purple, black
Bactris constanciae	Bactris	constanciae	Cocoseae	Arecoideae	0	1	red, purple
Bactris corossilla	Bactris	corossilla	Cocoseae	Arecoideae	0	1	yellow, purple, black
Bactris cubensis	Bactris	cubensis	Cocoseae	Arecoideae	0	1	red
Bactris cuspidata	Bactris	cuspidata	Cocoseae	Arecoideae	0	1	red
Bactris dianeura	Bactris	dianeura	Cocoseae	Arecoideae	0	1	orange
Bactris elegans	Bactris	elegans	Cocoseae	Arecoideae	1	0	purple, black
Bactris faucium	Bactris	faucium	Cocoseae	Arecoideae	1	0	purple, black
Bactris ferruginea	Bactris	ferruginea	Cocoseae	Arecoideae	1	0	purple, black
Bactris fissifrons	Bactris	fissifrons	Cocoseae	Arecoideae	0	1	yellow
Bactris gasipaes	Bactris	gasipaes	Cocoseae	Arecoideae	0	1	yellow, orange, red
Bactris gastoniana	Bactris	gastoniana	Cocoseae	Arecoideae	1	0	purple, black
Bactris glandulosa	Bactris	glandulosa	Cocoseae	Arecoideae	0	1	red
Bactris glassmanii	Bactris	glassmanii	Cocoseae	Arecoideae	0	1	yellow
Bactris glaucescens	Bactris	glaucescens	Cocoseae	Arecoideae	1	0	purple, black
Bactris gracilior	Bactris	gracilior	Cocoseae	Arecoideae	0	1	orange
Bactris grayumii	Bactris	grayumii	Cocoseae	Arecoideae	0	1	orange
Bactris guineensis	Bactris	guineensis	Cocoseae	Arecoideae	1	0	purple, black
Bactris halmoorei	Bactris	halmoorei	Cocoseae	Arecoideae	0	1	orange, red
Bactris hatschbachii	Bactris	hatschbachii	Cocoseae	Arecoideae	1	0	purple, black
Bactris herrerana	Bactris	herrerana	Cocoseae	Arecoideae	0	1	red
Bactris hirta	Bactris	hirta	Cocoseae	Arecoideae	0	1	orange, red, black
Bactris horridispatha	Bactris	horridispatha	Cocoseae	Arecoideae	1	0	purple, black
Bactris jamaicana	Bactris	jamaicana	Cocoseae	Arecoideae	0	1	orange, red
Bactris killipii	Bactris	killipii	Cocoseae	Arecoideae	0	1	orange, red
Bactris kunorum	Bactris	kunorum	Cocoseae	Arecoideae	0	1	orange, red
Bactris longiseta	Bactris	longiseta	Cocoseae	Arecoideae	1	0	purple, brown
Bactris macroacantha	Bactris	macroacantha	Cocoseae	Arecoideae	1	0	purple, black
Bactris major	Bactris	major	Cocoseae	Arecoideae	1	0	purple, black
Bactris maraja	Bactris	maraja	Cocoseae	Arecoideae	1	0	purple, black
Bactris martiana	Bactris	martiana	Cocoseae	Arecoideae	1	0	purple, black
Bactris mexicana	Bactris	mexicana	Cocoseae	Arecoideae	0	1	orange
Bactris militaris	Bactris	militaris	Cocoseae	Arecoideae	0	1	red
Bactris nancibaensis	Bactris	nancibaensis	Cocoseae	Arecoideae	1	0	black, purple
Bactris obovata	Bactris	obovata	Cocoseae	Arecoideae	0	1	red
Bactris oligocarpa	Bactris	oligocarpa	Cocoseae	Arecoideae	1	0	purple, black
Bactris oligoclada	Bactris	oligoclada	Cocoseae	Arecoideae	0	1	orange, red
Bactris panamensis	Bactris	panamensis	Cocoseae	Arecoideae	0	1	orange
Bactris pickelii	Bactris	pickelii	Cocoseae	Arecoideae	1	0	purple
Bactris pilosa	Bactris	pilosa	Cocoseae	Arecoideae	1	0	purple, black
Bactris pliniana	Bactris	pliniana	Cocoseae	Arecoideae	0	1	orange
Bactris plumeriana	Bactris	plumeriana	Cocoseae	Arecoideae	0	1	orange, red
Bactris ptariana	Bactris	ptariana	Cocoseae	Arecoideae	0	1	orange, red
Bactris rhaphidacantha	Bactris	rhaphidacantha	Cocoseae	Arecoideae	0	1	orange, red
Bactris riparia	Bactris	riparia	Cocoseae	Arecoideae	0	1	orange, red, green
Bactris rostrata	Bactris	rostrata	Cocoseae	Arecoideae	1	0	brown
Bactris schultesii	Bactris	schultesii	Cocoseae	Arecoideae	0	1	red, orange
Bactris setiflora	Bactris	setiflora	Cocoseae	Arecoideae	1	0	purple, black
Bactris setosa	Bactris	setosa	Cocoseae	Arecoideae	1	0	purple, black
Bactris setulosa	Bactris	setulosa	Cocoseae	Arecoideae	0	1	orange, red
Bactris simplicifrons	Bactris	simplicifrons	Cocoseae	Arecoideae	0	1	red, orange, yellow
Bactris soeiroana	Bactris	soeiroana	Cocoseae	Arecoideae	0	1	yellow
Bactris sphaerocarpa	Bactris	sphaerocarpa	Cocoseae	Arecoideae	1	0	purple, black
Bactris syagroides	Bactris	syagroides	Cocoseae	Arecoideae	0	1	orange, yellow
Bactris tefensis	Bactris	tefensis	Cocoseae	Arecoideae	0	1	orange, red
Bactris timbuiensis	Bactris	timbuiensis	Cocoseae	Arecoideae	0	1	orange, red
Bactris tomentosa	Bactris	tomentosa	Cocoseae	Arecoideae	1	0	purple, black
Bactris vulgaris	Bactris	vulgaris	Cocoseae	Arecoideae	1	0	purple
Balaka diffusa	Balaka	diffusa	Areceae	Arecoideae	0	1	orange, red
Balaka longirostris	Balaka	longirostris	Areceae	Arecoideae	0	1	red
Balaka macrocarpa	Balaka	macrocarpa	Areceae	Arecoideae	0	1	orange, red
Balaka microcarpa	Balaka	microcarpa	Areceae	Arecoideae	0	1	red
Balaka samoensis	Balaka	samoensis	Areceae	Arecoideae	0	1	orange, red
Balaka seemannii	Balaka	seemannii	Areceae	Arecoideae	0	1	red
Balaka streptostachys	Balaka	streptostachys	Areceae	Arecoideae	0	1	orange, red
Balaka tahitensis	Balaka	tahitensis	Areceae	Arecoideae	0	1	orange, red
Barcella odora	Barcella	odora	Cocoseae	Arecoideae	0	1	orange
Basselinia deplanchei	Basselinia	deplanchei	Areceae	Arecoideae	0	1	yellow, black
Basselinia eriostachys	Basselinia	eriostachys	Areceae	Arecoideae	0	1	yellow, red
Basselinia favieri	Basselinia	favieri	Areceae	Arecoideae	1	0	brown, black
Basselinia glabrata	Basselinia	glabrata	Areceae	Arecoideae	1	0	green, black
Basselinia gracilis	Basselinia	gracilis	Areceae	Arecoideae	1	0	black
Basselinia humboldtiana	Basselinia	humboldtiana	Areceae	Arecoideae	1	0	brown
Basselinia iterata	Basselinia	iterata	Areceae	Arecoideae	1	0	black
Basselinia moorei	Basselinia	moorei	Areceae	Arecoideae	0	1	red
Basselinia pancheri	Basselinia	pancheri	Areceae	Arecoideae	1	0	black
Basselinia porphyrea	Basselinia	porphyrea	Areceae	Arecoideae	1	0	brown, black
Basselinia sordida	Basselinia	sordida	Areceae	Arecoideae	1	0	green
Basselinia tomentosa	Basselinia	tomentosa	Areceae	Arecoideae	1	0	black
Basselinia velutina	Basselinia	velutina	Areceae	Arecoideae	1	0	black
Basselinia vestita	Basselinia	vestita	Areceae	Arecoideae	1	0	black
Beccariophoenix alfredii	Beccariophoenix	alfredii	Cocoseae	Arecoideae	1	0	purple, black
Beccariophoenix madagascariensis	Beccariophoenix	madagascariensis	Cocoseae	Arecoideae	1	0	purple, brown
Bentinckia condapanna	Bentinckia	condapanna	Areceae	Arecoideae	1	0	brown
Bentinckia nicobarica	Bentinckia	nicobarica	Areceae	Arecoideae	0	1	red
Bismarckia nobilis	Bismarckia	nobilis	Borasseae	Coryphoideae	1	0	brown
Borassodendron borneense	Borassodendron	borneense	Borasseae	Coryphoideae	1	0	brown
Borassodendron machadonis	Borassodendron	machadonis	Borasseae	Coryphoideae	1	0	purple, black
Borassus aethiopum	Borassus	aethiopum	Borasseae	Coryphoideae	1	0	brown
Borassus akeassii	Borassus	akeassii	Borasseae	Coryphoideae	1	0	green
Borassus flabellifer	Borassus	flabellifer	Borasseae	Coryphoideae	1	0	purple, black, brown
Borassus heineanus	Borassus	heineanus	Borasseae	Coryphoideae	1	0	black
Borassus madagascariensis	Borassus	madagascariensis	Borasseae	Coryphoideae	1	0	brown, green
Brahea aculeata	Brahea	aculeata	Trachycarpeae	Coryphoideae	1	0	black
Brahea armata	Brahea	armata	Trachycarpeae	Coryphoideae	1	0	black, brown
Brahea brandegeei	Brahea	brandegeei	Trachycarpeae	Coryphoideae	1	0	brown
Brahea calcarea	Brahea	calcarea	Trachycarpeae	Coryphoideae	1	0	black
Brahea dulcis	Brahea	dulcis	Trachycarpeae	Coryphoideae	1	0	green
Brahea edulis	Brahea	edulis	Trachycarpeae	Coryphoideae	1	0	black
Brahea moorei	Brahea	moorei	Trachycarpeae	Coryphoideae	1	0	purple
Brahea pimo	Brahea	pimo	Trachycarpeae	Coryphoideae	0	1	yellow
Brahea salvadorensis	Brahea	salvadorensis	Trachycarpeae	Coryphoideae	1	0	brown
Brahea sarukhanii	Brahea	sarukhanii	Trachycarpeae	Coryphoideae	1	0	black
Brassiophoenix drymophloeoides	Brassiophoenix	drymophloeoides	Areceae	Arecoideae	0	1	red
Brassiophoenix schumannii	Brassiophoenix	schumannii	Areceae	Arecoideae	0	1	yellow, orange
Burretiokentia dumasii	Burretiokentia	dumasii	Areceae	Arecoideae	1	0	purple
Burretiokentia hapala	Burretiokentia	hapala	Areceae	Arecoideae	1	0	purple, blue
Burretiokentia koghiensis	Burretiokentia	koghiensis	Areceae	Arecoideae	1	0	purple
Burretiokentia vieillardii	Burretiokentia	vieillardii	Areceae	Arecoideae	1	0	purple
Butia archeri	Butia	archeri	Cocoseae	Arecoideae	1	0	brown, straw-coloured
Butia campicola	Butia	campicola	Cocoseae	Arecoideae	1	0	brown
Butia capitata	Butia	capitata	Cocoseae	Arecoideae	0	1	brown, yellow
Butia catarinensis	Butia	catarinensis	Cocoseae	Arecoideae	0	1	yellow
Butia eriospatha	Butia	eriospatha	Cocoseae	Arecoideae	0	1	yellow
Butia exospadix	Butia	exospadix	Cocoseae	Arecoideae	1	0	purple
Butia lallemantii	Butia	lallemantii	Cocoseae	Arecoideae	0	1	orange, yellow
Butia leptospatha	Butia	leptospatha	Cocoseae	Arecoideae	1	0	purple, green
Butia marmorii	Butia	marmorii	Cocoseae	Arecoideae	1	0	purple
Butia microspadix	Butia	microspadix	Cocoseae	Arecoideae	0	1	yellow
Butia odorata	Butia	odorata	Cocoseae	Arecoideae	0	1	orange
Butia paraguayensis	Butia	paraguayensis	Cocoseae	Arecoideae	0	1	yellow
Butia purpurascens	Butia	purpurascens	Cocoseae	Arecoideae	1	0	purple
Butia quaraimana	Butia	quaraimana	Cocoseae	Arecoideae	0	1	orange, red
Butia yatay	Butia	yatay	Cocoseae	Arecoideae	0	1	yellow
Butyagrus nabonnandii	Butyagrus	nabonnandii	Cocoseae	Arecoideae	0	1	orange
Calamus acanthochlamys	Calamus	acanthochlamys	Calameae	Calamoideae	0	1	orange
Calamus acanthophyllus	Calamus	acanthophyllus	Calameae	Calamoideae	1	0	white
Calamus acanthospathus	Calamus	acanthospathus	Calameae	Calamoideae	1	0	brown
Calamus acuminatus	Calamus	acuminatus	Calameae	Calamoideae	1	0	straw-coloured, brown
Calamus albidus	Calamus	albidus	Calameae	Calamoideae	1	0	brown
Calamus amplijugus	Calamus	amplijugus	Calameae	Calamoideae	1	0	ivory
Calamus andamanicus	Calamus	andamanicus	Calameae	Calamoideae	1	0	brown
Calamus arborescens	Calamus	arborescens	Calameae	Calamoideae	1	0	brown
Calamus aruensis	Calamus	aruensis	Calameae	Calamoideae	1	0	cream, white
Calamus ashtonii	Calamus	ashtonii	Calameae	Calamoideae	1	0	brown
Calamus australis	Calamus	australis	Calameae	Calamoideae	1	0	cream, brown
Calamus austroguangxiensis	Calamus	austroguangxiensis	Calameae	Calamoideae	1	0	brown
Calamus axillaris	Calamus	axillaris	Calameae	Calamoideae	0	1	yellow
Calamus bacularis	Calamus	bacularis	Calameae	Calamoideae	0	1	red
Calamus balingensis	Calamus	balingensis	Calameae	Calamoideae	1	0	green
Calamus batanensis	Calamus	batanensis	Calameae	Calamoideae	1	0	purple
Calamus beccarii	Calamus	beccarii	Calameae	Calamoideae	1	0	brown
Calamus bicolor	Calamus	bicolor	Calameae	Calamoideae	0	1	pink
Calamus bimaniferus	Calamus	bimaniferus	Calameae	Calamoideae	1	0	brown
Calamus blumei	Calamus	blumei	Calameae	Calamoideae	1	0	green
Calamus bousigonii	Calamus	bousigonii	Calameae	Calamoideae	0	1	yellow
Calamus burkillianus	Calamus	burkillianus	Calameae	Calamoideae	1	0	white
Calamus caesius	Calamus	caesius	Calameae	Calamoideae	1	0	white
Calamus calospathus	Calamus	calospathus	Calameae	Calamoideae	1	0	green
Calamus caryotoides	Calamus	caryotoides	Calameae	Calamoideae	1	0	cream, brown
Calamus castaneus	Calamus	castaneus	Calameae	Calamoideae	1	0	brown
Calamus ceratophorus	Calamus	ceratophorus	Calameae	Calamoideae	0	1	yellow
Calamus ciliaris	Calamus	ciliaris	Calameae	Calamoideae	1	0	green
Calamus compsostachys	Calamus	compsostachys	Calameae	Calamoideae	0	1	yellow
Calamus comptus	Calamus	comptus	Calameae	Calamoideae	1	0	ivory, white
Calamus concinnus	Calamus	concinnus	Calameae	Calamoideae	0	1	yellow
Calamus conirostris	Calamus	conirostris	Calameae	Calamoideae	1	0	black
Calamus convallium	Calamus	convallium	Calameae	Calamoideae	1	0	brown
Calamus corneri	Calamus	corneri	Calameae	Calamoideae	1	0	green
Calamus cumingianus	Calamus	cumingianus	Calameae	Calamoideae	1	0	green
Calamus dasyacanthus	Calamus	dasyacanthus	Calameae	Calamoideae	0	1	yellow
Calamus deerratus	Calamus	deerratus	Calameae	Calamoideae	0	1	brown, orange
Calamus delessertianus	Calamus	delessertianus	Calameae	Calamoideae	0	1	yellow
Calamus delicatulus	Calamus	delicatulus	Calameae	Calamoideae	0	1	yellow
Calamus densiflorus	Calamus	densiflorus	Calameae	Calamoideae	1	0	green
Calamus dianbaiensis	Calamus	dianbaiensis	Calameae	Calamoideae	1	0	brown
Calamus didymocarpus	Calamus	didymocarpus	Calameae	Calamoideae	1	0	green
Calamus diepenhorstii	Calamus	diepenhorstii	Calameae	Calamoideae	1	0	brown
Calamus digitatus	Calamus	digitatus	Calameae	Calamoideae	0	1	yellow
Calamus dilaceratus	Calamus	dilaceratus	Calameae	Calamoideae	0	1	yellow
Calamus dimorphacanthus	Calamus	dimorphacanthus	Calameae	Calamoideae	1	0	green
Calamus dioicus	Calamus	dioicus	Calameae	Calamoideae	1	0	white
Calamus divaricatus	Calamus	divaricatus	Calameae	Calamoideae	1	0	brown, purple
Calamus dongnaiensis	Calamus	dongnaiensis	Calameae	Calamoideae	1	0	brown
Calamus dransfieldii	Calamus	dransfieldii	Calameae	Calamoideae	0	1	yellow
Calamus egregius	Calamus	egregius	Calameae	Calamoideae	1	0	brown
Calamus erectus	Calamus	erectus	Calameae	Calamoideae	1	0	brown
Calamus erinaceus	Calamus	erinaceus	Calameae	Calamoideae	1	0	grey, green
Calamus erioacanthus	Calamus	erioacanthus	Calameae	Calamoideae	1	0	straw-coloured
Calamus exilis	Calamus	exilis	Calameae	Calamoideae	1	0	brown
Calamus faberi	Calamus	faberi	Calameae	Calamoideae	0	1	yellow
Calamus fertilis	Calamus	fertilis	Calameae	Calamoideae	1	0	white
Calamus filipendulus	Calamus	filipendulus	Calameae	Calamoideae	1	0	cream, straw-coloured
Calamus flabellatus	Calamus	flabellatus	Calameae	Calamoideae	1	0	green
Calamus flagellum	Calamus	flagellum	Calameae	Calamoideae	0	1	yellow, brown
Calamus floribundus	Calamus	floribundus	Calameae	Calamoideae	0	1	yellow
Calamus formosanus	Calamus	formosanus	Calameae	Calamoideae	0	1	brown, yellow
Calamus gamblei	Calamus	gamblei	Calameae	Calamoideae	0	1	yellow
Calamus gibbsianus	Calamus	gibbsianus	Calameae	Calamoideae	1	0	brown
Calamus godefroyi	Calamus	godefroyi	Calameae	Calamoideae	0	1	yellow, white
Calamus gonospermus	Calamus	gonospermus	Calameae	Calamoideae	1	0	brown
Calamus gracilis	Calamus	gracilis	Calameae	Calamoideae	0	1	orange
Calamus griseus	Calamus	griseus	Calameae	Calamoideae	0	1	brown, yellow
Calamus guruba	Calamus	guruba	Calameae	Calamoideae	0	1	yellow, brown
Calamus harmandii	Calamus	harmandii	Calameae	Calamoideae	0	1	brown, yellow
Calamus henryanus	Calamus	henryanus	Calameae	Calamoideae	1	0	brown, straw-coloured
Calamus heteroideus	Calamus	heteroideus	Calameae	Calamoideae	1	0	white, grey
Calamus hispidulus	Calamus	hispidulus	Calameae	Calamoideae	1	0	green, purple
Calamus holttumii	Calamus	holttumii	Calameae	Calamoideae	1	0	green, brown
Calamus hookerianus	Calamus	hookerianus	Calameae	Calamoideae	1	0	brown
Calamus insignis	Calamus	insignis	Calameae	Calamoideae	1	0	brown
Calamus javensis	Calamus	javensis	Calameae	Calamoideae	1	0	white
Calamus jenningsianus	Calamus	jenningsianus	Calameae	Calamoideae	1	0	purple, white
Calamus karnatakensis	Calamus	karnatakensis	Calameae	Calamoideae	0	1	yellow
Calamus karuensis	Calamus	karuensis	Calameae	Calamoideae	1	0	black
Calamus kiahii	Calamus	kiahii	Calameae	Calamoideae	1	0	grey, green, brown
Calamus kingianus	Calamus	kingianus	Calameae	Calamoideae	0	1	yellow
Calamus kontumensis	Calamus	kontumensis	Calameae	Calamoideae	0	1	orange
Calamus lacciferus	Calamus	lacciferus	Calameae	Calamoideae	0	1	yellow
Calamus laevigatus	Calamus	laevigatus	Calameae	Calamoideae	1	0	brown
Calamus lakshmanae	Calamus	lakshmanae	Calameae	Calamoideae	0	1	yellow
Calamus laoensis	Calamus	laoensis	Calameae	Calamoideae	1	0	brown
Calamus lateralis	Calamus	lateralis	Calameae	Calamoideae	1	0	brown
Calamus latifolius	Calamus	latifolius	Calameae	Calamoideae	1	0	brown
Calamus leloi	Calamus	leloi	Calameae	Calamoideae	1	0	brown
Calamus leptospadix	Calamus	leptospadix	Calameae	Calamoideae	1	0	white
Calamus leptostachys	Calamus	leptostachys	Calameae	Calamoideae	1	0	white
Calamus lobbianus	Calamus	lobbianus	Calameae	Calamoideae	1	0	brown, grey, black
Calamus longipinna	Calamus	longipinna	Calameae	Calamoideae	1	0	green
Calamus longisetus	Calamus	longisetus	Calameae	Calamoideae	1	0	brown
Calamus longispathus	Calamus	longispathus	Calameae	Calamoideae	1	0	green
Calamus luridus	Calamus	luridus	Calameae	Calamoideae	1	0	brown
Calamus macrochlamys	Calamus	macrochlamys	Calameae	Calamoideae	1	0	brown
Calamus macrorhynchus	Calamus	macrorhynchus	Calameae	Calamoideae	1	0	brown
Calamus macrosphaerion	Calamus	macrosphaerion	Calameae	Calamoideae	1	0	white
Calamus malawaliensis	Calamus	malawaliensis	Calameae	Calamoideae	1	0	straw-coloured
Calamus manan	Calamus	manan	Calameae	Calamoideae	0	1	yellow
Calamus manillensis	Calamus	manillensis	Calameae	Calamoideae	1	0	brown
Calamus marginatus	Calamus	marginatus	Calameae	Calamoideae	1	0	brown
Calamus mattanensis	Calamus	mattanensis	Calameae	Calamoideae	0	1	green, yellow, brown
Calamus meghalayensis	Calamus	meghalayensis	Calameae	Calamoideae	0	1	yellow
Calamus melanochrous	Calamus	melanochrous	Calameae	Calamoideae	1	0	black
Calamus merrillii	Calamus	merrillii	Calameae	Calamoideae	1	0	white, grey, green
Calamus mesilauensis	Calamus	mesilauensis	Calameae	Calamoideae	0	1	brown, red
Calamus metzianus	Calamus	metzianus	Calameae	Calamoideae	0	1	yellow
Calamus micranthus	Calamus	micranthus	Calameae	Calamoideae	1	0	green
Calamus microcarpus	Calamus	microcarpus	Calameae	Calamoideae	1	0	white
Calamus microsphaerion	Calamus	microsphaerion	Calameae	Calamoideae	1	0	green, brown
Calamus minutus	Calamus	minutus	Calameae	Calamoideae	1	0	brown
Calamus mitis	Calamus	mitis	Calameae	Calamoideae	1	0	white
Calamus modestus	Calamus	modestus	Calameae	Calamoideae	1	0	brown
Calamus moti	Calamus	moti	Calameae	Calamoideae	0	1	cream, yellow
Calamus muelleri	Calamus	muelleri	Calameae	Calamoideae	0	1	yellow
Calamus multispicatus	Calamus	multispicatus	Calameae	Calamoideae	1	0	brown
Calamus muricatus	Calamus	muricatus	Calameae	Calamoideae	1	0	brown
Calamus myriacanthus	Calamus	myriacanthus	Calameae	Calamoideae	1	0	brown
Calamus nagbettai	Calamus	nagbettai	Calameae	Calamoideae	1	0	brown
Calamus nambariensis	Calamus	nambariensis	Calameae	Calamoideae	1	0	brown
Calamus nanodendron	Calamus	nanodendron	Calameae	Calamoideae	1	0	straw-coloured
Calamus neelagiricus	Calamus	neelagiricus	Calameae	Calamoideae	0	1	yellow
Calamus nematospadix	Calamus	nematospadix	Calameae	Calamoideae	1	0	ivory, white
Calamus oligostachys	Calamus	oligostachys	Calameae	Calamoideae	0	1	yellow
Calamus optimus	Calamus	optimus	Calameae	Calamoideae	1	0	brown
Calamus ornatus	Calamus	ornatus	Calameae	Calamoideae	1	0	black, brown
Calamus ovoideus	Calamus	ovoideus	Calameae	Calamoideae	1	0	green
Calamus oxleyanus	Calamus	oxleyanus	Calameae	Calamoideae	1	0	brown
Calamus oxycarpus	Calamus	oxycarpus	Calameae	Calamoideae	1	0	brown
Calamus pachypus	Calamus	pachypus	Calameae	Calamoideae	1	0	white
Calamus pachystemonus	Calamus	pachystemonus	Calameae	Calamoideae	1	0	brown
Calamus palustris	Calamus	palustris	Calameae	Calamoideae	1	0	white
Calamus pandanosmus	Calamus	pandanosmus	Calameae	Calamoideae	1	0	brown
Calamus paspalanthus	Calamus	paspalanthus	Calameae	Calamoideae	1	0	brown
Calamus paulii	Calamus	paulii	Calameae	Calamoideae	1	0	brown
Calamus perakensis	Calamus	perakensis	Calameae	Calamoideae	1	0	purple
Calamus peregrinus	Calamus	peregrinus	Calameae	Calamoideae	1	0	brown
Calamus pilosellus	Calamus	pilosellus	Calameae	Calamoideae	0	1	orange, yellow
Calamus platyspathus	Calamus	platyspathus	Calameae	Calamoideae	1	0	white
Calamus poensis	Calamus	poensis	Calameae	Calamoideae	1	0	brown
Calamus pogonacanthus	Calamus	pogonacanthus	Calameae	Calamoideae	1	0	straw-coloured
Calamus poilanei	Calamus	poilanei	Calameae	Calamoideae	1	0	brown
Calamus polystachys	Calamus	polystachys	Calameae	Calamoideae	1	0	ivory
Calamus praetermissus	Calamus	praetermissus	Calameae	Calamoideae	1	0	brown
Calamus prasinus	Calamus	prasinus	Calameae	Calamoideae	0	1	yellow
Calamus pseudofeanus	Calamus	pseudofeanus	Calameae	Calamoideae	0	1	yellow
Calamus pseudorivalis	Calamus	pseudorivalis	Calameae	Calamoideae	0	1	yellow
Calamus pseudotenuis	Calamus	pseudotenuis	Calameae	Calamoideae	0	1	yellow, white
Calamus pseudoulur	Calamus	pseudoulur	Calameae	Calamoideae	1	0	brown
Calamus psilocladus	Calamus	psilocladus	Calameae	Calamoideae	1	0	ivory
Calamus pycnocarpus	Calamus	pycnocarpus	Calameae	Calamoideae	0	1	orange, yellow, brown
Calamus pygmaeus	Calamus	pygmaeus	Calameae	Calamoideae	1	0	straw-coloured, brown
Calamus radiatus	Calamus	radiatus	Calameae	Calamoideae	0	1	yellow
Calamus radicalis	Calamus	radicalis	Calameae	Calamoideae	1	0	cream, brown
Calamus reticulatus	Calamus	reticulatus	Calameae	Calamoideae	1	0	cream
Calamus reyesianus	Calamus	reyesianus	Calameae	Calamoideae	1	0	white
Calamus rhabdocladus	Calamus	rhabdocladus	Calameae	Calamoideae	0	1	red, yellow
Calamus rheedei	Calamus	rheedei	Calameae	Calamoideae	1	0	brown
Calamus rhomboideus	Calamus	rhomboideus	Calameae	Calamoideae	0	1	orange
Calamus rotang	Calamus	rotang	Calameae	Calamoideae	0	1	orange, red, purple, black
Calamus rudentum	Calamus	rudentum	Calameae	Calamoideae	0	1	yellow
Calamus sabalensis	Calamus	sabalensis	Calameae	Calamoideae	1	0	brown
Calamus salicifolius	Calamus	salicifolius	Calameae	Calamoideae	1	0	brown
Calamus sarawakensis	Calamus	sarawakensis	Calameae	Calamoideae	1	0	brown
Calamus schistoacanthus	Calamus	schistoacanthus	Calameae	Calamoideae	1	0	straw-coloured, brown
Calamus scipionum	Calamus	scipionum	Calameae	Calamoideae	1	0	green
Calamus sedens	Calamus	sedens	Calameae	Calamoideae	1	0	brown
Calamus semierectus	Calamus	semierectus	Calameae	Calamoideae	1	0	brown
Calamus semoi	Calamus	semoi	Calameae	Calamoideae	0	1	orange, red
Calamus shendurunii	Calamus	shendurunii	Calameae	Calamoideae	1	0	green
Calamus siamensis	Calamus	siamensis	Calameae	Calamoideae	0	1	white, yellow
Calamus simplex	Calamus	simplex	Calameae	Calamoideae	1	0	brown
Calamus simplicifolius	Calamus	simplicifolius	Calameae	Calamoideae	0	1	yellow
Calamus siphonospathus	Calamus	siphonospathus	Calameae	Calamoideae	1	0	brown
Calamus solitarius	Calamus	solitarius	Calameae	Calamoideae	0	1	yellow
Calamus speciosissimus	Calamus	speciosissimus	Calameae	Calamoideae	1	0	green
Calamus spectatissimus	Calamus	spectatissimus	Calameae	Calamoideae	1	0	brown
Calamus spiralis	Calamus	spiralis	Calameae	Calamoideae	0	1	red
Calamus stoloniferus	Calamus	stoloniferus	Calameae	Calamoideae	0	1	yellow
Calamus subinermis	Calamus	subinermis	Calameae	Calamoideae	1	0	ivory
Calamus symphysipus	Calamus	symphysipus	Calameae	Calamoideae	1	0	straw-coloured, green
Calamus temii	Calamus	temii	Calameae	Calamoideae	1	0	brown
Calamus tenompokensis	Calamus	tenompokensis	Calameae	Calamoideae	1	0	brown
Calamus tenuis	Calamus	tenuis	Calameae	Calamoideae	1	0	brown
Calamus tetradactyloides	Calamus	tetradactyloides	Calameae	Calamoideae	1	0	white
Calamus tetradactylus	Calamus	tetradactylus	Calameae	Calamoideae	0	1	yellow
Calamus thwaitesii	Calamus	thwaitesii	Calameae	Calamoideae	0	1	orange, brown
Calamus thysanolepis	Calamus	thysanolepis	Calameae	Calamoideae	1	0	brown
Calamus tomentosus	Calamus	tomentosus	Calameae	Calamoideae	1	0	brown
Calamus trachycoleus	Calamus	trachycoleus	Calameae	Calamoideae	1	0	white
Calamus travancoricus	Calamus	travancoricus	Calameae	Calamoideae	1	0	brown
Calamus tumidus	Calamus	tumidus	Calameae	Calamoideae	1	0	green
Calamus unifarius	Calamus	unifarius	Calameae	Calamoideae	1	0	white
Calamus usitatus	Calamus	usitatus	Calameae	Calamoideae	1	0	straw-coloured
Calamus vattayila	Calamus	vattayila	Calameae	Calamoideae	0	1	yellow
Calamus vestitus	Calamus	vestitus	Calameae	Calamoideae	0	1	cream, white, yellow
Calamus viminalis	Calamus	viminalis	Calameae	Calamoideae	0	1	yellow
Calamus viridispinus	Calamus	viridispinus	Calameae	Calamoideae	1	0	brown
Calamus vitiensis	Calamus	vitiensis	Calameae	Calamoideae	1	0	white
Calamus wailong	Calamus	wailong	Calameae	Calamoideae	1	0	ivory
Calamus walkeri	Calamus	walkeri	Calameae	Calamoideae	0	1	yellow
Calamus warburgii	Calamus	warburgii	Calameae	Calamoideae	1	0	white, cream
Calamus wightii	Calamus	wightii	Calameae	Calamoideae	1	0	brown, black
Calamus wuliangshanensis	Calamus	wuliangshanensis	Calameae	Calamoideae	1	0	brown
Calamus zebrinus	Calamus	zebrinus	Calameae	Calamoideae	1	0	brown
Calamus zollingeri	Calamus	zollingeri	Calameae	Calamoideae	1	0	brown
Calamus zonatus	Calamus	zonatus	Calameae	Calamoideae	1	0	white
Calyptrocalyx albertisianus	Calyptrocalyx	albertisianus	Areceae	Arecoideae	0	1	red
Calyptrocalyx amoenus	Calyptrocalyx	amoenus	Areceae	Arecoideae	0	1	red
Calyptrocalyx arfakianus	Calyptrocalyx	arfakianus	Areceae	Arecoideae	1	0	black
Calyptrocalyx awa	Calyptrocalyx	awa	Areceae	Arecoideae	0	1	orange
Calyptrocalyx caudiculatus	Calyptrocalyx	caudiculatus	Areceae	Arecoideae	0	1	red, purple, black
Calyptrocalyx doxanthus	Calyptrocalyx	doxanthus	Areceae	Arecoideae	0	1	red
Calyptrocalyx elegans	Calyptrocalyx	elegans	Areceae	Arecoideae	0	1	red
Calyptrocalyx flabellatus	Calyptrocalyx	flabellatus	Areceae	Arecoideae	0	1	orange, red
Calyptrocalyx forbesii	Calyptrocalyx	forbesii	Areceae	Arecoideae	0	1	orange, red
Calyptrocalyx geonomiformis	Calyptrocalyx	geonomiformis	Areceae	Arecoideae	0	1	orange
Calyptrocalyx hollrungii	Calyptrocalyx	hollrungii	Areceae	Arecoideae	0	1	orange, red
Calyptrocalyx julianettii	Calyptrocalyx	julianettii	Areceae	Arecoideae	0	1	red
Calyptrocalyx lauterbachianus	Calyptrocalyx	lauterbachianus	Areceae	Arecoideae	0	1	red
Calyptrocalyx laxiflorus	Calyptrocalyx	laxiflorus	Areceae	Arecoideae	0	1	red
Calyptrocalyx lepidotus	Calyptrocalyx	lepidotus	Areceae	Arecoideae	0	1	red
Calyptrocalyx leptostachys	Calyptrocalyx	leptostachys	Areceae	Arecoideae	1	0	purple, black
Calyptrocalyx merrillianus	Calyptrocalyx	merrillianus	Areceae	Arecoideae	0	1	red, purple, black
Calyptrocalyx micholitzii	Calyptrocalyx	micholitzii	Areceae	Arecoideae	0	1	red
Calyptrocalyx multifidus	Calyptrocalyx	multifidus	Areceae	Arecoideae	0	1	red
Calyptrocalyx pachystachys	Calyptrocalyx	pachystachys	Areceae	Arecoideae	0	1	orange, red
Calyptrocalyx pauciflorus	Calyptrocalyx	pauciflorus	Areceae	Arecoideae	0	1	red
Calyptrocalyx polyphyllus	Calyptrocalyx	polyphyllus	Areceae	Arecoideae	0	1	red
Calyptrocalyx pusillus	Calyptrocalyx	pusillus	Areceae	Arecoideae	0	1	red
Calyptrocalyx sessiliflorus	Calyptrocalyx	sessiliflorus	Areceae	Arecoideae	0	1	red
Calyptrocalyx spicatus	Calyptrocalyx	spicatus	Areceae	Arecoideae	0	1	orange, red
Calyptrocalyx yamutumene	Calyptrocalyx	yamutumene	Areceae	Arecoideae	0	1	red
Calyptrogyne allenii	Calyptrogyne	allenii	Geonomateae	Arecoideae	1	0	green, black
Calyptrogyne anomala	Calyptrogyne	anomala	Geonomateae	Arecoideae	1	0	black
Calyptrogyne baudensis	Calyptrogyne	baudensis	Geonomateae	Arecoideae	1	0	black
Calyptrogyne condensata	Calyptrogyne	condensata	Geonomateae	Arecoideae	1	0	brown
Calyptrogyne costatifrons	Calyptrogyne	costatifrons	Geonomateae	Arecoideae	1	0	black
Calyptrogyne ghiesbreghtiana	Calyptrogyne	ghiesbreghtiana	Geonomateae	Arecoideae	1	0	black
Calyptrogyne kunorum	Calyptrogyne	kunorum	Geonomateae	Arecoideae	1	0	brown
Calyptrogyne osensis	Calyptrogyne	osensis	Geonomateae	Arecoideae	1	0	black
Calyptrogyne panamensis	Calyptrogyne	panamensis	Geonomateae	Arecoideae	1	0	black
Calyptrogyne pubescens	Calyptrogyne	pubescens	Geonomateae	Arecoideae	1	0	black
Calyptrogyne sanblasensis	Calyptrogyne	sanblasensis	Geonomateae	Arecoideae	0	1	yellow
Calyptrogyne trichostachys	Calyptrogyne	trichostachys	Geonomateae	Arecoideae	1	0	purple, black
Calyptrogyne tutensis	Calyptrogyne	tutensis	Geonomateae	Arecoideae	1	0	purple
Calyptronoma plumeriana	Calyptronoma	plumeriana	Geonomateae	Arecoideae	1	0	purple
Calyptronoma rivalis	Calyptronoma	rivalis	Geonomateae	Arecoideae	0	1	red
Carpentaria acuminata	Carpentaria	acuminata	Areceae	Arecoideae	0	1	red
Carpoxylon macrospermum	Carpoxylon	macrospermum	Areceae	Arecoideae	0	1	orange
Caryota albertii	Caryota	albertii	Caryoteae	Coryphoideae	0	1	red
Caryota cumingii	Caryota	cumingii	Caryoteae	Coryphoideae	1	0	purple, black
Caryota maxima	Caryota	maxima	Caryoteae	Coryphoideae	0	1	red
Caryota mitis	Caryota	mitis	Caryoteae	Coryphoideae	0	1	purple, black, red
Caryota monostachya	Caryota	monostachya	Caryoteae	Coryphoideae	1	0	purple
Caryota no	Caryota	no	Caryoteae	Coryphoideae	1	0	black
Caryota obtusa	Caryota	obtusa	Caryoteae	Coryphoideae	0	1	red, orange
Caryota ophiopellis	Caryota	ophiopellis	Caryoteae	Coryphoideae	0	1	red
Caryota rumphiana	Caryota	rumphiana	Caryoteae	Coryphoideae	1	0	black
Caryota sympetala	Caryota	sympetala	Caryoteae	Coryphoideae	1	0	purple
Caryota urens	Caryota	urens	Caryoteae	Coryphoideae	1	0	purple
Ceratolobus concolor	Ceratolobus	concolor	Calameae	Calamoideae	1	0	brown
Ceratolobus discolor	Ceratolobus	discolor	Calameae	Calamoideae	1	0	brown
Ceratolobus glaucescens	Ceratolobus	glaucescens	Calameae	Calamoideae	1	0	brown
Ceratolobus pseudoconcolor	Ceratolobus	pseudoconcolor	Calameae	Calamoideae	1	0	brown
Ceratolobus subangulatus	Ceratolobus	subangulatus	Calameae	Calamoideae	1	0	brown
Ceroxylon alpinum	Ceroxylon	alpinum	Ceroxyleae	Ceroxyloideae	0	1	red
Ceroxylon amazonicum	Ceroxylon	amazonicum	Ceroxyleae	Ceroxyloideae	0	1	red
Ceroxylon ceriferum	Ceroxylon	ceriferum	Ceroxyleae	Ceroxyloideae	0	1	orange, red
Ceroxylon echinulatum	Ceroxylon	echinulatum	Ceroxyleae	Ceroxyloideae	0	1	orange, red
Ceroxylon parvifrons	Ceroxylon	parvifrons	Ceroxyleae	Ceroxyloideae	0	1	orange, red
Ceroxylon parvum	Ceroxylon	parvum	Ceroxyleae	Ceroxyloideae	0	1	orange, red
Ceroxylon peruvianum	Ceroxylon	peruvianum	Ceroxyleae	Ceroxyloideae	0	1	green, red
Ceroxylon quindiuense	Ceroxylon	quindiuense	Ceroxyleae	Ceroxyloideae	0	1	orange, red
Ceroxylon sasaimae	Ceroxylon	sasaimae	Ceroxyleae	Ceroxyloideae	0	1	orange, red
Ceroxylon ventricosum	Ceroxylon	ventricosum	Ceroxyleae	Ceroxyloideae	0	1	orange, red
Ceroxylon vogelianum	Ceroxylon	vogelianum	Ceroxyleae	Ceroxyloideae	0	1	red, orange, green
Chamaedorea adscendens	Chamaedorea	adscendens	Chamaedoreeae	Arecoideae	1	0	black
Chamaedorea allenii	Chamaedorea	allenii	Chamaedoreeae	Arecoideae	1	0	black
Chamaedorea alternans	Chamaedorea	alternans	Chamaedoreeae	Arecoideae	1	0	black
Chamaedorea amabilis	Chamaedorea	amabilis	Chamaedoreeae	Arecoideae	1	0	black
Chamaedorea anemophila	Chamaedorea	anemophila	Chamaedoreeae	Arecoideae	1	0	black
Chamaedorea angustisecta	Chamaedorea	angustisecta	Chamaedoreeae	Arecoideae	1	0	black
Chamaedorea arenbergiana	Chamaedorea	arenbergiana	Chamaedoreeae	Arecoideae	1	0	black
Chamaedorea atrovirens	Chamaedorea	atrovirens	Chamaedoreeae	Arecoideae	0	1	red
Chamaedorea benziei	Chamaedorea	benziei	Chamaedoreeae	Arecoideae	1	0	black
Chamaedorea binderi	Chamaedorea	binderi	Chamaedoreeae	Arecoideae	1	0	black
Chamaedorea brachyclada	Chamaedorea	brachyclada	Chamaedoreeae	Arecoideae	1	0	black
Chamaedorea brachypoda	Chamaedorea	brachypoda	Chamaedoreeae	Arecoideae	1	0	black
Chamaedorea carchensis	Chamaedorea	carchensis	Chamaedoreeae	Arecoideae	1	0	black
Chamaedorea castillo-montii	Chamaedorea	castillo-montii	Chamaedoreeae	Arecoideae	1	0	black
Chamaedorea cataractarum	Chamaedorea	cataractarum	Chamaedoreeae	Arecoideae	1	0	black
Chamaedorea christinae	Chamaedorea	christinae	Chamaedoreeae	Arecoideae	1	0	black
Chamaedorea correae	Chamaedorea	correae	Chamaedoreeae	Arecoideae	1	0	black
Chamaedorea costaricana	Chamaedorea	costaricana	Chamaedoreeae	Arecoideae	1	0	black
Chamaedorea crucensis	Chamaedorea	crucensis	Chamaedoreeae	Arecoideae	0	1	red, black
Chamaedorea dammeriana	Chamaedorea	dammeriana	Chamaedoreeae	Arecoideae	1	0	black
Chamaedorea deckeriana	Chamaedorea	deckeriana	Chamaedoreeae	Arecoideae	1	0	black
Chamaedorea deneversiana	Chamaedorea	deneversiana	Chamaedoreeae	Arecoideae	1	0	black
Chamaedorea elatior	Chamaedorea	elatior	Chamaedoreeae	Arecoideae	1	0	black
Chamaedorea elegans	Chamaedorea	elegans	Chamaedoreeae	Arecoideae	1	0	black
Chamaedorea ernesti-augusti	Chamaedorea	ernesti-augusti	Chamaedoreeae	Arecoideae	1	0	black
Chamaedorea falcifera	Chamaedorea	falcifera	Chamaedoreeae	Arecoideae	0	1	orange, red
Chamaedorea foveata	Chamaedorea	foveata	Chamaedoreeae	Arecoideae	1	0	black
Chamaedorea fractiflexa	Chamaedorea	fractiflexa	Chamaedoreeae	Arecoideae	1	0	black
Chamaedorea fragrans	Chamaedorea	fragrans	Chamaedoreeae	Arecoideae	1	0	black
Chamaedorea frondosa	Chamaedorea	frondosa	Chamaedoreeae	Arecoideae	1	0	black
Chamaedorea geonomiformis	Chamaedorea	geonomiformis	Chamaedoreeae	Arecoideae	1	0	black
Chamaedorea glaucifolia	Chamaedorea	glaucifolia	Chamaedoreeae	Arecoideae	1	0	black
Chamaedorea graminifolia	Chamaedorea	graminifolia	Chamaedoreeae	Arecoideae	1	0	black
Chamaedorea guntheriana	Chamaedorea	guntheriana	Chamaedoreeae	Arecoideae	1	0	black
Chamaedorea hodelii	Chamaedorea	hodelii	Chamaedoreeae	Arecoideae	1	0	purple, black
Chamaedorea hooperiana	Chamaedorea	hooperiana	Chamaedoreeae	Arecoideae	1	0	black
Chamaedorea ibarrae	Chamaedorea	ibarrae	Chamaedoreeae	Arecoideae	1	0	black
Chamaedorea incrustata	Chamaedorea	incrustata	Chamaedoreeae	Arecoideae	1	0	black
Chamaedorea keelerorum	Chamaedorea	keelerorum	Chamaedoreeae	Arecoideae	1	0	black
Chamaedorea klotzschiana	Chamaedorea	klotzschiana	Chamaedoreeae	Arecoideae	1	0	black
Chamaedorea lehmannii	Chamaedorea	lehmannii	Chamaedoreeae	Arecoideae	1	0	black
Chamaedorea liebmannii	Chamaedorea	liebmannii	Chamaedoreeae	Arecoideae	1	0	black
Chamaedorea linearis	Chamaedorea	linearis	Chamaedoreeae	Arecoideae	0	1	orange, red
Chamaedorea lucidifrons	Chamaedorea	lucidifrons	Chamaedoreeae	Arecoideae	0	1	orange, black
Chamaedorea macrospadix	Chamaedorea	macrospadix	Chamaedoreeae	Arecoideae	1	0	black
Chamaedorea matae	Chamaedorea	matae	Chamaedoreeae	Arecoideae	1	0	black
Chamaedorea metallica	Chamaedorea	metallica	Chamaedoreeae	Arecoideae	1	0	black
Chamaedorea microphylla	Chamaedorea	microphylla	Chamaedoreeae	Arecoideae	1	0	black
Chamaedorea microspadix	Chamaedorea	microspadix	Chamaedoreeae	Arecoideae	0	1	orange, red
Chamaedorea moliniana	Chamaedorea	moliniana	Chamaedoreeae	Arecoideae	1	0	black
Chamaedorea nationsiana	Chamaedorea	nationsiana	Chamaedoreeae	Arecoideae	1	0	black
Chamaedorea neurochlamys	Chamaedorea	neurochlamys	Chamaedoreeae	Arecoideae	0	1	yellow, orange, red, brown
Chamaedorea nubium	Chamaedorea	nubium	Chamaedoreeae	Arecoideae	1	0	black
Chamaedorea oblongata	Chamaedorea	oblongata	Chamaedoreeae	Arecoideae	1	0	black
Chamaedorea oreophila	Chamaedorea	oreophila	Chamaedoreeae	Arecoideae	0	1	yellow, red
Chamaedorea pachecoana	Chamaedorea	pachecoana	Chamaedoreeae	Arecoideae	1	0	black
Chamaedorea palmeriana	Chamaedorea	palmeriana	Chamaedoreeae	Arecoideae	1	0	black
Chamaedorea parvifolia	Chamaedorea	parvifolia	Chamaedoreeae	Arecoideae	1	0	black
Chamaedorea parvisecta	Chamaedorea	parvisecta	Chamaedoreeae	Arecoideae	1	0	black
Chamaedorea pauciflora	Chamaedorea	pauciflora	Chamaedoreeae	Arecoideae	1	0	black
Chamaedorea pedunculata	Chamaedorea	pedunculata	Chamaedoreeae	Arecoideae	1	0	black
Chamaedorea pinnatifrons	Chamaedorea	pinnatifrons	Chamaedoreeae	Arecoideae	1	0	black
Chamaedorea piscifolia	Chamaedorea	piscifolia	Chamaedoreeae	Arecoideae	1	0	black
Chamaedorea pittieri	Chamaedorea	pittieri	Chamaedoreeae	Arecoideae	1	0	black
Chamaedorea plumosa	Chamaedorea	plumosa	Chamaedoreeae	Arecoideae	1	0	black
Chamaedorea pochutlensis	Chamaedorea	pochutlensis	Chamaedoreeae	Arecoideae	1	0	black
Chamaedorea ponderosa	Chamaedorea	ponderosa	Chamaedoreeae	Arecoideae	0	1	orange
Chamaedorea pumila	Chamaedorea	pumila	Chamaedoreeae	Arecoideae	1	0	black
Chamaedorea pygmaea	Chamaedorea	pygmaea	Chamaedoreeae	Arecoideae	1	0	black
Chamaedorea queroana	Chamaedorea	queroana	Chamaedoreeae	Arecoideae	1	0	black
Chamaedorea radicalis	Chamaedorea	radicalis	Chamaedoreeae	Arecoideae	0	1	red
Chamaedorea ricardoi	Chamaedorea	ricardoi	Chamaedoreeae	Arecoideae	1	0	black
Chamaedorea rigida	Chamaedorea	rigida	Chamaedoreeae	Arecoideae	1	0	black
Chamaedorea robertii	Chamaedorea	robertii	Chamaedoreeae	Arecoideae	1	0	black
Chamaedorea rojasiana	Chamaedorea	rojasiana	Chamaedoreeae	Arecoideae	1	0	purple, black
Chamaedorea rossteniorum	Chamaedorea	rossteniorum	Chamaedoreeae	Arecoideae	1	0	black
Chamaedorea sartorii	Chamaedorea	sartorii	Chamaedoreeae	Arecoideae	1	0	black
Chamaedorea scheryi	Chamaedorea	scheryi	Chamaedoreeae	Arecoideae	1	0	black
Chamaedorea schiedeana	Chamaedorea	schiedeana	Chamaedoreeae	Arecoideae	1	0	black
Chamaedorea schippii	Chamaedorea	schippii	Chamaedoreeae	Arecoideae	1	0	black
Chamaedorea seifrizii	Chamaedorea	seifrizii	Chamaedoreeae	Arecoideae	1	0	black
Chamaedorea simplex	Chamaedorea	simplex	Chamaedoreeae	Arecoideae	1	0	black
Chamaedorea skutchii	Chamaedorea	skutchii	Chamaedoreeae	Arecoideae	1	0	black
Chamaedorea smithii	Chamaedorea	smithii	Chamaedoreeae	Arecoideae	0	1	red
Chamaedorea stenocarpa	Chamaedorea	stenocarpa	Chamaedoreeae	Arecoideae	1	0	black
Chamaedorea stolonifera	Chamaedorea	stolonifera	Chamaedoreeae	Arecoideae	1	0	black
Chamaedorea stricta	Chamaedorea	stricta	Chamaedoreeae	Arecoideae	1	0	black
Chamaedorea tenerrima	Chamaedorea	tenerrima	Chamaedoreeae	Arecoideae	1	0	black
Chamaedorea tepejilote	Chamaedorea	tepejilote	Chamaedoreeae	Arecoideae	1	0	black
Chamaedorea tuerckheimii	Chamaedorea	tuerckheimii	Chamaedoreeae	Arecoideae	1	0	black
Chamaedorea undulatifolia	Chamaedorea	undulatifolia	Chamaedoreeae	Arecoideae	1	0	black
Chamaedorea verapazensis	Chamaedorea	verapazensis	Chamaedoreeae	Arecoideae	1	0	black
Chamaedorea verecunda	Chamaedorea	verecunda	Chamaedoreeae	Arecoideae	1	0	black
Chamaedorea volcanensis	Chamaedorea	volcanensis	Chamaedoreeae	Arecoideae	1	0	black
Chamaedorea vulgata	Chamaedorea	vulgata	Chamaedoreeae	Arecoideae	1	0	black
Chamaedorea warscewiczii	Chamaedorea	warscewiczii	Chamaedoreeae	Arecoideae	1	0	black
Chamaedorea whitelockiana	Chamaedorea	whitelockiana	Chamaedoreeae	Arecoideae	1	0	black
Chamaedorea woodsoniana	Chamaedorea	woodsoniana	Chamaedoreeae	Arecoideae	1	0	black
Chamaedorea zamorae	Chamaedorea	zamorae	Chamaedoreeae	Arecoideae	0	1	red, black
Chamaerops humilis	Chamaerops	humilis	Trachycarpeae	Coryphoideae	1	0	brown
Chambeyronia lepidota	Chambeyronia	lepidota	Areceae	Arecoideae	0	1	red
Chambeyronia macrocarpa	Chambeyronia	macrocarpa	Areceae	Arecoideae	0	1	red
Chelyocarpus chuco	Chelyocarpus	chuco	Cryosophileae	Coryphoideae	1	0	brown
Chelyocarpus dianeurus	Chelyocarpus	dianeurus	Cryosophileae	Coryphoideae	0	1	green, yellow, white
Chelyocarpus repens	Chelyocarpus	repens	Cryosophileae	Coryphoideae	1	0	green
Chelyocarpus ulei	Chelyocarpus	ulei	Cryosophileae	Coryphoideae	1	0	brown
Chuniophoenix hainanensis	Chuniophoenix	hainanensis	Chuniophoeniceae	Coryphoideae	0	1	red, orange, purple
Chuniophoenix humilis	Chuniophoenix	humilis	Chuniophoeniceae	Coryphoideae	0	1	red
Chuniophoenix nana	Chuniophoenix	nana	Chuniophoeniceae	Coryphoideae	0	1	red
Clinosperma bracteale	Clinosperma	bracteale	Areceae	Arecoideae	1	0	green
Clinosperma lanuginosa	Clinosperma	lanuginosa	Areceae	Arecoideae	1	0	green
Clinosperma macrocarpa	Clinosperma	macrocarpa	Areceae	Arecoideae	1	0	black
Clinosperma vaginata	Clinosperma	vaginata	Areceae	Arecoideae	0	1	red
Clinostigma collegarum	Clinostigma	collegarum	Areceae	Arecoideae	0	1	red
Clinostigma exorrhizum	Clinostigma	exorrhizum	Areceae	Arecoideae	0	1	red
Clinostigma harlandii	Clinostigma	harlandii	Areceae	Arecoideae	1	0	black
Clinostigma onchorhynchum	Clinostigma	onchorhynchum	Areceae	Arecoideae	1	0	purple, black
Clinostigma samoense	Clinostigma	samoense	Areceae	Arecoideae	1	0	black
Clinostigma savoryanum	Clinostigma	savoryanum	Areceae	Arecoideae	1	0	black
Coccothrinax alta	Coccothrinax	alta	Cryosophileae	Coryphoideae	1	0	black
Coccothrinax argentata	Coccothrinax	argentata	Cryosophileae	Coryphoideae	1	0	purple, black
Coccothrinax argentea	Coccothrinax	argentea	Cryosophileae	Coryphoideae	1	0	purple, black
Coccothrinax barbadensis	Coccothrinax	barbadensis	Cryosophileae	Coryphoideae	1	0	purple, black
Coccothrinax borhidiana	Coccothrinax	borhidiana	Cryosophileae	Coryphoideae	1	0	purple
Coccothrinax crinita	Coccothrinax	crinita	Cryosophileae	Coryphoideae	1	0	black
Coccothrinax ekmanii	Coccothrinax	ekmanii	Cryosophileae	Coryphoideae	0	1	yellow, brown, orange
Coccothrinax fragrans	Coccothrinax	fragrans	Cryosophileae	Coryphoideae	1	0	purple, black
Coccothrinax gundlachii	Coccothrinax	gundlachii	Cryosophileae	Coryphoideae	1	0	purple, black
Coccothrinax hioramii	Coccothrinax	hioramii	Cryosophileae	Coryphoideae	1	0	black
Coccothrinax inaguensis	Coccothrinax	inaguensis	Cryosophileae	Coryphoideae	1	0	purple
Coccothrinax jamaicensis	Coccothrinax	jamaicensis	Cryosophileae	Coryphoideae	1	0	black
Coccothrinax litoralis	Coccothrinax	litoralis	Cryosophileae	Coryphoideae	1	0	purple, black
Coccothrinax miraguama	Coccothrinax	miraguama	Cryosophileae	Coryphoideae	1	0	purple, black
Coccothrinax pauciramosa	Coccothrinax	pauciramosa	Cryosophileae	Coryphoideae	1	0	purple, black
Coccothrinax proctorii	Coccothrinax	proctorii	Cryosophileae	Coryphoideae	1	0	black
Coccothrinax readii	Coccothrinax	readii	Cryosophileae	Coryphoideae	1	0	black
Coccothrinax salvatoris	Coccothrinax	salvatoris	Cryosophileae	Coryphoideae	1	0	purple, black
Coccothrinax spissa	Coccothrinax	spissa	Cryosophileae	Coryphoideae	1	0	purple
Coccothrinax torrida	Coccothrinax	torrida	Cryosophileae	Coryphoideae	1	0	white
Colpothrinax cookii	Colpothrinax	cookii	Trachycarpeae	Coryphoideae	1	0	brown, black
Colpothrinax wrightii	Colpothrinax	wrightii	Trachycarpeae	Coryphoideae	1	0	brown, black
Copernicia alba	Copernicia	alba	Trachycarpeae	Coryphoideae	1	0	black
Copernicia baileyana	Copernicia	baileyana	Trachycarpeae	Coryphoideae	1	0	black
Copernicia berteroana	Copernicia	berteroana	Trachycarpeae	Coryphoideae	1	0	black
Copernicia brittonorum	Copernicia	brittonorum	Trachycarpeae	Coryphoideae	1	0	black
Copernicia cowellii	Copernicia	cowellii	Trachycarpeae	Coryphoideae	1	0	black
Copernicia curbeloi	Copernicia	curbeloi	Trachycarpeae	Coryphoideae	1	0	black
Copernicia ekmanii	Copernicia	ekmanii	Trachycarpeae	Coryphoideae	1	0	black
Copernicia gigas	Copernicia	gigas	Trachycarpeae	Coryphoideae	1	0	black
Copernicia glabrescens	Copernicia	glabrescens	Trachycarpeae	Coryphoideae	1	0	black
Copernicia hospita	Copernicia	hospita	Trachycarpeae	Coryphoideae	1	0	black
Copernicia macroglossa	Copernicia	macroglossa	Trachycarpeae	Coryphoideae	1	0	black
Copernicia prunifera	Copernicia	prunifera	Trachycarpeae	Coryphoideae	1	0	black
Copernicia rigida	Copernicia	rigida	Trachycarpeae	Coryphoideae	1	0	black
Copernicia tectorum	Copernicia	tectorum	Trachycarpeae	Coryphoideae	1	0	brown, black
Corypha lecomtei	Corypha	lecomtei	Corypheae	Coryphoideae	1	0	brown
Corypha taliera	Corypha	taliera	Corypheae	Coryphoideae	1	0	brown
Corypha umbraculifera	Corypha	umbraculifera	Corypheae	Coryphoideae	1	0	brown, green
Corypha utan	Corypha	utan	Corypheae	Coryphoideae	1	0	brown
Cryosophila bartlettii	Cryosophila	bartlettii	Cryosophileae	Coryphoideae	1	0	white
Cryosophila cookii	Cryosophila	cookii	Cryosophileae	Coryphoideae	1	0	white
Cryosophila grayumii	Cryosophila	grayumii	Cryosophileae	Coryphoideae	1	0	white
Cryosophila guagara	Cryosophila	guagara	Cryosophileae	Coryphoideae	1	0	white
Cryosophila kalbreyeri	Cryosophila	kalbreyeri	Cryosophileae	Coryphoideae	1	0	white
Cryosophila macrocarpa	Cryosophila	macrocarpa	Cryosophileae	Coryphoideae	1	0	white
Cryosophila nana	Cryosophila	nana	Cryosophileae	Coryphoideae	1	0	white
Cryosophila stauracantha	Cryosophila	stauracantha	Cryosophileae	Coryphoideae	1	0	white
Cryosophila warscewiczii	Cryosophila	warscewiczii	Cryosophileae	Coryphoideae	1	0	white
Cryosophila williamsii	Cryosophila	williamsii	Cryosophileae	Coryphoideae	1	0	white
Cyphokentia cerifera	Cyphokentia	cerifera	Areceae	Arecoideae	0	1	orange, red
Cyphokentia macrostachya	Cyphokentia	macrostachya	Areceae	Arecoideae	0	1	red
Cyphophoenix alba	Cyphophoenix	alba	Areceae	Arecoideae	1	0	green
Cyphophoenix elegans	Cyphophoenix	elegans	Areceae	Arecoideae	1	0	green
Cyphophoenix fulcita	Cyphophoenix	fulcita	Areceae	Arecoideae	1	0	black
Cyphophoenix nucele	Cyphophoenix	nucele	Areceae	Arecoideae	0	1	red
Cyphosperma balansae	Cyphosperma	balansae	Areceae	Arecoideae	0	1	brown, red
Cyphosperma naboutinense	Cyphosperma	naboutinense	Areceae	Arecoideae	0	1	orange
Cyphosperma tanga	Cyphosperma	tanga	Areceae	Arecoideae	0	1	yellow
Cyphosperma trichospadix	Cyphosperma	trichospadix	Areceae	Arecoideae	0	1	yellow
Cyphosperma voutmelense	Cyphosperma	voutmelense	Areceae	Arecoideae	1	0	green
Cyrtostachys bakeri	Cyrtostachys	bakeri	Areceae	Arecoideae	1	0	black
Cyrtostachys elegans	Cyrtostachys	elegans	Areceae	Arecoideae	1	0	green, black
Cyrtostachys glauca	Cyrtostachys	glauca	Areceae	Arecoideae	1	0	purple, black
Cyrtostachys loriae	Cyrtostachys	loriae	Areceae	Arecoideae	1	0	green, black
Cyrtostachys renda	Cyrtostachys	renda	Areceae	Arecoideae	1	0	black
Daemonorops acamptostachys	Daemonorops	acamptostachys	Calameae	Calamoideae	1	0	brown
Daemonorops acehensis	Daemonorops	acehensis	Calameae	Calamoideae	1	0	brown
Daemonorops angustifolia	Daemonorops	angustifolia	Calameae	Calamoideae	1	0	brown
Daemonorops asteracantha	Daemonorops	asteracantha	Calameae	Calamoideae	1	0	brown
Daemonorops atra	Daemonorops	atra	Calameae	Calamoideae	1	0	brown
Daemonorops aurea	Daemonorops	aurea	Calameae	Calamoideae	0	1	yellow
Daemonorops beguinii	Daemonorops	beguinii	Calameae	Calamoideae	0	1	yellow
Daemonorops brachystachys	Daemonorops	brachystachys	Calameae	Calamoideae	1	0	brown
Daemonorops calicarpa	Daemonorops	calicarpa	Calameae	Calamoideae	1	0	brown
Daemonorops collarifera	Daemonorops	collarifera	Calameae	Calamoideae	1	0	brown
Daemonorops crinita	Daemonorops	crinita	Calameae	Calamoideae	0	1	red
Daemonorops cristata	Daemonorops	cristata	Calameae	Calamoideae	1	0	brown
Daemonorops curranii	Daemonorops	curranii	Calameae	Calamoideae	1	0	green, brown
Daemonorops depressiuscula	Daemonorops	depressiuscula	Calameae	Calamoideae	0	1	orange
Daemonorops didymophylla	Daemonorops	didymophylla	Calameae	Calamoideae	1	0	brown
Daemonorops draco	Daemonorops	draco	Calameae	Calamoideae	0	1	red
Daemonorops dransfieldii	Daemonorops	dransfieldii	Calameae	Calamoideae	1	0	brown
Daemonorops elongata	Daemonorops	elongata	Calameae	Calamoideae	1	0	straw-coloured
Daemonorops fissa	Daemonorops	fissa	Calameae	Calamoideae	1	0	brown
Daemonorops formicaria	Daemonorops	formicaria	Calameae	Calamoideae	1	0	brown
Daemonorops geniculata	Daemonorops	geniculata	Calameae	Calamoideae	1	0	brown
Daemonorops gracilipes	Daemonorops	gracilipes	Calameae	Calamoideae	1	0	green
Daemonorops grandis	Daemonorops	grandis	Calameae	Calamoideae	1	0	brown
Daemonorops hirsuta	Daemonorops	hirsuta	Calameae	Calamoideae	1	0	brown, straw-coloured
Daemonorops ingens	Daemonorops	ingens	Calameae	Calamoideae	1	0	brown
Daemonorops jenkinsiana	Daemonorops	jenkinsiana	Calameae	Calamoideae	1	0	brown
Daemonorops korthalsii	Daemonorops	korthalsii	Calameae	Calamoideae	1	0	brown
Daemonorops kunstleri	Daemonorops	kunstleri	Calameae	Calamoideae	1	0	brown
Daemonorops kurziana	Daemonorops	kurziana	Calameae	Calamoideae	1	0	brown, straw-coloured
Daemonorops leptopus	Daemonorops	leptopus	Calameae	Calamoideae	1	0	brown
Daemonorops lewisiana	Daemonorops	lewisiana	Calameae	Calamoideae	1	0	brown
Daemonorops longipes	Daemonorops	longipes	Calameae	Calamoideae	1	0	straw-coloured, brown
Daemonorops longispatha	Daemonorops	longispatha	Calameae	Calamoideae	1	0	brown
Daemonorops longistipes	Daemonorops	longistipes	Calameae	Calamoideae	1	0	straw-coloured
Daemonorops macrophylla	Daemonorops	macrophylla	Calameae	Calamoideae	1	0	brown
Daemonorops macroptera	Daemonorops	macroptera	Calameae	Calamoideae	0	1	yellow
Daemonorops maculata	Daemonorops	maculata	Calameae	Calamoideae	1	0	brown
Daemonorops manii	Daemonorops	manii	Calameae	Calamoideae	1	0	brown
Daemonorops melanochaetes	Daemonorops	melanochaetes	Calameae	Calamoideae	1	0	brown
Daemonorops microstachys	Daemonorops	microstachys	Calameae	Calamoideae	1	0	green, straw-coloured
Daemonorops mogeana	Daemonorops	mogeana	Calameae	Calamoideae	1	0	white
Daemonorops mollis	Daemonorops	mollis	Calameae	Calamoideae	0	1	pink
Daemonorops mollispina	Daemonorops	mollispina	Calameae	Calamoideae	1	0	brown
Daemonorops monticola	Daemonorops	monticola	Calameae	Calamoideae	1	0	brown
Daemonorops nuichuaensis	Daemonorops	nuichuaensis	Calameae	Calamoideae	1	0	brown
Daemonorops oblata	Daemonorops	oblata	Calameae	Calamoideae	1	0	green, ivory
Daemonorops oblonga	Daemonorops	oblonga	Calameae	Calamoideae	1	0	brown
Daemonorops oxycarpa	Daemonorops	oxycarpa	Calameae	Calamoideae	1	0	brown
Daemonorops periacantha	Daemonorops	periacantha	Calameae	Calamoideae	1	0	straw-coloured, brown
Daemonorops poilanei	Daemonorops	poilanei	Calameae	Calamoideae	1	0	brown
Daemonorops rarispinosa	Daemonorops	rarispinosa	Calameae	Calamoideae	0	1	yellow
Daemonorops robusta	Daemonorops	robusta	Calameae	Calamoideae	1	0	green
Daemonorops rubra	Daemonorops	rubra	Calameae	Calamoideae	0	1	red
Daemonorops ruptilis	Daemonorops	ruptilis	Calameae	Calamoideae	1	0	brown
Daemonorops sabut	Daemonorops	sabut	Calameae	Calamoideae	1	0	brown
Daemonorops sarasinorum	Daemonorops	sarasinorum	Calameae	Calamoideae	1	0	straw-coloured
Daemonorops scapigera	Daemonorops	scapigera	Calameae	Calamoideae	1	0	straw-coloured
Daemonorops sekundurensis	Daemonorops	sekundurensis	Calameae	Calamoideae	1	0	brown
Daemonorops sepal	Daemonorops	sepal	Calameae	Calamoideae	1	0	brown
Daemonorops serpentina	Daemonorops	serpentina	Calameae	Calamoideae	1	0	brown
Daemonorops siberutensis	Daemonorops	siberutensis	Calameae	Calamoideae	1	0	brown
Daemonorops singalana	Daemonorops	singalana	Calameae	Calamoideae	1	0	green
Daemonorops sparsiflora	Daemonorops	sparsiflora	Calameae	Calamoideae	1	0	brown
Daemonorops spectabilis	Daemonorops	spectabilis	Calameae	Calamoideae	1	0	brown
Daemonorops unijuga	Daemonorops	unijuga	Calameae	Calamoideae	1	0	brown
Daemonorops verticillaris	Daemonorops	verticillaris	Calameae	Calamoideae	1	0	brown
Daemonorops wrightmyoensis	Daemonorops	wrightmyoensis	Calameae	Calamoideae	1	0	brown
Deckenia nobilis	Deckenia	nobilis	Areceae	Arecoideae	1	0	black
Desmoncus cirrhifer	Desmoncus	cirrhifer	Cocoseae	Arecoideae	0	1	red
Desmoncus giganteus	Desmoncus	giganteus	Cocoseae	Arecoideae	0	1	red
Desmoncus mitis	Desmoncus	mitis	Cocoseae	Arecoideae	0	1	red, green
Desmoncus orthacanthos	Desmoncus	orthacanthos	Cocoseae	Arecoideae	0	1	orange, yellow, red
Desmoncus osensis	Desmoncus	osensis	Cocoseae	Arecoideae	0	1	red
Desmoncus polyacanthos	Desmoncus	polyacanthos	Cocoseae	Arecoideae	0	1	orange, red
Desmoncus stans	Desmoncus	stans	Cocoseae	Arecoideae	0	1	orange
Dictyocaryum fuscum	Dictyocaryum	fuscum	Irarteeae	Arecoideae	0	1	yellow
Dictyocaryum lamarckianum	Dictyocaryum	lamarckianum	Irarteeae	Arecoideae	0	1	yellow
Dictyocaryum ptarianum	Dictyocaryum	ptarianum	Irarteeae	Arecoideae	0	1	yellow, brown
Dictyosperma album	Dictyosperma	album	Areceae	Arecoideae	1	0	purple, black
Dransfieldia micrantha	Dransfieldia	micrantha	Areceae	Arecoideae	1	0	black
Drymophloeus litigiosus	Drymophloeus	litigiosus	Areceae	Arecoideae	0	1	yellow, red
Drymophloeus oliviformis	Drymophloeus	oliviformis	Areceae	Arecoideae	0	1	red
Drymophloeus whitmeeanus	Drymophloeus	whitmeeanus	Areceae	Arecoideae	0	1	red
Dypsis acaulis	Dypsis	acaulis	Areceae	Arecoideae	0	1	red
Dypsis acuminum	Dypsis	acuminum	Areceae	Arecoideae	0	1	orange
Dypsis ambilaensis	Dypsis	ambilaensis	Areceae	Arecoideae	0	1	red
Dypsis andapae	Dypsis	andapae	Areceae	Arecoideae	0	1	orange
Dypsis andilamenensis	Dypsis	andilamenensis	Areceae	Arecoideae	0	1	yellow
Dypsis andrianatonga	Dypsis	andrianatonga	Areceae	Arecoideae	1	0	green
Dypsis anjae	Dypsis	anjae	Areceae	Arecoideae	0	1	red
Dypsis baronii	Dypsis	baronii	Areceae	Arecoideae	0	1	yellow
Dypsis beentjei	Dypsis	beentjei	Areceae	Arecoideae	0	1	red
Dypsis bejofo	Dypsis	bejofo	Areceae	Arecoideae	1	0	green
Dypsis bernieriana	Dypsis	bernieriana	Areceae	Arecoideae	0	1	red
Dypsis betsimisarakae	Dypsis	betsimisarakae	Areceae	Arecoideae	0	1	red
Dypsis cabadae	Dypsis	cabadae	Areceae	Arecoideae	0	1	red
Dypsis carlsmithii	Dypsis	carlsmithii	Areceae	Arecoideae	1	0	black
Dypsis catatiana	Dypsis	catatiana	Areceae	Arecoideae	0	1	red
Dypsis caudata	Dypsis	caudata	Areceae	Arecoideae	0	1	orange
Dypsis ceracea	Dypsis	ceracea	Areceae	Arecoideae	1	0	green
Dypsis concinna	Dypsis	concinna	Areceae	Arecoideae	0	1	red
Dypsis confusa	Dypsis	confusa	Areceae	Arecoideae	0	1	orange, red
Dypsis coriacea	Dypsis	coriacea	Areceae	Arecoideae	0	1	red
Dypsis corniculata	Dypsis	corniculata	Areceae	Arecoideae	0	1	red
Dypsis coursii	Dypsis	coursii	Areceae	Arecoideae	1	0	green, brown
Dypsis crinita	Dypsis	crinita	Areceae	Arecoideae	1	0	green, purple, black
Dypsis decaryi	Dypsis	decaryi	Areceae	Arecoideae	1	0	green
Dypsis digitata	Dypsis	digitata	Areceae	Arecoideae	0	1	red
Dypsis eriostachys	Dypsis	eriostachys	Areceae	Arecoideae	0	1	red, green
Dypsis fibrosa	Dypsis	fibrosa	Areceae	Arecoideae	1	0	green, black
Dypsis forficifolia	Dypsis	forficifolia	Areceae	Arecoideae	0	1	red, black
Dypsis glabrescens	Dypsis	glabrescens	Areceae	Arecoideae	0	1	red
Dypsis henrici	Dypsis	henrici	Areceae	Arecoideae	0	1	green, red
Dypsis heterophylla	Dypsis	heterophylla	Areceae	Arecoideae	0	1	yellow, orange, red
Dypsis hiarakae	Dypsis	hiarakae	Areceae	Arecoideae	0	1	red
Dypsis hildebrandtii	Dypsis	hildebrandtii	Areceae	Arecoideae	0	1	red
Dypsis hovomantsina	Dypsis	hovomantsina	Areceae	Arecoideae	1	0	green
Dypsis humbertii	Dypsis	humbertii	Areceae	Arecoideae	0	1	green, red
Dypsis jeremiei	Dypsis	jeremiei	Areceae	Arecoideae	0	1	yellow, red
Dypsis jumelleana	Dypsis	jumelleana	Areceae	Arecoideae	0	1	red
Dypsis lantzeana	Dypsis	lantzeana	Areceae	Arecoideae	1	0	purple
Dypsis leptocheilos	Dypsis	leptocheilos	Areceae	Arecoideae	1	0	brown
Dypsis ligulata	Dypsis	ligulata	Areceae	Arecoideae	0	1	yellow
Dypsis linearis	Dypsis	linearis	Areceae	Arecoideae	0	1	yellow, red
Dypsis louvelii	Dypsis	louvelii	Areceae	Arecoideae	0	1	red
Dypsis lutescens	Dypsis	lutescens	Areceae	Arecoideae	0	1	yellow
Dypsis madagascariensis	Dypsis	madagascariensis	Areceae	Arecoideae	1	0	green
Dypsis makirae	Dypsis	makirae	Areceae	Arecoideae	0	1	yellow
Dypsis malcomberi	Dypsis	malcomberi	Areceae	Arecoideae	0	1	orange
Dypsis mananjarensis	Dypsis	mananjarensis	Areceae	Arecoideae	0	1	yellow
Dypsis marojejyi	Dypsis	marojejyi	Areceae	Arecoideae	1	0	green
Dypsis mcdonaldiana	Dypsis	mcdonaldiana	Areceae	Arecoideae	0	1	red
Dypsis minuta	Dypsis	minuta	Areceae	Arecoideae	0	1	red
Dypsis mirabilis	Dypsis	mirabilis	Areceae	Arecoideae	1	0	green
Dypsis mocquerysiana	Dypsis	mocquerysiana	Areceae	Arecoideae	0	1	red
Dypsis nodifera	Dypsis	nodifera	Areceae	Arecoideae	1	0	green
Dypsis occidentalis	Dypsis	occidentalis	Areceae	Arecoideae	0	1	orange
Dypsis onilahensis	Dypsis	onilahensis	Areceae	Arecoideae	0	1	yellow
Dypsis oreophila	Dypsis	oreophila	Areceae	Arecoideae	0	1	green, red
Dypsis ovobontsira	Dypsis	ovobontsira	Areceae	Arecoideae	1	0	green
Dypsis pachyramea	Dypsis	pachyramea	Areceae	Arecoideae	0	1	red
Dypsis pembana	Dypsis	pembana	Areceae	Arecoideae	0	1	red
Dypsis perrieri	Dypsis	perrieri	Areceae	Arecoideae	1	0	brown
Dypsis pinnatifrons	Dypsis	pinnatifrons	Areceae	Arecoideae	1	0	green
Dypsis prestoniana	Dypsis	prestoniana	Areceae	Arecoideae	0	1	orange
Dypsis procumbens	Dypsis	procumbens	Areceae	Arecoideae	0	1	yellow, red
Dypsis pusilla	Dypsis	pusilla	Areceae	Arecoideae	1	0	purple, black
Dypsis ramentacea	Dypsis	ramentacea	Areceae	Arecoideae	0	1	red
Dypsis robusta	Dypsis	robusta	Areceae	Arecoideae	0	1	orange
Dypsis schatzii	Dypsis	schatzii	Areceae	Arecoideae	0	1	red
Dypsis scottiana	Dypsis	scottiana	Areceae	Arecoideae	0	1	red
Dypsis serpentina	Dypsis	serpentina	Areceae	Arecoideae	1	0	purple
Dypsis simianensis	Dypsis	simianensis	Areceae	Arecoideae	0	1	red
Dypsis spicata	Dypsis	spicata	Areceae	Arecoideae	0	1	red
Dypsis tenuissima	Dypsis	tenuissima	Areceae	Arecoideae	1	0	green, white
Dypsis thermarum	Dypsis	thermarum	Areceae	Arecoideae	0	1	orange
Dypsis thiryana	Dypsis	thiryana	Areceae	Arecoideae	0	1	red
Dypsis trapezoidea	Dypsis	trapezoidea	Areceae	Arecoideae	0	1	red
Dypsis tsaratananensis	Dypsis	tsaratananensis	Areceae	Arecoideae	0	1	yellow
Dypsis turkii	Dypsis	turkii	Areceae	Arecoideae	0	1	red
Dypsis utilis	Dypsis	utilis	Areceae	Arecoideae	1	0	green, brown, black
Dypsis viridis	Dypsis	viridis	Areceae	Arecoideae	0	1	red
Dypsis vonitrandambo	Dypsis	vonitrandambo	Areceae	Arecoideae	1	0	black
Elaeis guineensis	Elaeis	guineensis	Cocoseae	Arecoideae	0	1	orange, red, black
Elaeis oleifera	Elaeis	oleifera	Cocoseae	Arecoideae	0	1	orange, yellow, red
Eleiodoxa conferta	Eleiodoxa	conferta	Calameae	Calamoideae	1	0	brown
Eremospatha barendii	Eremospatha	barendii	Lepidocaryeae	Calamoideae	0	1	red, brown
Eremospatha cabrae	Eremospatha	cabrae	Lepidocaryeae	Calamoideae	0	1	red, brown
Eremospatha cuspidata	Eremospatha	cuspidata	Lepidocaryeae	Calamoideae	0	1	red, brown
Eremospatha dransfieldii	Eremospatha	dransfieldii	Lepidocaryeae	Calamoideae	0	1	red, brown
Eremospatha haullevilleana	Eremospatha	haullevilleana	Lepidocaryeae	Calamoideae	0	1	red, brown
Eremospatha hookeri	Eremospatha	hookeri	Lepidocaryeae	Calamoideae	0	1	red, brown
Eremospatha laurentii	Eremospatha	laurentii	Lepidocaryeae	Calamoideae	0	1	red, brown
Eremospatha macrocarpa	Eremospatha	macrocarpa	Lepidocaryeae	Calamoideae	0	1	red, brown
Eremospatha quinquecostulata	Eremospatha	quinquecostulata	Lepidocaryeae	Calamoideae	0	1	red, brown
Eremospatha tessmanniana	Eremospatha	tessmanniana	Lepidocaryeae	Calamoideae	0	1	red, brown
Eremospatha wendlandiana	Eremospatha	wendlandiana	Lepidocaryeae	Calamoideae	1	0	brown
Eugeissona brachystachys	Eugeissona	brachystachys	Eugeissoneae	Calamoideae	1	0	brown
Eugeissona insignis	Eugeissona	insignis	Eugeissoneae	Calamoideae	1	0	brown
Eugeissona minor	Eugeissona	minor	Eugeissoneae	Calamoideae	1	0	brown
Eugeissona tristis	Eugeissona	tristis	Eugeissoneae	Calamoideae	1	0	brown
Eugeissona utilis	Eugeissona	utilis	Eugeissoneae	Calamoideae	1	0	green, brown
Euterpe broadwayi	Euterpe	broadwayi	Euterpeae	Arecoideae	1	0	purple, black
Euterpe catinga	Euterpe	catinga	Euterpeae	Arecoideae	1	0	purple, black
Euterpe edulis	Euterpe	edulis	Euterpeae	Arecoideae	1	0	purple, black
Euterpe longibracteata	Euterpe	longibracteata	Euterpeae	Arecoideae	1	0	purple, black
Euterpe luminosa	Euterpe	luminosa	Euterpeae	Arecoideae	1	0	black
Euterpe oleracea	Euterpe	oleracea	Euterpeae	Arecoideae	1	0	purple, black
Euterpe precatoria	Euterpe	precatoria	Euterpeae	Arecoideae	1	0	purple, black
Gaussia attenuata	Gaussia	attenuata	Chamaedoreeae	Arecoideae	0	1	orange, red
Gaussia gomez-pompae	Gaussia	gomez-pompae	Chamaedoreeae	Arecoideae	0	1	orange, red
Gaussia maya	Gaussia	maya	Chamaedoreeae	Arecoideae	0	1	red
Gaussia princeps	Gaussia	princeps	Chamaedoreeae	Arecoideae	0	1	orange, red
Gaussia spirituana	Gaussia	spirituana	Chamaedoreeae	Arecoideae	0	1	orange, red
Geonoma aspidiifolia	Geonoma	aspidiifolia	Geonomateae	Arecoideae	1	0	black
Geonoma baculifera	Geonoma	baculifera	Geonomateae	Arecoideae	1	0	black
Geonoma brongniartii	Geonoma	brongniartii	Geonomateae	Arecoideae	1	0	black
Geonoma camana	Geonoma	camana	Geonomateae	Arecoideae	1	0	green, black
Geonoma chococola	Geonoma	chococola	Geonomateae	Arecoideae	1	0	black
Geonoma concinna	Geonoma	concinna	Geonomateae	Arecoideae	1	0	black
Geonoma congesta	Geonoma	congesta	Geonomateae	Arecoideae	1	0	black
Geonoma cuneata	Geonoma	cuneata	Geonomateae	Arecoideae	1	0	black
Geonoma deversa	Geonoma	deversa	Geonomateae	Arecoideae	1	0	black
Geonoma divisa	Geonoma	divisa	Geonomateae	Arecoideae	1	0	black
Geonoma epetiolata	Geonoma	epetiolata	Geonomateae	Arecoideae	1	0	black
Geonoma euspatha	Geonoma	euspatha	Geonomateae	Arecoideae	0	1	red, black
Geonoma ferruginea	Geonoma	ferruginea	Geonomateae	Arecoideae	1	0	black
Geonoma interrupta	Geonoma	interrupta	Geonomateae	Arecoideae	1	0	black
Geonoma lanata	Geonoma	lanata	Geonomateae	Arecoideae	1	0	black
Geonoma laxiflora	Geonoma	laxiflora	Geonomateae	Arecoideae	1	0	black
Geonoma lehmannii	Geonoma	lehmannii	Geonomateae	Arecoideae	1	0	black
Geonoma leptospadix	Geonoma	leptospadix	Geonomateae	Arecoideae	1	0	purple, black
Geonoma longipedunculata	Geonoma	longipedunculata	Geonomateae	Arecoideae	1	0	black
Geonoma longivaginata	Geonoma	longivaginata	Geonomateae	Arecoideae	1	0	black
Geonoma macrostachys	Geonoma	macrostachys	Geonomateae	Arecoideae	1	0	black
Geonoma maxima	Geonoma	maxima	Geonomateae	Arecoideae	0	1	green, yellow, black
Geonoma monospatha	Geonoma	monospatha	Geonomateae	Arecoideae	1	0	black
Geonoma occidentalis	Geonoma	occidentalis	Geonomateae	Arecoideae	1	0	black
Geonoma oligoclona	Geonoma	oligoclona	Geonomateae	Arecoideae	1	0	black
Geonoma orbignyana	Geonoma	orbignyana	Geonomateae	Arecoideae	1	0	black
Geonoma paradoxa	Geonoma	paradoxa	Geonomateae	Arecoideae	1	0	black
Geonoma pauciflora	Geonoma	pauciflora	Geonomateae	Arecoideae	1	0	black
Geonoma pinnatifrons	Geonoma	pinnatifrons	Geonomateae	Arecoideae	1	0	black
Geonoma poeppigiana	Geonoma	poeppigiana	Geonomateae	Arecoideae	1	0	brown, black
Geonoma pohliana	Geonoma	pohliana	Geonomateae	Arecoideae	1	0	black
Geonoma poiteauana	Geonoma	poiteauana	Geonomateae	Arecoideae	1	0	black, purple
Geonoma santanderensis	Geonoma	santanderensis	Geonomateae	Arecoideae	1	0	black
Geonoma schottiana	Geonoma	schottiana	Geonomateae	Arecoideae	1	0	black
Geonoma stricta	Geonoma	stricta	Geonomateae	Arecoideae	1	0	black
Geonoma talamancana	Geonoma	talamancana	Geonomateae	Arecoideae	1	0	black
Geonoma tenuissima	Geonoma	tenuissima	Geonomateae	Arecoideae	1	0	green, blue
Geonoma triandra	Geonoma	triandra	Geonomateae	Arecoideae	1	0	black, blue
Geonoma triglochin	Geonoma	triglochin	Geonomateae	Arecoideae	1	0	purple, black
Geonoma undata	Geonoma	undata	Geonomateae	Arecoideae	1	0	black
Guihaia argyrata	Guihaia	argyrata	Trachycarpeae	Coryphoideae	1	0	blue, black
Guihaia grossifibrosa	Guihaia	grossifibrosa	Trachycarpeae	Coryphoideae	1	0	blue, black
Hedyscepe canterburyana	Hedyscepe	canterburyana	Areceae	Arecoideae	0	1	red
Hemithrinax compacta	Hemithrinax	compacta	Cryosophileae	Coryphoideae	1	0	white
Hemithrinax ekmaniana	Hemithrinax	ekmaniana	Cryosophileae	Coryphoideae	0	1	yellow
Hemithrinax rivularis	Hemithrinax	rivularis	Cryosophileae	Coryphoideae	1	0	white
Heterospathe annectens	Heterospathe	annectens	Areceae	Arecoideae	0	1	red
Heterospathe barfodii	Heterospathe	barfodii	Areceae	Arecoideae	0	1	red
Heterospathe brevicaulis	Heterospathe	brevicaulis	Areceae	Arecoideae	0	1	yellow, red
Heterospathe cagayanensis	Heterospathe	cagayanensis	Areceae	Arecoideae	0	1	white, orange, red
Heterospathe califrons	Heterospathe	califrons	Areceae	Arecoideae	0	1	yellow, red
Heterospathe delicatula	Heterospathe	delicatula	Areceae	Arecoideae	0	1	pink
Heterospathe elata	Heterospathe	elata	Areceae	Arecoideae	0	1	red
Heterospathe elegans	Heterospathe	elegans	Areceae	Arecoideae	0	1	red, orange
Heterospathe intermedia	Heterospathe	intermedia	Areceae	Arecoideae	0	1	red
Heterospathe lepidota	Heterospathe	lepidota	Areceae	Arecoideae	0	1	red
Heterospathe macgregorii	Heterospathe	macgregorii	Areceae	Arecoideae	0	1	red
Heterospathe minor	Heterospathe	minor	Areceae	Arecoideae	0	1	orange, red
Heterospathe negrosensis	Heterospathe	negrosensis	Areceae	Arecoideae	0	1	green, yellow, red
Heterospathe parviflora	Heterospathe	parviflora	Areceae	Arecoideae	0	1	red
Heterospathe philippinensis	Heterospathe	philippinensis	Areceae	Arecoideae	0	1	yellow, red
Heterospathe phillipsii	Heterospathe	phillipsii	Areceae	Arecoideae	0	1	red
Heterospathe porcata	Heterospathe	porcata	Areceae	Arecoideae	0	1	red
Heterospathe pulchra	Heterospathe	pulchra	Areceae	Arecoideae	0	1	red
Heterospathe scitula	Heterospathe	scitula	Areceae	Arecoideae	0	1	red
Heterospathe sibuyanensis	Heterospathe	sibuyanensis	Areceae	Arecoideae	0	1	red
Heterospathe trispatha	Heterospathe	trispatha	Areceae	Arecoideae	0	1	yellow, red
Heterospathe uniformis	Heterospathe	uniformis	Areceae	Arecoideae	0	1	green, orange, red
Howea belmoreana	Howea	belmoreana	Areceae	Arecoideae	0	1	red
Howea forsteriana	Howea	forsteriana	Areceae	Arecoideae	0	1	red
Hydriastele aprica	Hydriastele	aprica	Areceae	Arecoideae	1	0	black
Hydriastele beccariana	Hydriastele	beccariana	Areceae	Arecoideae	0	1	red
Hydriastele beguinii	Hydriastele	beguinii	Areceae	Arecoideae	0	1	red
Hydriastele biakensis	Hydriastele	biakensis	Areceae	Arecoideae	0	1	red
Hydriastele boumae	Hydriastele	boumae	Areceae	Arecoideae	1	0	white
Hydriastele brassii	Hydriastele	brassii	Areceae	Arecoideae	0	1	red
Hydriastele chaunostachys	Hydriastele	chaunostachys	Areceae	Arecoideae	0	1	red
Hydriastele costata	Hydriastele	costata	Areceae	Arecoideae	1	0	blue, grey, brown, black
Hydriastele cylindrocarpa	Hydriastele	cylindrocarpa	Areceae	Arecoideae	0	1	yellow
Hydriastele dransfieldii	Hydriastele	dransfieldii	Areceae	Arecoideae	0	1	yellow, red
Hydriastele flabellata	Hydriastele	flabellata	Areceae	Arecoideae	0	1	red
Hydriastele gibbsiana	Hydriastele	gibbsiana	Areceae	Arecoideae	0	1	red
Hydriastele hombronii	Hydriastele	hombronii	Areceae	Arecoideae	0	1	red
Hydriastele kasesa	Hydriastele	kasesa	Areceae	Arecoideae	0	1	red
Hydriastele longispatha	Hydriastele	longispatha	Areceae	Arecoideae	0	1	red
Hydriastele macrospadix	Hydriastele	macrospadix	Areceae	Arecoideae	0	1	red
Hydriastele microcarpa	Hydriastele	microcarpa	Areceae	Arecoideae	1	0	white
Hydriastele microspadix	Hydriastele	microspadix	Areceae	Arecoideae	0	1	red
Hydriastele pinangoides	Hydriastele	pinangoides	Areceae	Arecoideae	0	1	pink, red
Hydriastele pleurocarpa	Hydriastele	pleurocarpa	Areceae	Arecoideae	0	1	yellow, orange, red
Hydriastele ramsayi	Hydriastele	ramsayi	Areceae	Arecoideae	0	1	red
Hydriastele rheophytica	Hydriastele	rheophytica	Areceae	Arecoideae	0	1	red
Hydriastele valida	Hydriastele	valida	Areceae	Arecoideae	0	1	red, purple
Hydriastele wendlandiana	Hydriastele	wendlandiana	Areceae	Arecoideae	0	1	red
Hyophorbe amaricaulis	Hyophorbe	amaricaulis	Chamaedoreeae	Arecoideae	1	0	brown
Hyophorbe indica	Hyophorbe	indica	Chamaedoreeae	Arecoideae	0	1	green, yellow, red
Hyophorbe lagenicaulis	Hyophorbe	lagenicaulis	Chamaedoreeae	Arecoideae	1	0	green, black
Hyophorbe vaughanii	Hyophorbe	vaughanii	Chamaedoreeae	Arecoideae	1	0	brown
Hyospathe elegans	Hyospathe	elegans	Euterpeae	Arecoideae	1	0	black
Hyospathe macrorhachis	Hyospathe	macrorhachis	Euterpeae	Arecoideae	1	0	black
Hyphaene compressa	Hyphaene	compressa	Borasseae	Coryphoideae	1	0	brown
Hyphaene coriacea	Hyphaene	coriacea	Borasseae	Coryphoideae	1	0	brown
Hyphaene dichotoma	Hyphaene	dichotoma	Borasseae	Coryphoideae	1	0	brown
Hyphaene guineensis	Hyphaene	guineensis	Borasseae	Coryphoideae	0	1	orange, brown
Hyphaene petersiana	Hyphaene	petersiana	Borasseae	Coryphoideae	1	0	brown
Hyphaene reptans	Hyphaene	reptans	Borasseae	Coryphoideae	0	1	red
Hyphaene thebaica	Hyphaene	thebaica	Borasseae	Coryphoideae	1	0	brown
Iguanura ambigua	Iguanura	ambigua	Areceae	Arecoideae	0	1	white, red, orange, black, brown
Iguanura asli	Iguanura	asli	Areceae	Arecoideae	0	1	pink
Iguanura belumensis	Iguanura	belumensis	Areceae	Arecoideae	0	1	white, pink, red
Iguanura bicornis	Iguanura	bicornis	Areceae	Arecoideae	0	1	red
Iguanura borneensis	Iguanura	borneensis	Areceae	Arecoideae	0	1	red
Iguanura curvata	Iguanura	curvata	Areceae	Arecoideae	0	1	green, white, red
Iguanura divergens	Iguanura	divergens	Areceae	Arecoideae	0	1	green, red
Iguanura elegans	Iguanura	elegans	Areceae	Arecoideae	0	1	red
Iguanura geonomiformis	Iguanura	geonomiformis	Areceae	Arecoideae	0	1	white, red
Iguanura kelantanensis	Iguanura	kelantanensis	Areceae	Arecoideae	0	1	white, red
Iguanura macrostachya	Iguanura	macrostachya	Areceae	Arecoideae	0	1	pink, red
Iguanura melinauensis	Iguanura	melinauensis	Areceae	Arecoideae	0	1	white, red
Iguanura mirabilis	Iguanura	mirabilis	Areceae	Arecoideae	0	1	red
Iguanura myochodoides	Iguanura	myochodoides	Areceae	Arecoideae	0	1	white, red
Iguanura palmuncula	Iguanura	palmuncula	Areceae	Arecoideae	0	1	white, red
Iguanura perdana	Iguanura	perdana	Areceae	Arecoideae	0	1	yellow, pink
Iguanura piahensis	Iguanura	piahensis	Areceae	Arecoideae	0	1	red
Iguanura polymorpha	Iguanura	polymorpha	Areceae	Arecoideae	0	1	red
Iguanura prolifera	Iguanura	prolifera	Areceae	Arecoideae	0	1	red
Iguanura sanderiana	Iguanura	sanderiana	Areceae	Arecoideae	0	1	red
Iguanura tenuis	Iguanura	tenuis	Areceae	Arecoideae	1	0	white
Iguanura thalangensis	Iguanura	thalangensis	Areceae	Arecoideae	0	1	pink
Iguanura wallichiana	Iguanura	wallichiana	Areceae	Arecoideae	0	1	pink, red
Iriartea deltoidea	Iriartea	deltoidea	Irarteeae	Arecoideae	0	1	yellow, black
Iriartella setigera	Iriartella	setigera	Irarteeae	Arecoideae	0	1	red, orange, brown
Iriartella stenocarpa	Iriartella	stenocarpa	Irarteeae	Arecoideae	0	1	orange
Itaya amicorum	Itaya	amicorum	Cryosophileae	Coryphoideae	1	0	green
Johannesteijsmannia altifrons	Johannesteijsmannia	altifrons	Trachycarpeae	Coryphoideae	1	0	brown
Johannesteijsmannia lanceolata	Johannesteijsmannia	lanceolata	Trachycarpeae	Coryphoideae	1	0	brown
Johannesteijsmannia magnifica	Johannesteijsmannia	magnifica	Trachycarpeae	Coryphoideae	1	0	brown
Johannesteijsmannia perakensis	Johannesteijsmannia	perakensis	Trachycarpeae	Coryphoideae	1	0	brown
Juania australis	Juania	australis	Ceroxyleae	Ceroxyloideae	0	1	orange, red
Jubaea chilensis	Jubaea	chilensis	Cocoseae	Arecoideae	1	0	brown
Jubaeopsis caffra	Jubaeopsis	caffra	Cocoseae	Arecoideae	0	1	orange
Kentiopsis magnifica	Kentiopsis	magnifica	Areceae	Arecoideae	0	1	red
Kentiopsis oliviformis	Kentiopsis	oliviformis	Areceae	Arecoideae	0	1	red
Kentiopsis piersoniorum	Kentiopsis	piersoniorum	Areceae	Arecoideae	1	0	purple
Kentiopsis pyriformis	Kentiopsis	pyriformis	Areceae	Arecoideae	0	1	pink
Kerriodoxa elegans	Kerriodoxa	elegans	Chuniophoeniceae	Coryphoideae	0	1	brown, orange, yellow
Korthalsia bejaudii	Korthalsia	bejaudii	Calameae	Calamoideae	1	0	brown
Korthalsia celebica	Korthalsia	celebica	Calameae	Calamoideae	1	0	brown
Korthalsia cheb	Korthalsia	cheb	Calameae	Calamoideae	1	0	straw-coloured
Korthalsia concolor	Korthalsia	concolor	Calameae	Calamoideae	1	0	brown
Korthalsia echinometra	Korthalsia	echinometra	Calameae	Calamoideae	1	0	brown
Korthalsia ferox	Korthalsia	ferox	Calameae	Calamoideae	1	0	brown
Korthalsia flagellaris	Korthalsia	flagellaris	Calameae	Calamoideae	1	0	brown
Korthalsia furcata	Korthalsia	furcata	Calameae	Calamoideae	1	0	brown
Korthalsia furtadoana	Korthalsia	furtadoana	Calameae	Calamoideae	1	0	brown
Korthalsia hispida	Korthalsia	hispida	Calameae	Calamoideae	1	0	brown
Korthalsia jala	Korthalsia	jala	Calameae	Calamoideae	1	0	green
Korthalsia laciniosa	Korthalsia	laciniosa	Calameae	Calamoideae	1	0	brown
Korthalsia merrillii	Korthalsia	merrillii	Calameae	Calamoideae	1	0	brown
Korthalsia paucijuga	Korthalsia	paucijuga	Calameae	Calamoideae	1	0	brown
Korthalsia rigida	Korthalsia	rigida	Calameae	Calamoideae	1	0	brown
Korthalsia robusta	Korthalsia	robusta	Calameae	Calamoideae	1	0	brown
Korthalsia rogersii	Korthalsia	rogersii	Calameae	Calamoideae	0	1	yellow
Korthalsia rostrata	Korthalsia	rostrata	Calameae	Calamoideae	1	0	brown
Korthalsia scortechinii	Korthalsia	scortechinii	Calameae	Calamoideae	1	0	brown
Korthalsia zippelii	Korthalsia	zippelii	Calameae	Calamoideae	0	1	yellow
Laccospadix australasicus	Laccospadix	australasicus	Areceae	Arecoideae	0	1	red
Laccosperma acutiflorum	Laccosperma	acutiflorum	Lepidocaryeae	Calamoideae	0	1	orange, red
Laccosperma laeve	Laccosperma	laeve	Lepidocaryeae	Calamoideae	0	1	orange, grey, brown
Laccosperma opacum	Laccosperma	opacum	Lepidocaryeae	Calamoideae	0	1	red
Laccosperma robustum	Laccosperma	robustum	Lepidocaryeae	Calamoideae	0	1	red
Laccosperma secundiflorum	Laccosperma	secundiflorum	Lepidocaryeae	Calamoideae	0	1	red, brown
Lanonia calciphila	Lanonia	calciphila	Trachycarpeae	Coryphoideae	0	1	red
Lanonia centralis	Lanonia	centralis	Trachycarpeae	Coryphoideae	1	0	white
Lanonia dasyantha	Lanonia	dasyantha	Trachycarpeae	Coryphoideae	0	1	red
Lanonia gracilis	Lanonia	gracilis	Trachycarpeae	Coryphoideae	0	1	red, brown
Lanonia hainanensis	Lanonia	hainanensis	Trachycarpeae	Coryphoideae	0	1	orange, red
Latania loddigesii	Latania	loddigesii	Borasseae	Coryphoideae	1	0	brown
Latania lontaroides	Latania	lontaroides	Borasseae	Coryphoideae	1	0	green
Latania verschaffeltii	Latania	verschaffeltii	Borasseae	Coryphoideae	1	0	green
Lemurophoenix halleuxii	Lemurophoenix	halleuxii	Areceae	Arecoideae	1	0	brown
Leopoldinia piassaba	Leopoldinia	piassaba	Leopoldinieae	Arecoideae	1	0	brown
Leopoldinia pulchra	Leopoldinia	pulchra	Leopoldinieae	Arecoideae	1	0	brown, purple
Lepidocaryum tenue	Lepidocaryum	tenue	Lepidocaryeae	Calamoideae	0	1	brown, red, orange
Lepidorrhachis mooreana	Lepidorrhachis	mooreana	Areceae	Arecoideae	0	1	red
Leucothrinax morrisii	Leucothrinax	morrisii	Cryosophileae	Coryphoideae	1	0	white
Licuala acuminata	Licuala	acuminata	Trachycarpeae	Coryphoideae	0	1	red
Licuala ahlidurii	Licuala	ahlidurii	Trachycarpeae	Coryphoideae	0	1	red
Licuala bachmaensis	Licuala	bachmaensis	Trachycarpeae	Coryphoideae	0	1	red
Licuala bacularia	Licuala	bacularia	Trachycarpeae	Coryphoideae	0	1	orange
Licuala bellatula	Licuala	bellatula	Trachycarpeae	Coryphoideae	0	1	red
Licuala bidentata	Licuala	bidentata	Trachycarpeae	Coryphoideae	0	1	red
Licuala bidoupensis	Licuala	bidoupensis	Trachycarpeae	Coryphoideae	0	1	red
Licuala bintulensis	Licuala	bintulensis	Trachycarpeae	Coryphoideae	0	1	red, orange
Licuala borneensis	Licuala	borneensis	Trachycarpeae	Coryphoideae	0	1	pink
Licuala bracteata	Licuala	bracteata	Trachycarpeae	Coryphoideae	0	1	red
Licuala brevicalyx	Licuala	brevicalyx	Trachycarpeae	Coryphoideae	1	0	green
Licuala bruneiana	Licuala	bruneiana	Trachycarpeae	Coryphoideae	1	0	grey, green
Licuala cameronensis	Licuala	cameronensis	Trachycarpeae	Coryphoideae	0	1	orange
Licuala campestris	Licuala	campestris	Trachycarpeae	Coryphoideae	1	0	green
Licuala cattienensis	Licuala	cattienensis	Trachycarpeae	Coryphoideae	0	1	red
Licuala collina	Licuala	collina	Trachycarpeae	Coryphoideae	0	1	orange, red
Licuala densiflora	Licuala	densiflora	Trachycarpeae	Coryphoideae	1	0	white
Licuala distans	Licuala	distans	Trachycarpeae	Coryphoideae	0	1	pink, red
Licuala elliptica	Licuala	elliptica	Trachycarpeae	Coryphoideae	0	1	orange
Licuala ferruginea	Licuala	ferruginea	Trachycarpeae	Coryphoideae	0	1	pink
Licuala flammula	Licuala	flammula	Trachycarpeae	Coryphoideae	1	0	white
Licuala flexuosa	Licuala	flexuosa	Trachycarpeae	Coryphoideae	0	1	red
Licuala fordiana	Licuala	fordiana	Trachycarpeae	Coryphoideae	0	1	red
Licuala fractiflexa	Licuala	fractiflexa	Trachycarpeae	Coryphoideae	0	1	red
Licuala glabra	Licuala	glabra	Trachycarpeae	Coryphoideae	0	1	orange
Licuala grandiflora	Licuala	grandiflora	Trachycarpeae	Coryphoideae	0	1	red
Licuala grandis	Licuala	grandis	Trachycarpeae	Coryphoideae	0	1	green, yellow
Licuala insignis	Licuala	insignis	Trachycarpeae	Coryphoideae	0	1	red
Licuala kemamanensis	Licuala	kemamanensis	Trachycarpeae	Coryphoideae	0	1	pink
Licuala kunstleri	Licuala	kunstleri	Trachycarpeae	Coryphoideae	0	1	orange, red
Licuala lambii	Licuala	lambii	Trachycarpeae	Coryphoideae	0	1	orange
Licuala lanata	Licuala	lanata	Trachycarpeae	Coryphoideae	1	0	blue
Licuala lauterbachii	Licuala	lauterbachii	Trachycarpeae	Coryphoideae	0	1	orange
Licuala longicalycata	Licuala	longicalycata	Trachycarpeae	Coryphoideae	0	1	red
Licuala malajana	Licuala	malajana	Trachycarpeae	Coryphoideae	0	1	orange
Licuala mattanensis	Licuala	mattanensis	Trachycarpeae	Coryphoideae	0	1	orange, brown
Licuala meijeri	Licuala	meijeri	Trachycarpeae	Coryphoideae	1	0	green, white
Licuala merguensis	Licuala	merguensis	Trachycarpeae	Coryphoideae	0	1	red
Licuala modesta	Licuala	modesta	Trachycarpeae	Coryphoideae	0	1	red
Licuala montana	Licuala	montana	Trachycarpeae	Coryphoideae	0	1	orange, red
Licuala orbicularis	Licuala	orbicularis	Trachycarpeae	Coryphoideae	1	0	grey
Licuala paludosa	Licuala	paludosa	Trachycarpeae	Coryphoideae	0	1	orange, red
Licuala parviflora	Licuala	parviflora	Trachycarpeae	Coryphoideae	0	1	red, orange
Licuala peltata	Licuala	peltata	Trachycarpeae	Coryphoideae	0	1	orange, red
Licuala penduliflora	Licuala	penduliflora	Trachycarpeae	Coryphoideae	0	1	green, yellow, orange
Licuala petiolulata	Licuala	petiolulata	Trachycarpeae	Coryphoideae	0	1	orange, red
Licuala pitta	Licuala	pitta	Trachycarpeae	Coryphoideae	0	1	red
Licuala poonsakii	Licuala	poonsakii	Trachycarpeae	Coryphoideae	0	1	red
Licuala pseudovalida	Licuala	pseudovalida	Trachycarpeae	Coryphoideae	0	1	orange
Licuala pusilla	Licuala	pusilla	Trachycarpeae	Coryphoideae	0	1	red
Licuala radula	Licuala	radula	Trachycarpeae	Coryphoideae	0	1	red
Licuala ramsayi	Licuala	ramsayi	Trachycarpeae	Coryphoideae	0	1	orange, red
Licuala ridleyana	Licuala	ridleyana	Trachycarpeae	Coryphoideae	0	1	orange
Licuala robinsoniana	Licuala	robinsoniana	Trachycarpeae	Coryphoideae	0	1	red
Licuala rubiginosa	Licuala	rubiginosa	Trachycarpeae	Coryphoideae	0	1	red, brown
Licuala rumphii	Licuala	rumphii	Trachycarpeae	Coryphoideae	0	1	green, red
Licuala sallehana	Licuala	sallehana	Trachycarpeae	Coryphoideae	1	0	green, black
Licuala sarawakensis	Licuala	sarawakensis	Trachycarpeae	Coryphoideae	0	1	green, orange
Licuala scortechinii	Licuala	scortechinii	Trachycarpeae	Coryphoideae	0	1	red
Licuala spinosa	Licuala	spinosa	Trachycarpeae	Coryphoideae	0	1	red, orange
Licuala taynguyensis	Licuala	taynguyensis	Trachycarpeae	Coryphoideae	0	1	red
Licuala telifera	Licuala	telifera	Trachycarpeae	Coryphoideae	0	1	green, orange
Licuala thoana	Licuala	thoana	Trachycarpeae	Coryphoideae	0	1	pink
Licuala triphylla	Licuala	triphylla	Trachycarpeae	Coryphoideae	0	1	red, orange
Licuala valida	Licuala	valida			0	1	orange, red
Linospadix albertisianus	Linospadix	albertisianus	Areceae	Arecoideae	0	1	red
Linospadix apetiolatus	Linospadix	apetiolatus	Areceae	Arecoideae	0	1	yellow, red
Linospadix microcaryus	Linospadix	microcaryus	Areceae	Arecoideae	0	1	yellow, orange, pink, red
Linospadix minor	Linospadix	minor	Areceae	Arecoideae	0	1	yellow, orange, red
Linospadix monostachyos	Linospadix	monostachyos	Areceae	Arecoideae	0	1	red
Linospadix palmerianus	Linospadix	palmerianus	Areceae	Arecoideae	0	1	yellow, red
Livistona alfredii	Livistona	alfredii	Trachycarpeae	Coryphoideae	1	0	brown, black
Livistona australis	Livistona	australis	Trachycarpeae	Coryphoideae	1	0	brown, black
Livistona benthamii	Livistona	benthamii	Trachycarpeae	Coryphoideae	1	0	purple, black
Livistona boninensis	Livistona	boninensis	Trachycarpeae	Coryphoideae	1	0	green
Livistona carinensis	Livistona	carinensis	Trachycarpeae	Coryphoideae	1	0	brown, black
Livistona chinensis	Livistona	chinensis	Trachycarpeae	Coryphoideae	1	0	green, blue
Livistona concinna	Livistona	concinna	Trachycarpeae	Coryphoideae	1	0	black
Livistona decora	Livistona	decora	Trachycarpeae	Coryphoideae	1	0	black
Livistona drudei	Livistona	drudei	Trachycarpeae	Coryphoideae	1	0	purple, black
Livistona eastonii	Livistona	eastonii	Trachycarpeae	Coryphoideae	1	0	purple, black
Livistona endauensis	Livistona	endauensis	Trachycarpeae	Coryphoideae	1	0	green
Livistona exigua	Livistona	exigua	Trachycarpeae	Coryphoideae	1	0	green
Livistona fulva	Livistona	fulva	Trachycarpeae	Coryphoideae	1	0	black
Livistona halongensis	Livistona	halongensis	Trachycarpeae	Coryphoideae	1	0	green
Livistona humilis	Livistona	humilis	Trachycarpeae	Coryphoideae	1	0	purple, black
Livistona inermis	Livistona	inermis	Trachycarpeae	Coryphoideae	1	0	black
Livistona jenkinsiana	Livistona	jenkinsiana	Trachycarpeae	Coryphoideae	1	0	blue
Livistona lanuginosa	Livistona	lanuginosa	Trachycarpeae	Coryphoideae	1	0	purple, brown, black
Livistona lorophylla	Livistona	lorophylla	Trachycarpeae	Coryphoideae	1	0	black
Livistona mariae	Livistona	mariae	Trachycarpeae	Coryphoideae	1	0	black
Livistona muelleri	Livistona	muelleri	Trachycarpeae	Coryphoideae	1	0	blue, black
Livistona nasmophila	Livistona	nasmophila	Trachycarpeae	Coryphoideae	1	0	purple, black
Livistona nitida	Livistona	nitida	Trachycarpeae	Coryphoideae	1	0	black
Livistona rigida	Livistona	rigida	Trachycarpeae	Coryphoideae	1	0	black
Livistona saribus	Livistona	saribus	Trachycarpeae	Coryphoideae	1	0	blue, grey
Livistona speciosa	Livistona	speciosa	Trachycarpeae	Coryphoideae	1	0	blue
Livistona victoriae	Livistona	victoriae	Trachycarpeae	Coryphoideae	1	0	brown, black
Lodoicea maldivica	Lodoicea	maldivica	Borasseae	Coryphoideae	1	0	green
Loxococcus rupicola	Loxococcus	rupicola	Areceae	Arecoideae	1	0	brown
Lytocaryum hoehnei	Lytocaryum	hoehnei	Cocoseae	Arecoideae	0	1	brown, pink, red
Lytocaryum insigne	Lytocaryum	insigne	Cocoseae	Arecoideae	1	0	green
Lytocaryum itapebiense	Lytocaryum	itapebiense	Cocoseae	Arecoideae	0	1	red, orange
Lytocaryum weddellianum	Lytocaryum	weddellianum	Cocoseae	Arecoideae	1	0	brown
Manicaria saccifera	Manicaria	saccifera	Manicarieae	Arecoideae	1	0	brown
Marojejya darianii	Marojejya	darianii	Areceae	Arecoideae	0	1	green, red
Marojejya insignis	Marojejya	insignis	Areceae	Arecoideae	0	1	red, black
Masoala madagascariensis	Masoala	madagascariensis	Areceae	Arecoideae	1	0	brown
Mauritia carana	Mauritia	carana	Lepidocaryeae	Calamoideae	1	0	brown
Mauritia flexuosa	Mauritia	flexuosa	Lepidocaryeae	Calamoideae	0	1	orange, brown
Mauritiella aculeata	Mauritiella	aculeata	Lepidocaryeae	Calamoideae	1	0	brown
Mauritiella armata	Mauritiella	armata	Lepidocaryeae	Calamoideae	1	0	brown
Mauritiella macroclada	Mauritiella	macroclada	Lepidocaryeae	Calamoideae	1	0	brown
Maxburretia furtadoana	Maxburretia	furtadoana	Trachycarpeae	Coryphoideae	0	1	yellow, orange, black
Maxburretia gracilis	Maxburretia	gracilis	Trachycarpeae	Coryphoideae	1	0	brown
Medemia argun	Medemia	argun	Borasseae	Coryphoideae	1	0	purple
Metroxylon amicarum	Metroxylon	amicarum	Calameae	Calamoideae	1	0	brown
Metroxylon paulcoxii	Metroxylon	paulcoxii	Calameae	Calamoideae	1	0	green, brown
Metroxylon sagu	Metroxylon	sagu	Calameae	Calamoideae	1	0	green
Metroxylon salomonense	Metroxylon	salomonense	Calameae	Calamoideae	1	0	green
Metroxylon upoluense	Metroxylon	upoluense	Calameae	Calamoideae	1	0	brown
Metroxylon vitiense	Metroxylon	vitiense	Calameae	Calamoideae	1	0	brown
Metroxylon warburgii	Metroxylon	warburgii	Calameae	Calamoideae	1	0	brown
Myrialepis paradoxa	Myrialepis	paradoxa	Calameae	Calamoideae	1	0	green
Nannorrhops ritchieana	Nannorrhops	ritchieana	Chuniophoeniceae	Coryphoideae	0	1	brown, orange
Nenga banaensis	Nenga	banaensis	Areceae	Arecoideae	0	1	red, green
Nenga gajah	Nenga	gajah	Areceae	Arecoideae	1	0	brown
Nenga grandiflora	Nenga	grandiflora	Areceae	Arecoideae	0	1	red, black
Nenga macrocarpa	Nenga	macrocarpa	Areceae	Arecoideae	1	0	purple, black
Nenga pumila	Nenga	pumila	Areceae	Arecoideae	0	1	orange, red
Neonicholsonia watsonii	Neonicholsonia	watsonii	Euterpeae	Arecoideae	1	0	black
Neoveitchia brunnea	Neoveitchia	brunnea	Areceae	Arecoideae	0	1	red
Neoveitchia storckii	Neoveitchia	storckii	Areceae	Arecoideae	0	1	red
Nephrosperma van-houtteanum	Nephrosperma	van-houtteanum	Areceae	Arecoideae	0	1	red
Normanbya normanbyi	Normanbya	normanbyi	Areceae	Arecoideae	0	1	pink, brown
Oenocarpus bacaba	Oenocarpus	bacaba	Euterpeae	Arecoideae	1	0	purple, black
Oenocarpus balickii	Oenocarpus	balickii	Euterpeae	Arecoideae	1	0	purple, black
Oenocarpus bataua	Oenocarpus	bataua	Euterpeae	Arecoideae	1	0	purple, black
Oenocarpus circumtextus	Oenocarpus	circumtextus	Euterpeae	Arecoideae	1	0	purple, black
Oenocarpus distichus	Oenocarpus	distichus	Euterpeae	Arecoideae	1	0	purple, black
Oenocarpus makeru	Oenocarpus	makeru	Euterpeae	Arecoideae	1	0	purple, black
Oenocarpus mapora	Oenocarpus	mapora	Euterpeae	Arecoideae	1	0	purple, black
Oenocarpus minor	Oenocarpus	minor	Euterpeae	Arecoideae	1	0	purple, black
Oenocarpus simplex	Oenocarpus	simplex	Euterpeae	Arecoideae	1	0	purple, black
Oncocalamus macrospathus	Oncocalamus	macrospathus	Lepidocaryeae	Calamoideae	0	1	red
Oncocalamus mannii	Oncocalamus	mannii	Lepidocaryeae	Calamoideae	0	1	orange, red, brown
Oncocalamus tuleyi	Oncocalamus	tuleyi	Lepidocaryeae	Calamoideae	0	1	red
Oncocalamus wrightianus	Oncocalamus	wrightianus	Lepidocaryeae	Calamoideae	0	1	yellow
Oncosperma fasciculatum	Oncosperma	fasciculatum	Areceae	Arecoideae	1	0	purple, black
Oncosperma gracilipes	Oncosperma	gracilipes	Areceae	Arecoideae	1	0	black
Oncosperma horridum	Oncosperma	horridum	Areceae	Arecoideae	1	0	brown, black
Oncosperma tigillarium	Oncosperma	tigillarium	Areceae	Arecoideae	1	0	purple, black
Orania archboldiana	Orania	archboldiana	Oranieae	Arecoideae	0	1	green, red
Orania bakeri	Orania	bakeri	Oranieae	Arecoideae	1	0	brown
Orania dafonsoroensis	Orania	dafonsoroensis	Oranieae	Arecoideae	0	1	yellow, orange
Orania decipiens	Orania	decipiens	Oranieae	Arecoideae	1	0	green
Orania disticha	Orania	disticha	Oranieae	Arecoideae	0	1	orange
Orania ferruginea	Orania	ferruginea	Oranieae	Arecoideae	0	1	yellow
Orania glauca	Orania	glauca	Oranieae	Arecoideae	0	1	orange
Orania grandiflora	Orania	grandiflora	Oranieae	Arecoideae	0	1	orange
Orania lauterbachiana	Orania	lauterbachiana	Oranieae	Arecoideae	0	1	orange
Orania littoralis	Orania	littoralis	Oranieae	Arecoideae	0	1	orange, red
Orania longisquama	Orania	longisquama	Oranieae	Arecoideae	1	0	green
Orania longistaminodia	Orania	longistaminodia	Oranieae	Arecoideae	0	1	orange
Orania palindan	Orania	palindan	Oranieae	Arecoideae	0	1	green, yellow
Orania paraguanensis	Orania	paraguanensis	Oranieae	Arecoideae	1	0	green
Orania ravaka	Orania	ravaka	Oranieae	Arecoideae	0	1	yellow, brown
Orania regalis	Orania	regalis	Oranieae	Arecoideae	0	1	orange
Orania subdisticha	Orania	subdisticha	Oranieae	Arecoideae	0	1	red
Orania sylvicola	Orania	sylvicola	Oranieae	Arecoideae	0	1	brown, yellow
Orania tabubilensis	Orania	tabubilensis	Oranieae	Arecoideae	0	1	orange
Orania trispatha	Orania	trispatha	Oranieae	Arecoideae	1	0	green
Orania zonae	Orania	zonae	Oranieae	Arecoideae	0	1	red
Oraniopsis appendiculata	Oraniopsis	appendiculata	Ceroxyleae	Ceroxyloideae	0	1	yellow, orange
Parajubaea cocoides	Parajubaea	cocoides	Cocoseae	Arecoideae	1	0	brown
Parajubaea torallyi	Parajubaea	torallyi	Cocoseae	Arecoideae	1	0	brown
Pelagodoxa henryana	Pelagodoxa	henryana	Pelagodoxeae	Arecoideae	1	0	brown
Phoenicophorium borsigianum	Phoenicophorium	borsigianum	Areceae	Arecoideae	0	1	orange
Phoenix acaulis	Phoenix	acaulis	Phoeniceae	Coryphoideae	1	0	blue, black
Phoenix andamanensis	Phoenix	andamanensis	Phoeniceae	Coryphoideae	1	0	brown
Phoenix atlantica	Phoenix	atlantica	Phoeniceae	Coryphoideae	0	1	pink
Phoenix caespitosa	Phoenix	caespitosa	Phoeniceae	Coryphoideae	0	1	orange, brown
Phoenix canariensis	Phoenix	canariensis	Phoeniceae	Coryphoideae	0	1	yellow
Phoenix dactylifera	Phoenix	dactylifera	Phoeniceae	Coryphoideae	0	1	yellow, brown, black
Phoenix loureiroi	Phoenix	loureiroi	Phoeniceae	Coryphoideae	1	0	black, blue, purple
Phoenix paludosa	Phoenix	paludosa	Phoeniceae	Coryphoideae	1	0	blue, black, purple
Phoenix pusilla	Phoenix	pusilla	Phoeniceae	Coryphoideae	1	0	black
Phoenix reclinata	Phoenix	reclinata	Phoeniceae	Coryphoideae	0	1	yellow, orange, red
Phoenix roebelenii	Phoenix	roebelenii	Phoeniceae	Coryphoideae	1	0	brown
Phoenix rupicola	Phoenix	rupicola	Phoeniceae	Coryphoideae	1	0	brown
Phoenix sylvestris	Phoenix	sylvestris	Phoeniceae	Coryphoideae	0	1	orange, yellow
Phoenix theophrasti	Phoenix	theophrasti	Phoeniceae	Coryphoideae	1	0	green, brown
Pholidocarpus ihur	Pholidocarpus	ihur	Trachycarpeae	Coryphoideae	1	0	brown
Pholidocarpus macrocarpus	Pholidocarpus	macrocarpus	Trachycarpeae	Coryphoideae	1	0	brown
Pholidocarpus majadum	Pholidocarpus	majadum	Trachycarpeae	Coryphoideae	1	0	brown
Pholidocarpus sumatranus	Pholidocarpus	sumatranus	Trachycarpeae	Coryphoideae	1	0	brown
Pholidostachys dactyloides	Pholidostachys	dactyloides	Geonomateae	Arecoideae	0	1	yellow, orange
Pholidostachys kalbreyeri	Pholidostachys	kalbreyeri	Geonomateae	Arecoideae	1	0	brown
Pholidostachys occidentalis	Pholidostachys	occidentalis	Geonomateae	Arecoideae	1	0	brown
Pholidostachys panamensis	Pholidostachys	panamensis	Geonomateae	Arecoideae	1	0	brown
Pholidostachys pulchra	Pholidostachys	pulchra	Geonomateae	Arecoideae	0	1	red, black
Pholidostachys synanthera	Pholidostachys	synanthera	Geonomateae	Arecoideae	1	0	black
Physokentia dennisii	Physokentia	dennisii	Areceae	Arecoideae	0	1	orange, red
Physokentia insolita	Physokentia	insolita	Areceae	Arecoideae	0	1	red
Physokentia petiolata	Physokentia	petiolata	Areceae	Arecoideae	0	1	red
Physokentia tete	Physokentia	tete	Areceae	Arecoideae	1	0	black
Physokentia thurstonii	Physokentia	thurstonii	Areceae	Arecoideae	1	0	black
Physokentia whitmorei	Physokentia	whitmorei	Areceae	Arecoideae	1	0	green, black
Phytelephas aequatorialis	Phytelephas	aequatorialis	Phytelepheae	Ceroxyloideae	1	0	brown
Phytelephas macrocarpa	Phytelephas	macrocarpa	Phytelepheae	Ceroxyloideae	0	1	orange, brown
Phytelephas seemannii	Phytelephas	seemannii	Phytelepheae	Ceroxyloideae	1	0	brown
Phytelephas tenuicaulis	Phytelephas	tenuicaulis	Phytelepheae	Ceroxyloideae	1	0	brown
Phytelephas tumacana	Phytelephas	tumacana	Phytelepheae	Ceroxyloideae	1	0	brown
Pigafetta elata	Pigafetta	elata	Calameae	Calamoideae	1	0	brown
Pigafetta filaris	Pigafetta	filaris	Calameae	Calamoideae	0	1	yellow, orange
Pinanga acuminata	Pinanga	acuminata	Areceae	Arecoideae	0	1	red
Pinanga adangensis	Pinanga	adangensis	Areceae	Arecoideae	1	0	purple, black
Pinanga albescens	Pinanga	albescens	Areceae	Arecoideae	0	1	yellow, white, green
Pinanga angustisecta	Pinanga	angustisecta	Areceae	Arecoideae	0	1	red, brown
Pinanga annamensis	Pinanga	annamensis	Areceae	Arecoideae	0	1	pink, red
Pinanga arinasae	Pinanga	arinasae	Areceae	Arecoideae	0	1	red
Pinanga aristata	Pinanga	aristata	Areceae	Arecoideae	0	1	orange, red
Pinanga auriculata	Pinanga	auriculata	Areceae	Arecoideae	0	1	white, red, black
Pinanga badia	Pinanga	badia	Areceae	Arecoideae	0	1	red, pink
Pinanga baviensis	Pinanga	baviensis	Areceae	Arecoideae	0	1	red
Pinanga bicolana	Pinanga	bicolana	Areceae	Arecoideae	0	1	orange, black
Pinanga brevipes	Pinanga	brevipes	Areceae	Arecoideae	0	1	green, pink
Pinanga caesia	Pinanga	caesia	Areceae	Arecoideae	0	1	orange, red, black
Pinanga capitata	Pinanga	capitata	Areceae	Arecoideae	1	0	black
Pinanga cattienensis	Pinanga	cattienensis	Areceae	Arecoideae	0	1	red, pink
Pinanga celebica	Pinanga	celebica	Areceae	Arecoideae	1	0	purple
Pinanga chaiana	Pinanga	chaiana	Areceae	Arecoideae	0	1	yellow
Pinanga cleistantha	Pinanga	cleistantha	Areceae	Arecoideae	1	0	brown
Pinanga copelandii	Pinanga	copelandii	Areceae	Arecoideae	0	1	red, black
Pinanga coronata	Pinanga	coronata	Areceae	Arecoideae	0	1	yellow, pink, black
Pinanga crassipes	Pinanga	crassipes	Areceae	Arecoideae	0	1	red, black
Pinanga cucullata	Pinanga	cucullata	Areceae	Arecoideae	1	0	black
Pinanga curranii	Pinanga	curranii	Areceae	Arecoideae	0	1	red
Pinanga decora	Pinanga	decora	Areceae	Arecoideae	0	1	red
Pinanga densiflora	Pinanga	densiflora	Areceae	Arecoideae	0	1	red
Pinanga disticha	Pinanga	disticha	Areceae	Arecoideae	0	1	red
Pinanga dumetosa	Pinanga	dumetosa	Areceae	Arecoideae	0	1	red, black
Pinanga egregia	Pinanga	egregia	Areceae	Arecoideae	0	1	red, black
Pinanga fractiflexa	Pinanga	fractiflexa	Areceae	Arecoideae	0	1	yellow
Pinanga geonomiformis	Pinanga	geonomiformis	Areceae	Arecoideae	0	1	pink, black
Pinanga glaucescens	Pinanga	glaucescens	Areceae	Arecoideae	1	0	black
Pinanga glaucifolia	Pinanga	glaucifolia	Areceae	Arecoideae	0	1	yellow, red, black
Pinanga gracilis	Pinanga	gracilis	Areceae	Arecoideae	0	1	red
Pinanga grandis	Pinanga	grandis	Areceae	Arecoideae	1	0	green
Pinanga griffithii	Pinanga	griffithii	Areceae	Arecoideae	1	0	purple, black
Pinanga heterophylla	Pinanga	heterophylla	Areceae	Arecoideae	0	1	green, red, black
Pinanga humilis	Pinanga	humilis	Areceae	Arecoideae	0	1	white, red
Pinanga insignis	Pinanga	insignis	Areceae	Arecoideae	0	1	red
Pinanga javana	Pinanga	javana	Areceae	Arecoideae	0	1	red, black
Pinanga keahii	Pinanga	keahii	Areceae	Arecoideae	1	0	green
Pinanga kontumensis	Pinanga	kontumensis	Areceae	Arecoideae	1	0	white
Pinanga latisecta	Pinanga	latisecta	Areceae	Arecoideae	1	0	green, black
Pinanga lepidota	Pinanga	lepidota	Areceae	Arecoideae	0	1	orange
Pinanga limosa	Pinanga	limosa	Areceae	Arecoideae	1	0	black
Pinanga maculata	Pinanga	maculata	Areceae	Arecoideae	0	1	red, black
Pinanga malaiana	Pinanga	malaiana	Areceae	Arecoideae	0	1	green, red, purple, black
Pinanga manii	Pinanga	manii	Areceae	Arecoideae	0	1	red, black
Pinanga minuta	Pinanga	minuta	Areceae	Arecoideae	0	1	yellow
Pinanga mirabilis	Pinanga	mirabilis	Areceae	Arecoideae	1	0	brown, purple, black
Pinanga modesta	Pinanga	modesta	Areceae	Arecoideae	0	1	pink, red
Pinanga mooreana	Pinanga	mooreana	Areceae	Arecoideae	0	1	yellow, orange, black
Pinanga paradoxa	Pinanga	paradoxa	Areceae	Arecoideae	0	1	red, black
Pinanga patula	Pinanga	patula	Areceae	Arecoideae	0	1	brown, yellow, red
Pinanga perakensis	Pinanga	perakensis	Areceae	Arecoideae	0	1	pink, black, purple
Pinanga philippinensis	Pinanga	philippinensis	Areceae	Arecoideae	0	1	pink, red, black
Pinanga pilosa	Pinanga	pilosa	Areceae	Arecoideae	0	1	yellow, orange, red
Pinanga polymorpha	Pinanga	polymorpha	Areceae	Arecoideae	1	0	purple, black, blue, green
Pinanga quadrijuga	Pinanga	quadrijuga	Areceae	Arecoideae	0	1	pink, red
Pinanga ridleyana	Pinanga	ridleyana	Areceae	Arecoideae	0	1	red, black
Pinanga rigida	Pinanga	rigida	Areceae	Arecoideae	0	1	red
Pinanga riparia	Pinanga	riparia	Areceae	Arecoideae	0	1	red, black
Pinanga rivularis	Pinanga	rivularis	Areceae	Arecoideae	1	0	green, cream
Pinanga rumphiana	Pinanga	rumphiana	Areceae	Arecoideae	0	1	red
Pinanga salicifolia	Pinanga	salicifolia	Areceae	Arecoideae	1	0	green, brown
Pinanga scortechinii	Pinanga	scortechinii	Areceae	Arecoideae	0	1	black, red
Pinanga sessilifolia	Pinanga	sessilifolia	Areceae	Arecoideae	1	0	purple, black
Pinanga sierramadreana	Pinanga	sierramadreana	Areceae	Arecoideae	0	1	red, purple, black
Pinanga simplicifrons	Pinanga	simplicifrons	Areceae	Arecoideae	0	1	red
Pinanga sobolifera	Pinanga	sobolifera	Areceae	Arecoideae	1	0	black
Pinanga speciosa	Pinanga	speciosa	Areceae	Arecoideae	1	0	black
Pinanga stylosa	Pinanga	stylosa	Areceae	Arecoideae	0	1	red
Pinanga subintegra	Pinanga	subintegra	Areceae	Arecoideae	0	1	red
Pinanga sylvestris	Pinanga	sylvestris	Areceae	Arecoideae	0	1	red
Pinanga tashiroi	Pinanga	tashiroi	Areceae	Arecoideae	0	1	red
Pinanga tenacinervis	Pinanga	tenacinervis	Areceae	Arecoideae	0	1	red
Pinanga tenella	Pinanga	tenella	Areceae	Arecoideae	1	0	green, cream, white
Pinanga tomentella	Pinanga	tomentella	Areceae	Arecoideae	0	1	green, red, black
Pinanga veitchii	Pinanga	veitchii	Areceae	Arecoideae	0	1	red
Pinanga versicolor	Pinanga	versicolor	Areceae	Arecoideae	1	0	white
Pinanga watanaiana	Pinanga	watanaiana	Areceae	Arecoideae	0	1	red, black
Plectocomia assamica	Plectocomia	assamica	Calameae	Calamoideae	1	0	brown
Plectocomia elongata	Plectocomia	elongata	Calameae	Calamoideae	1	0	brown
Plectocomia himalayana	Plectocomia	himalayana	Calameae	Calamoideae	1	0	brown
Plectocomia khasyana	Plectocomia	khasyana	Calameae	Calamoideae	1	0	brown
Plectocomia microstachys	Plectocomia	microstachys	Calameae	Calamoideae	1	0	brown
Plectocomia mulleri	Plectocomia	mulleri	Calameae	Calamoideae	1	0	brown
Plectocomia pierreana	Plectocomia	pierreana	Calameae	Calamoideae	1	0	brown
Plectocomiopsis corneri	Plectocomiopsis	corneri	Calameae	Calamoideae	1	0	brown
Plectocomiopsis geminiflora	Plectocomiopsis	geminiflora	Calameae	Calamoideae	1	0	brown
Plectocomiopsis mira	Plectocomiopsis	mira	Calameae	Calamoideae	1	0	brown
Plectocomiopsis triquetra	Plectocomiopsis	triquetra	Calameae	Calamoideae	1	0	brown
Plectocomiopsis wrayi	Plectocomiopsis	wrayi	Calameae	Calamoideae	1	0	brown
Podococcus acaulis	Podococcus	acaulis	Podococceae	Arecoideae	1	0	brown
Podococcus barteri	Podococcus	barteri	Podococceae	Arecoideae	0	1	orange, red, brown
Pogonotium divaricatum	Pogonotium	divaricatum	Calameae	Calamoideae	1	0	brown
Pogonotium moorei	Pogonotium	moorei	Calameae	Calamoideae	1	0	brown
Pogonotium ursinum	Pogonotium	ursinum	Calameae	Calamoideae	1	0	brown
Ponapea hentyi	Ponapea	hentyi	Areceae	Arecoideae	0	1	red
Ponapea hosinoi	Ponapea	hosinoi	Areceae	Arecoideae	0	1	red
Ponapea ledermanniana	Ponapea	ledermanniana	Areceae	Arecoideae	0	1	red
Prestoea acuminata	Prestoea	acuminata	Euterpeae	Arecoideae	1	0	purple, black
Prestoea carderi	Prestoea	carderi	Euterpeae	Arecoideae	1	0	purple, black
Prestoea decurrens	Prestoea	decurrens	Euterpeae	Arecoideae	1	0	purple, black
Prestoea ensiformis	Prestoea	ensiformis	Euterpeae	Arecoideae	1	0	purple, black
Prestoea longepetiolata	Prestoea	longepetiolata	Euterpeae	Arecoideae	1	0	purple
Prestoea pubens	Prestoea	pubens	Euterpeae	Arecoideae	1	0	purple, black
Prestoea pubigera	Prestoea	pubigera	Euterpeae	Arecoideae	1	0	purple, black
Prestoea schultzeana	Prestoea	schultzeana	Euterpeae	Arecoideae	1	0	purple, black
Prestoea simplicifolia	Prestoea	simplicifolia	Euterpeae	Arecoideae	1	0	purple, black
Prestoea tenuiramosa	Prestoea	tenuiramosa	Euterpeae	Arecoideae	1	0	purple, black
Pritchardia arecina	Pritchardia	arecina	Trachycarpeae	Coryphoideae	1	0	brown, black
Pritchardia bakeri	Pritchardia	bakeri	Trachycarpeae	Coryphoideae	1	0	green, brown, black
Pritchardia beccariana	Pritchardia	beccariana	Trachycarpeae	Coryphoideae	1	0	brown, black
Pritchardia flynnii	Pritchardia	flynnii	Trachycarpeae	Coryphoideae	1	0	brown, black
Pritchardia forbesiana	Pritchardia	forbesiana	Trachycarpeae	Coryphoideae	1	0	brown, black
Pritchardia glabrata	Pritchardia	glabrata	Trachycarpeae	Coryphoideae	1	0	brown, black
Pritchardia gordonii	Pritchardia	gordonii	Trachycarpeae	Coryphoideae	1	0	brown, black
Pritchardia hardyi	Pritchardia	hardyi	Trachycarpeae	Coryphoideae	1	0	brown, black
Pritchardia hillebrandii	Pritchardia	hillebrandii	Trachycarpeae	Coryphoideae	1	0	brown, black
Pritchardia kaalae	Pritchardia	kaalae	Trachycarpeae	Coryphoideae	1	0	brown, black
Pritchardia kahukuensis	Pritchardia	kahukuensis	Trachycarpeae	Coryphoideae	1	0	brown, black
Pritchardia lanigera	Pritchardia	lanigera	Trachycarpeae	Coryphoideae	1	0	brown, black
Pritchardia lowreyana	Pritchardia	lowreyana	Trachycarpeae	Coryphoideae	1	0	brown, black
Pritchardia maideniana	Pritchardia	maideniana	Trachycarpeae	Coryphoideae	1	0	brown, black
Pritchardia martii	Pritchardia	martii	Trachycarpeae	Coryphoideae	1	0	brown, black
Pritchardia minor	Pritchardia	minor	Trachycarpeae	Coryphoideae	1	0	brown, black
Pritchardia mitiaroana	Pritchardia	mitiaroana	Trachycarpeae	Coryphoideae	1	0	brown, black
Pritchardia munroi	Pritchardia	munroi	Trachycarpeae	Coryphoideae	1	0	brown, black
Pritchardia napaliensis	Pritchardia	napaliensis	Trachycarpeae	Coryphoideae	1	0	brown, black
Pritchardia pacifica	Pritchardia	pacifica	Trachycarpeae	Coryphoideae	1	0	brown, black
Pritchardia perlmanii	Pritchardia	perlmanii	Trachycarpeae	Coryphoideae	1	0	brown, black
Pritchardia remota	Pritchardia	remota	Trachycarpeae	Coryphoideae	1	0	brown, black
Pritchardia schattaueri	Pritchardia	schattaueri	Trachycarpeae	Coryphoideae	1	0	brown, black
Pritchardia thurstonii	Pritchardia	thurstonii	Trachycarpeae	Coryphoideae	1	0	brown, black
Pritchardia viscosa	Pritchardia	viscosa	Trachycarpeae	Coryphoideae	1	0	brown, black
Pritchardia waialealeana	Pritchardia	waialealeana	Trachycarpeae	Coryphoideae	1	0	brown, black
Pritchardia woodii	Pritchardia	woodii	Trachycarpeae	Coryphoideae	1	0	brown, black
Pseudophoenix ekmanii	Pseudophoenix	ekmanii	Cyclosphatheae	Ceroxyloideae	0	1	red
Pseudophoenix lediniana	Pseudophoenix	lediniana	Cyclosphatheae	Ceroxyloideae	0	1	red
Pseudophoenix sargentii	Pseudophoenix	sargentii	Cyclosphatheae	Ceroxyloideae	0	1	red
Pseudophoenix vinifera	Pseudophoenix	vinifera	Cyclosphatheae	Ceroxyloideae	0	1	red
Ptychococcus lepidotus	Ptychococcus	lepidotus	Areceae	Arecoideae	0	1	orange, purple, black
Ptychococcus paradoxus	Ptychococcus	paradoxus	Areceae	Arecoideae	0	1	orange, red
Ptychosperma ambiguum	Ptychosperma	ambiguum	Areceae	Arecoideae	0	1	red
Ptychosperma buabe	Ptychosperma	buabe	Areceae	Arecoideae	1	0	black, purple
Ptychosperma caryotoides	Ptychosperma	caryotoides	Areceae	Arecoideae	0	1	orange, red
Ptychosperma cuneatum	Ptychosperma	cuneatum	Areceae	Arecoideae	1	0	black
Ptychosperma elegans	Ptychosperma	elegans	Areceae	Arecoideae	0	1	red
Ptychosperma furcatum	Ptychosperma	furcatum	Areceae	Arecoideae	0	1	red
Ptychosperma gracile	Ptychosperma	gracile	Areceae	Arecoideae	0	1	red
Ptychosperma halmaherense	Ptychosperma	halmaherense	Areceae	Arecoideae	0	1	yellow, orange
Ptychosperma lauterbachii	Ptychosperma	lauterbachii	Areceae	Arecoideae	0	1	orange, red
Ptychosperma lineare	Ptychosperma	lineare	Areceae	Arecoideae	0	1	green, pink, black, purple
Ptychosperma macarthurii	Ptychosperma	macarthurii	Areceae	Arecoideae	0	1	red
Ptychosperma mambare	Ptychosperma	mambare	Areceae	Arecoideae	1	0	purple
Ptychosperma microcarpum	Ptychosperma	microcarpum	Areceae	Arecoideae	0	1	red
Ptychosperma nicolai	Ptychosperma	nicolai	Areceae	Arecoideae	0	1	red
Ptychosperma propinquum	Ptychosperma	propinquum	Areceae	Arecoideae	0	1	red
Ptychosperma pullenii	Ptychosperma	pullenii	Areceae	Arecoideae	1	0	black, purple
Ptychosperma ramosissimum	Ptychosperma	ramosissimum	Areceae	Arecoideae	0	1	red, orange
Ptychosperma rosselense	Ptychosperma	rosselense	Areceae	Arecoideae	0	1	red
Ptychosperma salomonense	Ptychosperma	salomonense	Areceae	Arecoideae	0	1	red
Ptychosperma sanderianum	Ptychosperma	sanderianum	Areceae	Arecoideae	0	1	red
Ptychosperma schefferi	Ptychosperma	schefferi	Areceae	Arecoideae	1	0	brown, black, purple
Ptychosperma streimannii	Ptychosperma	streimannii	Areceae	Arecoideae	1	0	black, purple
Ptychosperma tagulense	Ptychosperma	tagulense	Areceae	Arecoideae	0	1	yellow
Ptychosperma vestitum	Ptychosperma	vestitum	Areceae	Arecoideae	1	0	black, purple
Ptychosperma waitianum	Ptychosperma	waitianum	Areceae	Arecoideae	1	0	black, purple
Raphia africana	Raphia	africana	Lepidocaryeae	Calamoideae	1	0	brown, ivory
Raphia australis	Raphia	australis	Lepidocaryeae	Calamoideae	1	0	brown
Raphia farinifera	Raphia	farinifera	Lepidocaryeae	Calamoideae	1	0	brown
Raphia gentiliana	Raphia	gentiliana	Lepidocaryeae	Calamoideae	1	0	brown
Raphia hookeri	Raphia	hookeri	Lepidocaryeae	Calamoideae	1	0	brown
Raphia laurentii	Raphia	laurentii	Lepidocaryeae	Calamoideae	0	1	orange, red, green
Raphia longiflora	Raphia	longiflora	Lepidocaryeae	Calamoideae	1	0	brown
Raphia mambillensis	Raphia	mambillensis	Lepidocaryeae	Calamoideae	1	0	brown
Raphia mannii	Raphia	mannii	Lepidocaryeae	Calamoideae	0	1	yellow
Raphia matombe	Raphia	matombe	Lepidocaryeae	Calamoideae	1	0	brown
Raphia monbuttorum	Raphia	monbuttorum	Lepidocaryeae	Calamoideae	1	0	brown
Raphia palma-pinus	Raphia	palma-pinus	Lepidocaryeae	Calamoideae	0	1	red, brown
Raphia regalis	Raphia	regalis	Lepidocaryeae	Calamoideae	1	0	brown
Raphia rostrata	Raphia	rostrata	Lepidocaryeae	Calamoideae	1	0	brown
Raphia ruwenzorica	Raphia	ruwenzorica	Lepidocaryeae	Calamoideae	1	0	brown
Raphia sese	Raphia	sese	Lepidocaryeae	Calamoideae	1	0	brown
Raphia sudanica	Raphia	sudanica	Lepidocaryeae	Calamoideae	0	1	red, brown
Raphia taedigera	Raphia	taedigera	Lepidocaryeae	Calamoideae	1	0	brown
Raphia textilis	Raphia	textilis	Lepidocaryeae	Calamoideae	1	0	brown
Raphia vinifera	Raphia	vinifera	Lepidocaryeae	Calamoideae	1	0	brown
Ravenea beentjei	Ravenea	beentjei	Ceroxyleae	Ceroxyloideae	1	0	black
Ravenea dransfieldii	Ravenea	dransfieldii	Ceroxyleae	Ceroxyloideae	0	1	orange
Ravenea glauca	Ravenea	glauca	Ceroxyleae	Ceroxyloideae	0	1	yellow
Ravenea hildebrandtii	Ravenea	hildebrandtii	Ceroxyleae	Ceroxyloideae	0	1	yellow
Ravenea krociana	Ravenea	krociana	Ceroxyleae	Ceroxyloideae	0	1	orange
Ravenea lakatra	Ravenea	lakatra	Ceroxyleae	Ceroxyloideae	1	0	black
Ravenea latisecta	Ravenea	latisecta	Ceroxyleae	Ceroxyloideae	0	1	yellow, red
Ravenea louvelii	Ravenea	louvelii	Ceroxyleae	Ceroxyloideae	1	0	purple
Ravenea madagascariensis	Ravenea	madagascariensis	Ceroxyleae	Ceroxyloideae	0	1	orange
Ravenea moorei	Ravenea	moorei	Ceroxyleae	Ceroxyloideae	0	1	yellow, orange
Ravenea musicalis	Ravenea	musicalis	Ceroxyleae	Ceroxyloideae	0	1	orange
Ravenea nana	Ravenea	nana	Ceroxyleae	Ceroxyloideae	1	0	green
Ravenea rivularis	Ravenea	rivularis	Ceroxyleae	Ceroxyloideae	0	1	red
Ravenea robustior	Ravenea	robustior	Ceroxyleae	Ceroxyloideae	0	1	orange, black, purple
Ravenea sambiranensis	Ravenea	sambiranensis	Ceroxyleae	Ceroxyloideae	0	1	orange, red
Ravenea xerophila	Ravenea	xerophila	Ceroxyleae	Ceroxyloideae	0	1	yellow
Reinhardtia elegans	Reinhardtia	elegans	Reinhardtieae	Arecoideae	1	0	purple, black
Reinhardtia gracilis	Reinhardtia	gracilis	Reinhardtieae	Arecoideae	1	0	purple, black
Reinhardtia koschnyana	Reinhardtia	koschnyana	Reinhardtieae	Arecoideae	1	0	purple, black
Reinhardtia latisecta	Reinhardtia	latisecta	Reinhardtieae	Arecoideae	1	0	purple, black
Reinhardtia paiewonskiana	Reinhardtia	paiewonskiana	Reinhardtieae	Arecoideae	1	0	purple, black
Reinhardtia simplex	Reinhardtia	simplex	Reinhardtieae	Arecoideae	1	0	purple, black
Retispatha dumetosa	Retispatha	dumetosa	Calameae	Calamoideae	1	0	brown
Rhapidophyllum hystrix	Rhapidophyllum	hystrix	Trachycarpeae	Coryphoideae	1	0	brown
Rhapis excelsa	Rhapis	excelsa	Trachycarpeae	Coryphoideae	0	1	yellow
Rhapis gracilis	Rhapis	gracilis	Trachycarpeae	Coryphoideae	1	0	blue, green
Rhapis micrantha	Rhapis	micrantha	Trachycarpeae	Coryphoideae	1	0	white
Rhapis multifida	Rhapis	multifida	Trachycarpeae	Coryphoideae	0	1	yellow
Rhapis puhuongensis	Rhapis	puhuongensis	Trachycarpeae	Coryphoideae	1	0	white
Rhapis robusta	Rhapis	robusta	Trachycarpeae	Coryphoideae	1	0	green
Rhapis subtilis	Rhapis	subtilis	Trachycarpeae	Coryphoideae	1	0	white
Rhapis vidalii	Rhapis	vidalii	Trachycarpeae	Coryphoideae	1	0	white
Rhopaloblaste augusta	Rhopaloblaste	augusta	Areceae	Arecoideae	0	1	orange, red
Rhopaloblaste ceramica	Rhopaloblaste	ceramica	Areceae	Arecoideae	0	1	red
Rhopaloblaste elegans	Rhopaloblaste	elegans	Areceae	Arecoideae	0	1	orange
Rhopaloblaste ledermanniana	Rhopaloblaste	ledermanniana	Areceae	Arecoideae	0	1	orange, red
Rhopaloblaste singaporensis	Rhopaloblaste	singaporensis	Areceae	Arecoideae	0	1	orange, red
Rhopalostylis baueri	Rhopalostylis	baueri	Areceae	Arecoideae	0	1	red
Rhopalostylis sapida	Rhopalostylis	sapida	Areceae	Arecoideae	0	1	red
Roscheria melanochaetes	Roscheria	melanochaetes	Areceae	Arecoideae	0	1	red
Roystonea altissima	Roystonea	altissima	Roystoneeae	Arecoideae	1	0	purple, black
Roystonea borinquena	Roystonea	borinquena	Roystoneeae	Arecoideae	1	0	brown, black
Roystonea dunlapiana	Roystonea	dunlapiana	Roystoneeae	Arecoideae	1	0	purple, black
Roystonea lenis	Roystonea	lenis	Roystoneeae	Arecoideae	1	0	purple, black
Roystonea maisiana	Roystonea	maisiana	Roystoneeae	Arecoideae	1	0	purple, black
Roystonea oleracea	Roystonea	oleracea	Roystoneeae	Arecoideae	1	0	purple, black
Roystonea princeps	Roystonea	princeps	Roystoneeae	Arecoideae	1	0	purple, black
Roystonea regia	Roystonea	regia	Roystoneeae	Arecoideae	1	0	brown, purple, black
Roystonea stellata	Roystonea	stellata	Roystoneeae	Arecoideae	1	0	purple, black
Roystonea violacea	Roystonea	violacea	Roystoneeae	Arecoideae	1	0	purple, black
Sabal bermudana	Sabal	bermudana	Sabaleae	Coryphoideae	1	0	black
Sabal causiarum	Sabal	causiarum	Sabaleae	Coryphoideae	1	0	black
Sabal domingensis	Sabal	domingensis	Sabaleae	Coryphoideae	1	0	black
Sabal etonia	Sabal	etonia	Sabaleae	Coryphoideae	1	0	black
Sabal gretherae	Sabal	gretherae	Sabaleae	Coryphoideae	1	0	black
Sabal maritima	Sabal	maritima	Sabaleae	Coryphoideae	1	0	black
Sabal mauritiiformis	Sabal	mauritiiformis	Sabaleae	Coryphoideae	1	0	black
Sabal mexicana	Sabal	mexicana	Sabaleae	Coryphoideae	1	0	black
Sabal minor	Sabal	minor	Sabaleae	Coryphoideae	1	0	brown, black
Sabal palmetto	Sabal	palmetto	Sabaleae	Coryphoideae	1	0	black
Sabal pumos	Sabal	pumos	Sabaleae	Coryphoideae	1	0	brown, black
Sabal rosei	Sabal	rosei	Sabaleae	Coryphoideae	1	0	brown, black
Sabal uresana	Sabal	uresana	Sabaleae	Coryphoideae	1	0	brown, black
Sabal yapa	Sabal	yapa	Sabaleae	Coryphoideae	1	0	brown, black
Salacca affinis	Salacca	affinis	Calameae	Calamoideae	1	0	brown
Salacca clemensiana	Salacca	clemensiana	Calameae	Calamoideae	1	0	brown
Salacca dolicholepis	Salacca	dolicholepis	Calameae	Calamoideae	1	0	black
Salacca glabrescens	Salacca	glabrescens	Calameae	Calamoideae	0	1	red
Salacca griffithii	Salacca	griffithii	Calameae	Calamoideae	1	0	brown
Salacca magnifica	Salacca	magnifica	Calameae	Calamoideae	0	1	pink, brown
Salacca ramosiana	Salacca	ramosiana	Calameae	Calamoideae	1	0	brown
Salacca secunda	Salacca	secunda	Calameae	Calamoideae	1	0	brown
Salacca stolonifera	Salacca	stolonifera	Calameae	Calamoideae	1	0	brown
Salacca sumatrana	Salacca	sumatrana	Calameae	Calamoideae	1	0	green
Salacca vermicularis	Salacca	vermicularis	Calameae	Calamoideae	1	0	black
Salacca wallichiana	Salacca	wallichiana	Calameae	Calamoideae	1	0	brown
Salacca zalacca	Salacca	zalacca	Calameae	Calamoideae	1	0	brown
Saribus chocolatinus	Saribus	chocolatinus	Trachycarpeae	Coryphoideae	0	1	orange, red
Saribus jeanneneyi	Saribus	jeanneneyi	Trachycarpeae	Coryphoideae	1	0	purple
Saribus merrillii	Saribus	merrillii	Trachycarpeae	Coryphoideae	0	1	red
Saribus papuanus	Saribus	papuanus	Trachycarpeae	Coryphoideae	0	1	orange, red
Saribus rotundifolius	Saribus	rotundifolius	Trachycarpeae	Coryphoideae	0	1	orange, red, purple, black
Saribus surru	Saribus	surru	Trachycarpeae	Coryphoideae	0	1	orange, red
Saribus tothur	Saribus	tothur	Trachycarpeae	Coryphoideae	0	1	orange, red
Saribus woodfordii	Saribus	woodfordii	Trachycarpeae	Coryphoideae	0	1	orange, brown
Satakentia liukiuensis	Satakentia	liukiuensis	Areceae	Arecoideae	1	0	black
Satranala decussilvae	Satranala	decussilvae	Borasseae	Coryphoideae	1	0	purple, black
Schippia concolor	Schippia	concolor	Cryosophileae	Coryphoideae	1	0	white
Sclerosperma mannii	Sclerosperma	mannii	Sclerospermeae	Arecoideae	1	0	black
Sclerosperma profizianum	Sclerosperma	profizianum	Sclerospermeae	Arecoideae	1	0	black
Sclerosperma walkeri	Sclerosperma	walkeri	Sclerospermeae	Arecoideae	1	0	black
Serenoa repens	Serenoa	repens	Trachycarpeae	Coryphoideae	1	0	blue, black
Socratea exorrhiza	Socratea	exorrhiza	Irarteeae	Arecoideae	0	1	yellow
Socratea hecatonandra	Socratea	hecatonandra	Irarteeae	Arecoideae	1	0	green
Socratea rostrata	Socratea	rostrata	Irarteeae	Arecoideae	1	0	brown, green
Socratea salazarii	Socratea	salazarii	Irarteeae	Arecoideae	0	1	yellow
Solfia samoensis	Solfia	samoensis	Areceae	Arecoideae	0	1	red
Sommieria leucophylla	Sommieria	leucophylla	Pelagodoxeae	Arecoideae	0	1	brown, pink
Syagrus amara	Syagrus	amara	Cocoseae	Arecoideae	0	1	orange
Syagrus botryophora	Syagrus	botryophora	Cocoseae	Arecoideae	1	0	green
Syagrus campylospatha	Syagrus	campylospatha	Cocoseae	Arecoideae	0	1	yellow
Syagrus cardenasii	Syagrus	cardenasii	Cocoseae	Arecoideae	1	0	brown
Syagrus cearensis	Syagrus	cearensis	Cocoseae	Arecoideae	0	1	green, orange
Syagrus cocoides	Syagrus	cocoides	Cocoseae	Arecoideae	1	0	brown
Syagrus comosa	Syagrus	comosa	Cocoseae	Arecoideae	0	1	green, yellow, brown
Syagrus coronata	Syagrus	coronata	Cocoseae	Arecoideae	0	1	green, orange
Syagrus flexuosa	Syagrus	flexuosa	Cocoseae	Arecoideae	0	1	yellow
Syagrus glaucescens	Syagrus	glaucescens	Cocoseae	Arecoideae	0	1	orange, brown
Syagrus harleyi	Syagrus	harleyi	Cocoseae	Arecoideae	0	1	orange
Syagrus inajai	Syagrus	inajai	Cocoseae	Arecoideae	0	1	yellow
Syagrus macrocarpa	Syagrus	macrocarpa	Cocoseae	Arecoideae	1	0	green
Syagrus microphylla	Syagrus	microphylla	Cocoseae	Arecoideae	1	0	green, brown
Syagrus mirandana	Syagrus	mirandana	Cocoseae	Arecoideae	1	0	green
Syagrus oleracea	Syagrus	oleracea	Cocoseae	Arecoideae	1	0	green
Syagrus orinocensis	Syagrus	orinocensis	Cocoseae	Arecoideae	0	1	yellow, brown
Syagrus petraea	Syagrus	petraea	Cocoseae	Arecoideae	1	0	green
Syagrus picrophylla	Syagrus	picrophylla	Cocoseae	Arecoideae	1	0	brown
Syagrus pleioclada	Syagrus	pleioclada	Cocoseae	Arecoideae	1	0	green
Syagrus pseudococos	Syagrus	pseudococos	Cocoseae	Arecoideae	0	1	yellow
Syagrus romanzoffiana	Syagrus	romanzoffiana	Cocoseae	Arecoideae	0	1	yellow, orange
Syagrus ruschiana	Syagrus	ruschiana	Cocoseae	Arecoideae	0	1	orange
Syagrus sancona	Syagrus	sancona	Cocoseae	Arecoideae	0	1	yellow, orange
Syagrus schizophylla	Syagrus	schizophylla	Cocoseae	Arecoideae	0	1	red, orange
Syagrus smithii	Syagrus	smithii	Cocoseae	Arecoideae	0	1	yellow
Syagrus stratincola	Syagrus	stratincola	Cocoseae	Arecoideae	1	0	green
Syagrus tostana	Syagrus	tostana	Cocoseae	Arecoideae	0	1	orange
Syagrus vagans	Syagrus	vagans	Cocoseae	Arecoideae	1	0	green
Syagrus vermicularis	Syagrus	vermicularis	Cocoseae	Arecoideae	0	1	yellow
Syagrus werdermannii	Syagrus	werdermannii	Cocoseae	Arecoideae	1	0	green
Synechanthus fibrosus	Synechanthus	fibrosus	Chamaedoreeae	Arecoideae	0	1	orange, red
Synechanthus warscewiczianus	Synechanthus	warscewiczianus	Chamaedoreeae	Arecoideae	0	1	red
Tahina spectabilis	Tahina	spectabilis	Chuniophoeniceae	Coryphoideae	1	0	green
Tectiphiala ferox	Tectiphiala	ferox	Areceae	Arecoideae	1	0	blue, black
Thrinax excelsa	Thrinax	excelsa	Cryosophileae	Coryphoideae	1	0	white
Thrinax parviflora	Thrinax	parviflora	Cryosophileae	Coryphoideae	1	0	white
Thrinax radiata	Thrinax	radiata	Cryosophileae	Coryphoideae	1	0	white
Trachycarpus fortunei	Trachycarpus	fortunei	Trachycarpeae	Coryphoideae	1	0	black
Trachycarpus geminisectus	Trachycarpus	geminisectus	Trachycarpeae	Coryphoideae	1	0	black
Trachycarpus latisectus	Trachycarpus	latisectus	Trachycarpeae	Coryphoideae	1	0	brown
Trachycarpus martianus	Trachycarpus	martianus	Trachycarpeae	Coryphoideae	1	0	black
Trachycarpus nanus	Trachycarpus	nanus	Trachycarpeae	Coryphoideae	1	0	brown
Trachycarpus oreophilus	Trachycarpus	oreophilus	Trachycarpeae	Coryphoideae	0	1	yellow, brown
Trachycarpus princeps	Trachycarpus	princeps	Trachycarpeae	Coryphoideae	1	0	black
Trachycarpus takil	Trachycarpus	takil	Trachycarpeae	Coryphoideae	1	0	black
Trachycarpus ukhrulensis	Trachycarpus	ukhrulensis	Trachycarpeae	Coryphoideae	0	1	yellow, brown
Trithrinax biflabellata	Trithrinax	biflabellata	Cryosophileae	Coryphoideae	1	0	green
Trithrinax brasiliensis	Trithrinax	brasiliensis	Cryosophileae	Coryphoideae	0	1	yellow
Trithrinax campestris	Trithrinax	campestris	Cryosophileae	Coryphoideae	0	1	yellow
Trithrinax schizophylla	Trithrinax	schizophylla	Cryosophileae	Coryphoideae	1	0	white
Veitchia arecina	Veitchia	arecina	Areceae	Arecoideae	0	1	red
Veitchia filifera	Veitchia	filifera	Areceae	Arecoideae	0	1	yellow, orange, red
Veitchia joannis	Veitchia	joannis	Areceae	Arecoideae	0	1	red
Veitchia pachyclada	Veitchia	pachyclada	Areceae	Arecoideae	0	1	orange
Veitchia simulans	Veitchia	simulans	Areceae	Arecoideae	0	1	red
Veitchia spiralis	Veitchia	spiralis	Areceae	Arecoideae	0	1	yellow, red
Veitchia subdisticha	Veitchia	subdisticha	Areceae	Arecoideae	0	1	orange
Veitchia winin	Veitchia	winin	Areceae	Arecoideae	0	1	red
Verschaffeltia splendida	Verschaffeltia	splendida	Areceae	Arecoideae	1	0	brown
Voanioala gerardii	Voanioala	gerardii	Cocoseae	Arecoideae	1	0	brown
Wallichia caryotoides	Wallichia	caryotoides	Caryoteae	Coryphoideae	0	1	red
Wallichia disticha	Wallichia	disticha	Caryoteae	Coryphoideae	1	0	brown
Wallichia gracilis	Wallichia	gracilis	Caryoteae	Coryphoideae	0	1	brown, yellow
Wallichia marianneae	Wallichia	marianneae	Caryoteae	Coryphoideae	1	0	purple
Wallichia nana	Wallichia	nana	Caryoteae	Coryphoideae	1	0	white
Wallichia oblongifolia	Wallichia	oblongifolia	Caryoteae	Coryphoideae	1	0	brown
Wallichia triandra	Wallichia	triandra	Caryoteae	Coryphoideae	0	1	red
Washingtonia filifera	Washingtonia	filifera	Trachycarpeae	Coryphoideae	1	0	black
Washingtonia robusta	Washingtonia	robusta	Trachycarpeae	Coryphoideae	1	0	black
Welfia regia	Welfia	regia	Geonomateae	Arecoideae	1	0	brown
Wendlandiella gracilis	Wendlandiella	gracilis	Chamaedoreeae	Arecoideae	0	1	orange, red
Wettinia aequalis	Wettinia	aequalis	Irarteeae	Arecoideae	0	1	yellow
Wettinia aequatorialis	Wettinia	aequatorialis	Irarteeae	Arecoideae	1	0	green
Wettinia anomala	Wettinia	anomala	Irarteeae	Arecoideae	1	0	brown
Wettinia augusta	Wettinia	augusta	Irarteeae	Arecoideae	1	0	green
Wettinia disticha	Wettinia	disticha	Irarteeae	Arecoideae	1	0	green
Wettinia drudei	Wettinia	drudei	Irarteeae	Arecoideae	0	1	yellow
Wettinia fascicularis	Wettinia	fascicularis	Irarteeae	Arecoideae	1	0	brown
Wettinia hirsuta	Wettinia	hirsuta	Irarteeae	Arecoideae	1	0	brown
Wettinia kalbreyeri	Wettinia	kalbreyeri	Irarteeae	Arecoideae	1	0	green
Wettinia longipetala	Wettinia	longipetala	Irarteeae	Arecoideae	1	0	brown
Wettinia microcarpa	Wettinia	microcarpa	Irarteeae	Arecoideae	1	0	black
Wettinia oxycarpa	Wettinia	oxycarpa	Irarteeae	Arecoideae	1	0	brown
Wettinia panamensis	Wettinia	panamensis	Irarteeae	Arecoideae	1	0	brown
Wettinia praemorsa	Wettinia	praemorsa	Irarteeae	Arecoideae	1	0	green, brown
Wettinia quinaria	Wettinia	quinaria	Irarteeae	Arecoideae	1	0	brown, green
Wettinia radiata	Wettinia	radiata	Irarteeae	Arecoideae	0	1	yellow
Wettinia verruculosa	Wettinia	verruculosa	Irarteeae	Arecoideae	1	0	green, brown
Wodyetia bifurcata	Wodyetia	bifurcata	Areceae	Arecoideae	0	1	red
Zombia antillarum	Zombia	antillarum	Cryosophileae	Coryphoideae	1	0	white

## Sheet: Fig data
Number	FicusSpecies	Colour	Non-conspicuous	Conspicuous	Classified colour(s)	Reference	NoteFruit	NoteLocation	NoteSubspecies
1	F. abscondita	blackish	1	0	Black	Berg (1980)	unknown
1	F. abscondita	blackish	1	0	Black	Berg, Hijman & Weerdenburg (1984)	unknown
2	F. abutilifolia	red	0	1	Red	Dominy et al. (2003)	at maturity
2	F. abutilifolia	red	0	1	Red	Van Greuning (1990)	ripe
2	F. abutilifolia	reddish with yellowish spots (or entirely yellowish)	0	1	Red	Berg & Wiebes (1992)	at maturity
3	F. adolfi-friderici	yellow	0	1	Yellow	Ebika (2010)	ripe
4	F. amadiensis	red	0	1	Red	Dominy et al. (2003)	at maturity
4	F. amadiensis	yellow with red spots or entirely reddish	0	1	Yellow	Berg & Wiebes (1992)	at maturity
4	F. amadiensis	yellow to red to purple	0	1	Yellow, Red, Purple	Beentje & Mbago (2007)	ripe
5	F. ardisioides	yellow with red spots	0	1	Yellow	Ebika (2010)	ripe
5	F. ardisioides	yellow-green with red spots, turning purple-red when mature	1	0	Purple, Red	Burrows & Burrows (2003)	at maturity
6	F. artocarpoides	greenish to purplish or yellow to orange	0	1	Yellow, Orange	Berg & Wiebes (1992)	at maturity
6	F. artocarpoides	greenish yellow to purple	0	1	Yellow, Purple	Beentje & Mbago (2007)	ripe
6	F. artocarpoides	greenish to purplish	1	0	Green, Purple	Berg, Hijman & Weerdenburg (1985)	at maturity
6	F. artocarpoides	greenish to purplish	1	0	Green, Purple	Berg, Hijman & Weerdenburg (1984)	at maturity
7	F. asperifolia	yellow or red	0	1	Yellow, Red	Dominy et al. (2003)	at maturity
7	F. asperifolia	dark pink to red to orange (or yellowish?)	0	1	Pink, Red, Orange	Berg & Wiebes (1992)	at maturity
7	F. asperifolia	yellow, orange or red	0	1	Yellow, Orange, Red	Beentje & Mbago (2007)	ripe
8	F. barteri	yellow to orange	0	1	Yellow, Orange	Berg & Wiebes (1992)	at maturity
8	F. barteri	orange	0	1	Orange	Berg, Hijman & Weerdenburg (1984)	at maturity
9	F. bizanae	yellow	0	1	Yellow	Dominy et al. (2003)	at maturity
9	F. bizanae	yellowish-green	1	0	Green	Van Greuning (1990)	ripe
9	F. bizanae	yellow-green	1	0	Green	Berg & Wiebes (1992)	at maturity
10	F. bubu	brownish	1	0	Brown	Dominy et al. (2003)	at maturity
10	F. bubu	yellowish-green	1	0	Green	Van Greuning (1990)	ripe
10	F. bubu	brownish	1	0	Brown	Berg & Wiebes (1992)	at maturity
10	F. bubu	brownish	1	0	Brown	Berg, Hijman & Weerdenburg (1985)	at maturity
11	F. burretiana
12	F. burtt-davyi	green	1	0	Green	Dominy et al. (2003)	at maturity
12	F. burtt-davyi	dark-brown to black	1	0	Brown, Black	Berg & Wiebes (1992)	at maturity
13	F. bussei	green with whitish warts	1	0	Green	Dominy et al. (2003)	at maturity
13	F. bussei	greenish	1	0	Green	Berg & Wiebes (1992)	at maturity
14	F. calyptrata	brownish (with orange spots)	1	0	Brown	Berg & Wiebes (1992)	at maturity
14	F. calyptrata	orange to red with red spots	0	1	Orange, Red	Ebika (2010)	ripe
15	F. capreifolia	green or pale yellow	0	1	Green, Yellow	Dominy et al. (2003)	at maturity
15	F. capreifolia	red	0	1	Red	Van Greuning (1990)	ripe
15	F. capreifolia	green to pale yellow	0	1	Green, Yellow	Berg & Wiebes (1992)	at maturity
16	F. chirindensis	green to pale yellow	0	1	Green, Yellow	Dominy et al. (2003)	at maturity
16	F. chirindensis	greenish to pale yellow with brown spots	0	1	Yellow	Berg (1988)	at maturity	Zimbabwe
16	F. chirindensis	greenish to yellowish with brown spots	0	1	Green, Yellow	Berg & Wiebes (1992)	at maturity
17	F. chlamydocarpa	yellow to orange (or red?)	0	1	Yellow, Orange	Berg & Wiebes (1992)	at maturity
18	F. conraui	greenish with reddish spots or warts or partly reddish	1	0	Green	Berg & Wiebes (1992)	at maturity
18	F. conraui	green with reddish, or partially reddish patches or stripes	1	0	Green	Berg, Hijman & Weerdenburg (1985)	at maturity
19	F. cordata	green to red	0	1	Green, Red	Dominy et al. (2003)	at maturity
19	F. cordata	yellowish-green	1	0	Green	Van Greuning (1990)	ripe		cordata
19	F. cordata	red	0	1	Red	Van Greuning (1990)	ripe		salicifolia
19	F. cordata	from green to whitish to orange to dark purple or dark red	0	1	Green, Orange, Purple, Red	Chantarasuwan (2014)	at maturity
19	F. cordata	from green to whitish to orange to dark purple or dark red	0	1	Green, Orange, Purple, Red	Berg & Wiebes (1992)	at maturity
20	F. crassicosta
21	F. craterostoma	yellow or red	0	1	Yellow, Red	Dominy et al. (2003)	at maturity
21	F. craterostoma	reddish (or yellowish)	0	1	Red	Berg & Wiebes (1992)	at maturity
21	F. craterostoma	yellow or red	0	1	Yellow, Red	Beentje & Mbago (2007)	ripe
22	F. cyathistipula	pale green to pale yellow	0	1	Green, Yellow	Berg & Wiebes (1992)	at maturity
22	F. cyathistipula	pale green to pale yellow	0	1	Green, Yellow	Beentje & Mbago (2007)	ripe
23	F. cyathistipuloides
24	F. densistipulata	greenish with yellow spots or partly reddish	1	0	Green	Berg & Wiebes (1992)	at maturity
25	F. dicranostyla	yellowish to pale orange	0	1	Orange	Berg & Wiebes (1992)	at maturity
25	F. dicranostyla	orange-yellow to yellowish green (with pale spots)	0	1	Orange, Yellow, Green	Berg, Hijman & Weerdenburg (1984)	at maturity
26	F. dryepondtiana	green with small white spots	1	0	Green	Berg & Wiebes (1992)	at maturity
26	F. dryepondtiana	yellow with red spots	0	1	Yellow	Ebika (2010)	ripe
26	F. dryepondtiana	green with small white spots	1	0	Green	Berg, Hijman & Weerdenburg (1984)	at maturity
27	F. elasticoides	yellowish to reddish with yellow spots	0	1	Yellow, Red	Ebika (2010)	ripe
28	F. exasperata	red	0	1	Red	Dominy et al. (2003)	at maturity
28	F. exasperata	yellow, orange or reddish	0	1	Yellow, Orange	Berg & Wiebes (1992)	at maturity
28	F. exasperata	yellow, orange to reddish	0	1	Yellow, Orange	Beentje & Mbago (2007)	ripe
29	F. faulkneriana	yellow or red	0	1	Yellow, Red	Dominy et al. (2003)	at maturity
29	F. faulkneriana	yellow to reddish	0	1	Yellow	Berg (1988)	at maturity	Tanzania
29	F. faulkneriana	reddish or yellowish	0	1	Red, Yellow	Berg & Wiebes (1992)	at maturity
30	F. fischeri	yellowish green	1	0	Green	Berg & Wiebes (1992)	at maturity
30	F. fischeri	yellow-green	1	0	Green	Beentje & Mbago (2007)	fresh
31	F. glumosa	orange or red	0	1	Orange, Red	Dominy et al. (2003)	at maturity
31	F. glumosa	red	0	1	Red	Van Greuning (1990)	ripe
31	F. glumosa	orange to red, or pink, often with darker spots	0	1	Orange, Red, Pink	Berg & Wiebes (1992)	at maturity
31	F. glumosa	orange to pink or red	0	1	Orange, Pink, Red	Beentje & Mbago (2007)	ripe
32	F. ilicina	red	0	1	Red	Dominy et al. (2003)	at maturity
32	F. ilicina	yellow	0	1	Yellow	Berg & Wiebes (1992)	at maturity
33	F. ingens	pink, red or purple	0	1	Pink, Red, Purple	Dominy et al. (2003)	at maturity
33	F. ingens	pink	0	1	Pink	Van Greuning (1990)	ripe
33	F. ingens	purple	1	0	Purple	Wilson & Downs (2012)	ripe
33	F. ingens	whitish to pink to yellow or pale red to purple	0	1	Pink, Yellow, Red, Purple	Chantarasuwan (2014)	at maturity
33	F. ingens	whitish to pink or to pale to dark purple	0	1	Pink, Purple	Berg & Wiebes (1992)	at maturity
33	F. ingens	pink, red or purple	0	1	Pink, Red, Purple	Beentje & Mbago (2007)	fresh
34	F. jansii	yellowish	0	1	Yellow	Berg & Wiebes (1992)	at maturity
35	F. kamerunensis	pinkish, reddish or reddish-brown	1	0	Brown	Berg & Wiebes (1992)	at maturity
35	F. kamerunensis	yellow with orange spots	0	1	Yellow	Ebika (2010)	ripe
35	F. kamerunensis	reddish or brown-reddish	1	0	Brown	Berg, Hijman & Weerdenburg (1984)	at maturity
36	F. leonensis
37	F. lingua	yellow or red	0	1	Yellow, Red	Dominy et al. (2003)	at maturity
37	F. lingua	reddish or yellowish	0	1	Red, Yellow	Berg & Wiebes (1992)	at maturity
38	F. louisii
39	F. lutea	yellow or orange	0	1	Yellow, Orange	Dominy et al. (2003)	at maturity
39	F. lutea	red	0	1	Red	Van Greuning (1990)	ripe
39	F. lutea	yellow to brown	0	1	Yellow, Brown	Wilson & Downs (2012)	ripe
39	F. lutea	yellow to orange or brownish	0	1	Yellow, Orange, Brown	Berg & Wiebes (1992)	at maturity
39	F. lutea	yellow to orange	0	1	Yellow, Orange	Beentje & Mbago (2007)	ripe
39	F. lutea	yellow	0	1	Yellow	Ebika (2010)	ripe
40	F. lyrata	greenish, often with paler spots	1	0	Green	Berg & Wiebes (1992)	at maturity
41	F. modesta	yellow with paler spots	0	1	Yellow	Dowsett-Lemaire & White (1990)	ripe
41	F. modesta	yellowish-green with a few small, paler spots	1	0	Green	Burrows & Burrows (2003)	ripe
42	F. mucuso	orange	0	1	Orange	Dominy et al. (2003)	at maturity
42	F. mucuso	red to dark orange	0	1	Red, Orange	Berg & Wiebes (1992)	at maturity
42	F. mucuso	dark orange to red	0	1	Orange, Red	Beentje & Mbago (2007)	ripe
42	F. mucuso	yellow, orange, reddish, or red-brown	0	1	Yellow, Orange, Red, Brown	Berg, Hijman & Weerdenburg (1984)	at maturity
43	F. muelleriana	densely white-puberulous	1	0	White	Berg (1988)	colour hair	Mozambique
43	F. muelleriana	densely white puberulous	1	0	White	Berg & Wiebes (1992)	colour hair
43	F. muelleriana	minutely but densely grey puberulous	1	0	Grey	Burrows & Burrows (2003)	colour hair
44	F. natalensis	yellow to red	0	1	Yellow, Red	Dominy et al. (2003)	at maturity
44	F. natalensis	red	0	1	Red	Van Greuning (1990)	ripe
44	F. natalensis	red-brown	1	0	Brown	Wilson & Downs (2012)	ripe
44	F. natalensis	reddish, orange or yellowish (to brown)	0	1	Orange	Berg & Wiebes (1992)	at maturity
44	F. natalensis	yellow, orange or red	0	1	Yellow, Orange, Red	Beentje & Mbago (2007)	ripe
45	F. nigropunctata	green to reddish	1	0	Green	Dominy et al. (2003)	at maturity
45	F. nigropunctata	green with red spots or reddish	1	0	Green	Berg & Wiebes (1992)	at maturity
46	F. oreodryadum	orange to yellow	0	1	Orange, Yellow	Berg & Wiebes (1992)	at maturity
47	F. oresbia	purplish	1	0	Purple	Berg (1980)	at maturity
47	F. oresbia	purplish	1	0	Purple	Berg & Wiebes (1992)	at maturity
48	F. ottoniifolia	green to pale orange	0	1	Green, Orange	Dominy et al. (2003)	at maturity
48	F. ottoniifolia	pale orange-green to pale yellow with paler green to white spots	0	1	Green, Yellow	Berg (1988)	at maturity	Uganda to Sierra Leone
48	F. ottoniifolia	greenish to pale orange or brownish, with pale green to whitish spots	0	1	Orange	Berg & Wiebes (1992)	at maturity
48	F. ottoniifolia	pale orange or brown	0	1	Orange, Brown	Beentje & Mbago (2007)	ripe
49	F. ovata	green	1	0	Green	Dominy et al. (2003)	at maturity
49	F. ovata	greenish	1	0	Green	Berg & Wiebes (1992)	at maturity
49	F. ovata	greenish	1	0	Green	Beentje & Mbago (2007)	ripe
50	F. pachyneura	yellow hairs	0	1	Yellow	Berg (1988)	unknown		F. camptoneuroides
50	F. pachyneura	glabrous or white appressed-puberulous	1	0	White	Berg & Wiebes (1992)	colour hair
51	F. palmata	yellowish to greenish, often pinkish to purplish tinged	0	1	Yellow, Green	Berg & Wiebes (1992)	at maturity
52	F. persicifolia	green sometimes faintly yellow-spotted	1	0	Green	Burrows & Burrows (2003)	unknown
53	F. platyphylla	greenish	1	0	Green	Berg & Wiebes (1992)	at maturity
53	F. platyphylla	pale green with lighter spots, dark brown to blackish when dry	1	0	Green	Berg, Hijman & Weerdenburg (1985)	unknown
54	F. polita	green with yellow specks to purplish	1	0	Green	Dominy et al. (2003)	at maturity
54	F. polita	yellowish-green	1	0	Green	Van Greuning (1990)	ripe
54	F. polita	greenish to purplish	1	0	Green, Purple	Berg & Wiebes (1992)	at maturity
55	F. populifolia	green with red spots or yellowish	1	0	Green	Dominy et al. (2003)	at maturity
55	F. populifolia	green with red spots	1	0	Green	Berg & Wiebes (1992)	at maturity
56	F. preussii	greenish with yellowish spots	1	0	Green	Berg & Wiebes (1992)	at maturity
56	F. preussii	green with prominent yellow dots	1	0	Green	Ebika (2010)	ripe
56	F. preussii	greyish green with yellowish spots	1	0	Green	Berg, Hijman & Weerdenburg (1984)	at maturity
57	F. pseudomangifera	orange to red	0	1	Orange, Red	Berg & Wiebes (1992)	at maturity
57	F. pseudomangifera	orange to red	0	1	Orange, Red	Berg, Hijman & Weerdenburg (1984)	at maturity
58	F. psilopoga	olive green, orange	0	1	Green, Orange	Burrows & Burrows (2003)	ripe
59	F. pygmaea	red	0	1	Red	Van Greuning (1990)	ripe
59	F. pygmaea	red	0	1	Red	Berg & Wiebes (1992)	at maturity
60	F. recurvata	greenish	1	0	Green	Berg & Wiebes (1992)	at maturity
60	F. recurvata	green with cream spots when living	1	0	Green	Berg, Hijman & Weerdenburg (1985)	alive
61	F. rokko	yellowish-green with small warts, bright red or flushed with pink	0	1	Green, Red, Pink	Burrows & Burrows (2003)	ripe
62	F. sagittifolia	greenish or partly purplish-red, with pale spots	1	0	Green	Berg & Wiebes (1992)	at maturity
63	F. salicifolia	red brown	1	0	Brown	Chantarasuwan (2014)	ovary
64	F. sansibarica	green or purplish	1	0	Green	Dominy et al. (2003)	at maturity
64	F. sansibarica	yellowish-green	1	0	Green	Van Greuning (1990)	ripe
64	F. sansibarica	greenish or partly purplish	1	0	Green	Berg & Wiebes (1992)	at maturity
64	F. sansibarica	green or purplish	1	0	Green, Purple	Beentje & Mbago (2007)	ripe
65	F. saussureana	yellow or orange	0	1	Yellow, Orange	Dominy et al. (2003)	at maturity
65	F. saussureana	yellow to orange to reddish	0	1	Yellow, Orange	Berg & Wiebes (1992)	at maturity
66	F. scassellatii	pale green	1	0	Green	Dominy et al. (2003)	at maturity
66	F. scassellatii	green	1	0	Green	Berg & Wiebes (1992)	at maturity
66	F. scassellatii	greenish	1	0	Green	Beentje & Mbago (2007)	ripe
67	F. scott-elliotii	greenish	1	0	Green	Berg & Wiebes (1992)	at maturity
68	F. stuhlmannii	red	0	1	Red	Dominy et al. (2003)	at maturity
68	F. stuhlmannii	red	0	1	Red	Van Greuning (1990)	ripe
68	F. stuhlmannii	pinkish or purplish	0	1	Pink, Purple	Berg & Wiebes (1992)	at maturity
68	F. stuhlmannii	pink to purple	0	1	Pink, Purple	Beentje & Mbago (2007)	ripe
69	F. subcostata	scabrous with rather dense white rigid hairs	1	0	White	Berg & Wiebes (1992)	colour hair
69	F. subcostata	dense rigid white hairs	1	0	White	Berg, Hijman & Weerdenburg (1985)	colour hair
69	F. subcostata	dense white rigid hairs	1	0	White	Berg, Hijman & Weerdenburg (1984)	colour hair
70	F. subsagittifolia	medium-green with white spots to black-maroon with pale brown spots	1	0	Green, Maroon, Black	Berg (1980)	(at maturity?)
70	F. subsagittifolia	green with white spots to dark maroon with pale brown spots	1	0	Green, Maroon	Berg & Wiebes (1992)	at maturity
70	F. subsagittifolia	medium-green with white spots to maroon-black with pale brown points	1	0	Green, Maroon, Black	Berg, Hijman & Weerdenburg (1984)	at maturity
71	F. sur	orange or red	0	1	Orange, Red	Dominy et al. (2003)	at maturity
71	F. sur	red	0	1	Red	Van Greuning (1990)	ripe
71	F. sur	pink-red with pale spotrs	0	1	Pink, Red	Wilson & Downs (2012)	ripe
71	F. sur	red to dark orange	0	1	Red, Orange	Berg & Wiebes (1992)	at maturity
71	F. sur	orange to red	0	1	Orange, Red	Beentje & Mbago (2007)	ripe
72	F. sycomorus	yellow or reddish	0	1	Yellow	Dominy et al. (2003)	at maturity
72	F. sycomorus	bright orange	0	1	Orange	Van Greuning (1990)	ripe
72	F. sycomorus	yellow to red	0	1	Yellow, Red	Beentje & Mbago (2007)	ripe
73	F. tesselata	(pale) green with yellow spots	1	0	Green	Berg & Wiebes (1992)	at maturity
74	F. tettensis	red	0	1	Red	Dominy et al. (2003)	at maturity
74	F. tettensis	red	0	1	Red	Van Greuning (1990)	ripe
75	F. thonningii	yellow or red	0	1	Yellow, Red	Dominy et al. (2003)	at maturity
75	F. thonningii	red	0	1	Red	Van Greuning (1990)	ripe
75	F. thonningii	reddish, yellowish or brownish	0	1	Red, Yellow, Brown	Berg & Wiebes (1992)	at maturity
75	F. thonningii	yellow or red	0	1	Yellow, Red	Beentje & Mbago (2007)	ripe
76	F. tremula	green	1	0	Green	Dominy et al. (2003)	at maturity
76	F. tremula	yellowish-green	1	0	Green	Van Greuning (1990)	ripe
76	F. tremula	greenish	1	0	Green	Berg & Wiebes (1992)	at maturity
77	F. trichopoda	red	0	1	Red	Dominy et al. (2003)	at maturity
77	F. trichopoda	red	0	1	Red	Van Greuning (1990)	ripe
77	F. trichopoda	red	0	1	Red	Wilson & Downs (2012)	ripe
77	F. trichopoda	red to yellowish	0	1	Red	Berg & Wiebes (1992)	at maturity
77	F. trichopoda	red (with yellow)	0	1	Red	Berg, Hijman & Weerdenburg (1984)	at maturity
78	F. umbellata	yellowish-green with brighter spots	1	0	Green	Berg & Wiebes (1992)	at maturity
78	F. umbellata	yellowish green	1	0	Green	Berg, Hijman & Weerdenburg (1984)	at maturity
79	F. usambarensis	reddish	0	1	Red	Burrows & Burrows (2003)	ripe
80	F. vallis-choudae	yellow or reddish	0	1	Yellow, Red	Dominy et al. (2003)	at maturity
80	F. vallis-choudae	yellowish to orange with longitudinal orange to reddish stripes	0	1	Orange	Berg & Wiebes (1992)	at maturity
80	F. vallis-choudae	yellowgreen turning orange and pink with darker stripes	0	1	Yellow, Green, Orange, Pink	Beentje & Mbago (2007)	ripe
81	F. variifolia	yellow	0	1	Yellow	Berg & Wiebes (1992)	at maturity
81	F. variifolia	yellow	0	1	Yellow	Beentje & Mbago (2007)	ripe
81	F. variifolia	yellow to brown with green dots	0	1	Yellow, Brown	Ebika (2010)	ripe
82	F. vasta	green with white spots	1	0	Green	Dominy et al. (2003)	at maturity
82	F. vasta	green with paler spots	1	0	Green	Berg & Wiebes (1992)	at maturity
83	F. verruculosa	red or purple	0	1	Red, Purple	Dominy et al. (2003)	at maturity
83	F. verruculosa	red	0	1	Red	Van Greuning (1990)	ripe
83	F. verruculosa	dark purple to dark red	0	1	Purple, Red	Chantarasuwan (2014)	at maturity
83	F. verruculosa	dark-purple or to dark red	0	1	Purple, Red	Berg & Wiebes (1992)	at maturity
83	F. verruculosa	red or purple	0	1	Red, Purple	Beentje & Mbago (2007)	ripe
84	F. vogeliana	red to orange-red, often with yellowish to white spots	0	1	Red, Orange	Berg & Wiebes (1992)	at maturity
84	F. vogeliana	red to orange red, often with yellowish white spots	0	1	Red, Orange	Berg, Hijman & Weerdenburg (1984)	at maturity
85	F. wakefieldii	densely white to yellow pubescent to (sub)hirsute or to sparsely hirtellous	0	1	White, Yellow	Berg & Wiebes (1992)	colour hair
85	F. wakefieldii	densely set with white or yellowish hairs	0	1	White, Yellow	Burrows & Burrows (2003)	colour hair
86	F. wildemaniana	red	0	1	Red	Ebika (2010)	ripe
86	F. wildemaniana	green with yellow spots	1	0	Green	Berg, Hijman & Weerdenburg (1984)	at maturity

## Sheet: Comments
Palm fruit colour data
Actinokentia divaricata and Acrocomia emensis= double in PalmFruitData and therefore one of each is deleted.
For 763 palm species, there is no colour information.
For 47 palm species, the colour descriptions are too vague or not sufficient to be classified into non-conspicuous/conspicuous.
In total, 1751 palm species are colour-classified.
Cocos nuciferaand Nypa fruticansare deleted, because they are dispersed by water.
Finally, 1749 palm species are included in the colour analysis.

## Sheet: General criteria
Non-conspicuous colours	Conspicuous colours	Criteria
black (Dominy et al., 2003)	yellow (Dominy et al., 2003)	If a fruit is described as a combination of non-conspicuous and conspicuous colours, for example green/yellow, yellow-brown, grey orange, then the non-conspicuous colour is the dominant hue. The fruit colour is then classified as non-conspicuous --> NOTE: a comma between two colours, e.g yellow, brown is not considered as a combination of colours, but as two seperate colours!
purple (Dominy et al., 2003)	orange (Dominy et al., 2003)	Descriptions as: 'from colour A to colour B' is interpreted as a range of colours, so colour B is not automatically interpreted as the mature colour.
brown (Dominy et al., 2003)	red (Dominy et al., 2003)	If a fruit is described as for example 'orangey-brown' or 'creamy brown' or 'creaming brown', the colour is classified as brown.
green (Dominy et al., 2003)	crimson	Orange-tinged is interpreted as a 'touch or trace of' orange.
cream	pink	The description 'dull orange' = orange (Dominy et al., 2003), accordingly, 'pale yellow' is interpreted as yellow.
grey	scarlet	Colours that are given for young fruits are exluded.
ivory
white		Suffix -ish:
blue		If a fruit is described as for example 'brownish red', 'red-brownish' or 'brownish/red' the suffix ish is considered to indicate only a 'touch or trace of'. The fruit is therefore classified by its overriding hue, red (Dominy et al., 2003).
straw-coloured		When the only fruit colour description given is for example 'reddish', the colour is classified as red (Dominy et al., 2003).
		If the fruit colour is described as red to blackish, the colour is classified as red (Dominy et al., 2003).
		The description: 'purple; reddish to blackish' = classified as purple.
		If colour description is for example: 'greenish brown, yellowish' or 'brown or yellowish' or 'brown; yellowish', then the colour is classified as brown.
		If colour description is: 'pinkish-brown, orange-yellow, reddish, yellowish-brown', then the colour is classified based on the main hues brown, orange and yellow.
		The description 'yellowish to reddish brown' or 'blackish to brown'= brown.
		A description as: 'yellowish- to red-brown' is classified as brown.
		If the description is: 'yellow with orange', yellow is only classified, orange is interpreted as a touch or trace of orange.
		Mature colours
		If more colours are described, but one colour is specifically described as the mature colour (e.g. at maturity, maturing, fresh, ripening), then this colour will only be used in the classification.
		The ageing colour is included in the colour classification, but does not determine the non-conspicuous/conspicuous classification.
		Any colour that is described after 'maturing', 'ripen', 'ripe' or 'ripening' is included in the colour classification, except for green.
		Descriptions with 'turning', 'becomming', 'from', 'then': unknown which stadia the fruit is in, therefore all colours are included (green also).

## Sheet: Classification
Non-conspicuous/conspicuous classification		Examples maturity	Classified colour(s)	Non-conspicuous/conspicuous
Descriptions with or:		red at maturity	red	conspicuous
non-conspicuous colour 1 or non-conspicuous colour 2 etc. = non-conspicuous		maturing red	red	conspicuous
conspicuous colour 1 or conspicuous colour 2 etc. = conspicuous		maturing red, ageing black	red, black	conspicuous
non-conspicuous colour or conspicuous colour = conspicuous		maturing white to red	white, red	conspicuous
conspicuous colour or non-conspicuous colour = conspicuous		yellow, orange or red at maturity	yellow, orange, red	conspicuous
		bright or dull orange to red at maturity	red	conspicuous
Descriptions with to:		green turning red	green, red	conspicuous
non-conspicuous colour 1 to non-conspicuous colour 2 etc. = non-conspicuous
conspicuous colour 1 to conspicuous colour 2 etc. = conspicuous
non-conspicuous colour to conspicuous colour = conspicuous
conspicuous colour to non-conspicuous colour = conspicuous
Descriptions with ,
non-conspicuous colour 1, non-conspicuous colour 2 etc. = non-conspicuous colour
conspicuous colour 1, conspicuous colour 2 etc. = conspicuous colour
non-conspicuous colour, conspicuous colour = conspicuous colour
conspicuous colour, non-conspicuous colour = conspicuous colour
Descriptions with ;
non-conspicuous colour 1; non-conspicuous colour 2 etc. = non-conspicuous colour
conspicuous colour 1; conspicuous colour 2 etc. = conspicuous colour
non-conspicuous colour; conspicuous colour = conspicuous colour
conspicuous colour; non-conspicuous colour = conspicuous colour
Descriptions with interval
non-conspicuous colour 1_non-conspicuous colour 2 etc. = non-conspicuous colour
conspicuous colour 1_conspicuous colour 2 etc. = conspicuous colour
non-conspicuous colour_conspicuous colour = non-conspicuous colour
conspiucous colour_non-conspicuous colour = non-conspicuous colour
Descriptions with break
non-conspicuous colour 1-non-conspicuous colour 2 etc. = non-conspicuous colour
conspicuous colour 1-conspicuous colour 2 etc. = conspicuous colour
non-conspicuous colour-conspicuous colour = non-conspicuous colour
conspicuous colour-non-conspicuous colour = non-conspicuous colour
Descriptions with and
non-conspicuous colour 1 and non-conspicuous colour 2 etc. = non-conspicuous colour
conspicuous colour 1 and conspicuous colour 2 etc. = conspicuous colour
non-conspicuous colour and conspicuous colour = conspicuous colour
conspicuous colour and non-conspicuous colour = conspicuous colour

## Sheet: References
References
Dominy, N.J., Svenning, J. & Li, W. (2003). Historical contingency in the evolution of primate color vision, Journal of Human Evolution, 44, pp.25–45.
Beentje, H. and Mbago, F. (2007). A GUIDE TO THE FIG TREES OF WESTERN TANZANIA WITH SPECIAL EMPHASIS ON GOMBE AND MAHALE NATIONAL PARKS. Journal of East African Natural History, 96(1), pp.1-26.
Berg, C.C. (1980). Three new African Ficus species and a comment on Ficus gnapholocarpa (Moraceae). Adansonia, 20(3), 263-272. Paris.
Berg, C.C. (1988). New taxa and combinations in Ficus (Moraceae) in Africa. Kew Bulletin, 43, 77-97.
Berg, C.C. (1990). Annotated check-list of the Ficus species of the African floristic region, with special reference and a key to the taxa of southern Africa. Kirkia, 13, 253-291
Berg, C.C., Hijman, M.E.E. & Weerdenburg, J.C.A. (1984). Moracées (incl. Cécropiacées). Flore du Gabon, 26, 1-276.
Berg, C.C., Hijman, M.E.E. & Weerdenburg, J.C.A. (1985). Moracées (incl. Cécropiacées). Flore du Cameroun, 28, 1-298.
Berg, C.C. & Wiebes, J.T. (1992) African fig trees and fig wasps. Koninklijke Nederlandse Akademie van Wetenschappen. Amsterdam. 1-298.
Burrows, J. & Burrows, S. (2003). Figs of southern & south-central Africa. Umdaus Press, Hatfield, pp. 379.
Chantarasuwan, B. (2014). Taxonomy, systematics, and biogeography of Ficus subsection Urostigma (Moraceae), Doctoral thesis, Leiden University.
Dominy, N., Svenning, J. and Li, W. (2003). Historical contingency in the evolution of primate color vision. Journal of Human Evolution, 44(1), pp.25-45.
Dowsett-Lemaire, F. and White, F. (1990). New and Noteworthy Plants from the Evergreen Forests of Malawi. Bulletin du Jardin botanique national de Belgique, 60(1/2), 73-110
Ebika, S.T.N. (2010). A Preliminary checklist of the Vascular Plants and a key to Ficus of Goualougo Triangle, Nouabalé-Ndoki National Park, Republic of Congo. MSc University of Edinburgh.
van Greuning, J. (1990). A synopsis of the genus Ficus (Moraceae) in southern Africa. South African Journal of Botany, 56(6), pp.599-630.
Wilson, A. and Downs, C. (2012). Fruit nutritional composition and non-nutritive traits of indigenous South African tree species. South African Journal of Botany, 78, pp.30-36.
